# Supplementary material for: Immune and Stroma Related Genes in Breast Cancer: A Comprehensive Analysis of Tumor Microenvironment Based on the Cancer Genome Atlas (TCGA) Database
Source: Front Med (Lausanne). 2020 Mar 5;7:64. doi: 10.3389/fmed.2020.00064 (PMC7066229; doi:10.3389/fmed.2020.00064)
Supplement: Supplementary file 2 [file Table_2.XLSX]

## Sheet: DEG expression
ID	TCGA.OL.A5RW.01A.11R.A28M.07	TCGA.E2.A14U.01A.11R.A22K.07	TCGA.C8.A26V.01A.11R.A16F.07	TCGA.E9.A5UP.01A.11R.A28M.07	TCGA.E9.A1NE.01A.21R.A14M.07	TCGA.E2.A15E.06A.11R.A12D.07	TCGA.A1.A0SQ.01A.21R.A144.07	TCGA.A2.A0EV.01A.11R.A034.07	TCGA.A2.A0SX.01A.12R.A084.07	TCGA.E2.A1IU.01A.11R.A14D.07	TCGA.BH.A0BO.01A.23R.A12D.07	TCGA.E2.A1LS.01A.12R.A157.07	TCGA.A8.A08A.01A.11R.A32Y.07	TCGA.A7.A26E.01A.11R.A277.07	TCGA.E2.A573.01A.11R.A29R.07	TCGA.E9.A3QA.01A.61R.A22K.07	TCGA.AO.A1KS.01A.11R.A13Q.07	TCGA.AR.A2LH.01A.31R.A18M.07	TCGA.BH.A202.01A.11R.A14M.07	TCGA.D8.A1JH.01A.11R.A13Q.07	TCGA.D8.A1X9.01A.12R.A157.07	TCGA.D8.A1J8.01A.11R.A13Q.07	TCGA.A2.A3XS.01A.11R.A22U.07	TCGA.BH.A18V.06A.11R.A213.07	TCGA.GM.A5PV.01A.11R.A28M.07	TCGA.B6.A0WW.01A.11R.A109.07	TCGA.A2.A04R.01A.41R.A109.07	TCGA.A8.A0AD.01A.11R.A056.07	TCGA.AN.A0G0.01A.11R.A034.07	TCGA.C8.A134.01A.11R.A115.07	TCGA.A2.A25A.01A.12R.A16F.07	TCGA.D8.A27L.01A.11R.A16F.07	TCGA.EW.A1OW.01A.21R.A144.07	TCGA.A8.A09M.01A.11R.A00Z.07	TCGA.A2.A0EP.01A.52R.A22U.07	TCGA.A2.A1FV.01A.11R.A13Q.07	TCGA.E2.A2P5.01A.11R.A19W.07	TCGA.A8.A07L.01A.11R.A00Z.07	TCGA.OL.A6VO.01A.12R.A33J.07	TCGA.AR.A24K.01A.11R.A169.07	TCGA.AC.A3TN.01A.11R.A22K.07	TCGA.B6.A0I1.01A.11R.A21T.07	TCGA.A2.A25E.01A.11R.A169.07	TCGA.B6.A0IM.01A.11R.A034.07	TCGA.A8.A07U.01A.11R.A034.07	TCGA.B6.A0RP.01A.21R.A084.07	TCGA.BH.A0BW.01A.11R.A115.07	TCGA.B6.A0I5.01A.11R.A034.07	TCGA.AO.A124.01A.11R.A10J.07
MYT1	0.0208869	0.138947	0.130446	0.220309	0.518127	0.031618	17.6857	0.115794	0.0174141	0.0404811	0.0149098	0.00229657	0.41222	0.415173	0.0351999	0.0258688	0.185563	0	0.0230781	0.0788723	1.3009	0.0894725	0.155619	0.0191141	0.119062	0.050241	0.0132463	0.44443	0.0194615	0.0408033	0.195408	0.0531947	0.166126	2.10233	0.0164204	5.54974	0.0108012	0.0902123	0.12439	0.755958	0.520147	0.0569495	0.0891414	2.06724	0.0116243	0.516345	0.00860051	0.509489	0.120864
BRINP2	0.0882747	0.224216	0.0244823	0	0.117777	0.920211	10.3112	0.00417089	0.883174	0.486527	0.393836	0	4.04185	0.0939994	0.329652	0.0149087	4.71682	0.305016	14.3658	0.0304884	2.43359	0.408526	0.148765	0.00336594	0.144007	0.272054	0.0335898	15.5281	0	0.0026945	0.461829	0.0907919	0.321798	0.324539	0.0780728	0.304359	0.0171185	1.39509	4.70512	0.00341338	0.0741493	0	0.00392438	0.712241	0.00460577	0.320987	0.00454357	0.663093	5.9012
SLC1A2	0.0371419	1.19497	0.31568	8.24841	2.6681	0.81343	0.848158	0.439899	0.0796283	15.4991	0.234832	0.101513	1.28035	0.530355	0.347924	0.481517	1.96173	0.573927	2.73379	5.31108	0.669667	0.117975	0.348891	0.149985	0.929664	1.47199	1.01758	18.2044	0.365847	0.964851	0.298713	0.667348	0.0994088	1.44406	0.220486	13.1028	0.489782	3.13061	0.0294926	2.94242	0.571887	0.0231474	0.322062	6.10524	0.750057	0.871825	1.60512	0.786853	1.67523
SLC8A2	1.76174	0.142691	0.0445949	0.0365986	0.051301	0.688365	0.0452075	0.160535	0.0814973	0.00381077	0.0814067	0.0025943	0.0186265	0.0312665	0.0722969	0.0106264	0.0376242	0.0141786	0.236635	0.0630202	0.204702	0.0192518	0.184165	0.0143947	0.0884854	0.0189181	0.00897814	0.00380339	0.0195418	0.0192055	0.0212996	0.0231119	0.0500436	0.0524326	0.0397483	9.81089	0.0579571	0.0494098	0.0187355	0.0170306	0.0715045	0.113225	0.0139858	0.130226	0.0492425	0.0226275	0.0550546	0.0495499	0.0503016
FAM57B	0.132984	1.31251	0.0961667	1.06851	0.176114	0.607584	0.331237	0.0871291	0.0570207	0.309286	0.0443001	0.014622	0.286951	0.0352447	0.146692	0.1108	0.908813	0.0745855	0.298391	0.0759378	0.206459	0.119357	0.163562	0.365091	0.271304	0.0586443	0.431807	1.22189	0.0357958	0.0346386	0.111318	0.359526	0.0282055	0.3581	0.0985726	1.52768	0.144417	0.27152	0.0492783	0.156323	0.287365	0.214653	0.198643	0.119427	0.0370053	0.49596	0.226334	0.300755	0.0243007
CST9L	0	1.13877	0.0448516	0.0634961	0.283194	0.0938889	0.0186743	0.085962	0	0.11019	0.0649357	0	2.89046	0	0	0	0	0	0.0115973	0.238779	0.0996897	0	0	0	0.69594	0	0.55383	0	0	0	0	0.106927	0	0.0713466	0.0153246	5.01827	0	0.0178589	0	0.0281399	0.143832	0	0.177939	0.127646	0	0	0	0	0
AC025423.3	0.0465019	0.134987	0.573197	0.216392	9.26509	0.614342	2.2529	1.23041	0	0.901259	0.0331947	0.214747	0.0367102	0	0	0	0	0	0	0.154184	2.90477	0	0.131987	0.0851101	0.251125	0.0559275	1.80485	0.0449757	0	0.0227108	0.0457948	0.519274	0.0493145	5.7261	0.0313354	0.0864711	0	3.43264	0.036925	0	0	0.0304297	0.694615	0.0783023	0.03882	0.0297304	0.0382958	0	0
AL023693.1	0	0.293098	0.199133	0.187941	0.119746	0.25011	0.414552	0.0763311	0	0.19569	0.216227	0	0.318835	0.22937	0	0.0682105	0.0690025	0.121349	0.46341	0.33478	0.0553255	0.556097	1.71949	0	0.272633	0	0	0.0976556	0.188157	0	0	0	0	0	0.136077	0.0625848	0.469927	0	5.29155	0.187404	0.399118	0	0	0.113345	0	0.322767	0.166303	0.391458	0.123004
TMEM82	0.0143483	0.0104127	0.00707446	0.0267073	0.0170165	0.0236946	0.259204	0.0108471	0	0.417129	0.0409693	0	0.033981	0	0	0.0290792	0.00980562	0	0	0.023787	0.0157241	0	0.0101812	0	0.129142	0.0172566	0	0.0138774	0.00891272	0	0	0	0	0.0450141	0	0.00889363	0	0.0450702	0.0113933	0	0	0	0.010206	0	0	0.00917339	0.0236325	0.0556283	0
RTBDN	1.53277	0.0118335	0.128636	0.349042	0.0193384	0.0740512	7.00947	2.1141	0.116528	0.173817	0.0232797	0.0053787	0.0321814	0	0.0149891	0.0440627	0.150438	0.00979868	0.041577	0.00450545	0.156359	0.0199571	0.0289261	0.0397923	0.0293527	0	0	0.76489	0.00506442	0.250855	0.0762761	0.0287504	0.051877	0.0639452	0	0.636751	0.00632425	0	0.0194218	0.171501	0.0773469	0.15472	0.342158	0.0732188	0.0204186	2.46032	0.0805715	0.165949	0.0695259
C8orf86	0	0.0914464	0.109921	0.117275	0.0402345	0.16007	0.039797	0.0219833	0.0138539	0.0657518	0	0.140683	0.0382601	0.154137	0.0178204	0.0130964	0.152358	0.0116495	0.00494304	0.0321388	0.100914	0.100839	0	0	0.0174485	0.151551	0.125404	0	0	0.0142018	0.0381827	0.187995	0.0205587	0.243276	0.019595	0.787066	0.0676695	1.09611	0	0	0.0153261	0	0.144789	0.614783	0	0	0.0239477	0.028185	0.00590418
CELF3	0	0.0035655	0	0.370377	0.0349606	0.00811349	0.00403438	0.00371424	0.0175554	0.0428499	0.00701434	0	0.0155144	0.0613859	0.00451631	0.0165955	0.292114	0.0177144	0.0350768	0.00543008	0.0484581	0.00601321	0.0871562	0.00599484	0.0530649	0.437265	0.00747807	0.0142556	0.00305189	0.00959799	0.00725763	0.0202129	0	0.0732151	0.00662144	0.0152268	0.00762215	0.293225	0.0234077	0.00303967	0.0310735	0.0321503	0.0733892	0.00551532	0.0246091	0.00314115	0.00404612	0.0142862	0.00299266
RPS20P22	0	0.25218	0.244761	1.20122	0.166808	0.0273261	0.0407632	0.050038	0.0118252	0	0.295302	0.185581	0.0261261	0.432288	0.106476	0.525397	0.768975	0.0994365	0.0253153	0.100586	0.81603	0.283533	0.0352249	0.0605715	0.029787	0.358224	0.667429	0.0800213	0.0102787	0.202037	0.11407	0.641866	0.157934	0.545087	0.167257	6.50274	0.179699	13.0074	0.0262789	0.0102376	0.0261637	0.0216564	0.223633	1.88541	0.0414414	0.0528966	0.0272545	0.288693	0.0302377
TMEM145	0.974813	0.239807	0.431756	2.31423	0.431084	2.31238	2.48279	0.368471	0.543137	0.984676	0.165119	0.0708501	0.88694	0.0844499	0.0455635	0.457631	1.8179	0.0992858	1.40708	0.0684777	0.366657	0.470154	0.650673	0.11088	0.914561	0.15897	1.34541	2.91635	0.082105	0.0645538	0.467792	0.145658	0.324149	4.81412	0.484309	14.0252	0.262732	0.441142	0.124636	2.64751	1.52826	0.0864942	1.85687	0.570331	0.0344822	1.92252	0.0136066	0.720639	0.0805116
DPY19L2P1	0.0105461	0.0401804	0.140395	0.0269915	0.0125073	0.0195927	0.0952587	0.00199317	0.0188415	0.0153297	0.0188205	0.00869682	0.131126	0.0479149	0.0218123	0.00534338	0.0828831	0.0031687	0.0349575	0.0291394	0.511413	0.00161343	0.0130958	0.0369956	0.158992	0.00634187	0.00200648	0	0.00163773	0.00128764	0.10905	0.512901	0	0.00620358	0.0177663	0.0686375	0.0736249	0.250523	0.517106	0.0603536	0.195931	0.0189781	0.0450089	0.392158	0	0	0.080337	0.127773	0.0144535
FCRLB	0.260837	0.299204	0.580804	1.5975	0.543844	0.180635	11.7042	0.349851	0.396857	1.32091	0.16217	0.671663	0.538033	0.277156	0.456338	0.943579	0.0517519	0.465173	0.390466	0.288282	0.258186	0.401625	0.441815	3.83972	0.212048	0.131555	0.083244	0.358071	0.193384	0.723241	0.348019	0.682433	0.29446	0.178181	0.83914	1.12653	0.0652676	1.46687	0.193756	0.0208227	13.4503	0.33036	0.269324	4.81716	1.70687	4.59943	1.40665	0.154952	0.307509
AC013480.1	0.0630329	0.0914871	0.341864	0	0.0747545	0.052046	0.0517591	0.0476518	0	0.24433	0	0	0.348322	0	0.057942	0	0.12923	0	0	0.13933	0.0690769	0	0	0	0	0.0758092	0.14391	0	0.274079	0	0.0620744	0.0370459	0.200536	0.247187	0	2.57864	0.195576	0.0494991	0.0500515	0.0389974	0.0498321	0.0412472	0	0.919863	0	0	0.0519097	0	0.0383942
GACAT2	0.159971	0.0193487	0.0394371	0.0248137	0.0948596	0	0.218932	0	0	0.103347	0.0190322	0	0.0420955	0.121134	0	0.0720463	0.0182207	0	0	0.0442007	2.10372	0	0.0189186	0	0.0239971	0	0.324647	0.56731	0	0.286467	0.0787693	0	0.0848233	0.0209112	0	1.25598	0.0827255	0	0.423418	0.0659809	0	2.86129	0	0.374122	0.0667723	0.0170459	0	0	0
DDX11L8	0	0	0	0.0554579	0.106004	0	0.0489307	0	0	0.115489	0	0	0	0.203049	0	0.0805108	0.0407228	0	0.0303876	0.0987875	0	0	0.126848	0.036354	0	0.0716666	0.0453486	0	0.111044	0.0873063	0.0293412	0.070043	0	0	0	0.590965	0.0924446	0.233971	0	0	0	0.0389933	0	0.0334461	0.0994896	0	0.0490731	0	0
PRTN3	0	0.911518	0.403479	0.53135	0.0338548	0.0157137	0	0	0	0.0922099	0.0271699	0.012555	0.0600945	0.10808	0.0174938	0	0.0520228	0.0914885	0.0388197	0.241883	0.0521392	0.17469	0.756218	0.162546	0.393962	0.13733	0.101381	0	0.0118214	0.436836	0.0655952	0.089479	0	0.38808	0	0.342087	0	1.24041	0	0.235482	2.36211	0.11208	0.365491	0.160226	0.0158871	0.133839	0	0.442696	0
NEURL1	2.21127	0.386031	0.0823666	1.17015	1.24867	8.0874	12.6129	0.548365	0.647177	4.71171	0.144355	0.0116009	0.829445	0.0299601	3.1359	1.58294	9.58986	0.253608	0.116576	0.665646	0.886457	0.293237	0.140374	1.82914	0.680567	1.4064	8.3908	1.11399	0.0764615	0.154585	1.30745	2.64315	0.186482	2.25497	0.939069	2.13906	3.57716	7.63295	0.0558526	0.364458	0.848019	0.034521	13.5337	22.5036	0.0917486	2.1951	0.0144815	2.8719	0.0830108
PEX5L	0.00852262	0.0943204	0.0346673	0.0356933	0.0454837	0.325465	0.0979761	0.180403	0.149218	0.78666	0.162741	0.0435745	0.0302762	0.130685	0.0352543	0.0503782	0.267921	0.0512143	0.076058	0.268452	0.0303544	0.00521544	0.134556	0.042896	0.147663	0.125564	1.53069	1.37038	0.0277935	0.0104058	0.0356704	0.130232	0.0225952	0.105279	0.0373294	6.79085	0.0512347	0.0786395	0.0609067	0.16873	0.0488487	0.0153367	0.744131	0.0502279	0.0764833	0.106252	0.0596586	0.00413028	0.0389344
SNORA11	0.851929	6.18253	1.34415	0.31715	0.909318	6.04953	1.53902	0.772852	0.85234	1.98136	0.729766	0.786845	2.15213	69.2841	0.626498	0.805737	3.37681	0	0.955784	6.12019	0.840256	2.81524	2.05533	1.0395	1.07349	1.02461	3.24172	1.64794	0.317516	0.582497	1.92964	4.10572	0.542074	4.1427	0.803703	2.6403	2.51117	1.07042	0.405886	1.47581	4.17577	1.67245	4.24186	4.78174	0.284478	0.980406	0.561273	0.495439	1.45298
SCRT1	0.0346272	0.0251293	0.00284551	0.0966807	0.0136888	0.0333568	0.0236949	0	0.00824856	0.0279631	0.0041197	0	0.0683398	0.00655517	0.0212203	0.0428865	0	0.0208083	0.0117723	0.00318922	0.0158115	0.00706341	0.0409512	0.0211255	0.0363607	0.0347049	0.00439206	0.0613998	0	0.0338228	0.0170503	0.0373105	0.00612026	0.0724227	0.0116668	15.1495	0.00447668	0.0271924	0.00458264	0	0.0456256	0.0226592	0.0123152	0.00647857	0.0481783	0.0221385	0.0380222	0	0.00351533
AC069120.1	0.460356	1.54514	3.0926	5.89112	1.29666	2.04311	2.50437	0.957059	0.205616	0.947986	0.534006	3.30279	1.18112	0.849699	0.211588	3.80971	3.30338	0.484117	0.55756	1.27199	4.03599	0.563433	0.367491	1.05321	1.08766	0.899709	2.45241	0.445248	0.822134	0.449662	0.821708	3.41584	0.85435	2.52744	0.155106	62.6693	2.94603	5.06118	0.182774	2.31412	0.0454932	0.112967	1.22795	5.87839	0.0480385	2.06026	1.08997	3.3465	0.420615
INSYN1-AS1	0	0	0	0.0128874	0.205278	0	0	0.0104683	0.108852	0.0134187	0	0	0.0327944	0	0	0.0187092	0.719203	0	0.0494304	0.0229563	0.0986375	0.0169477	0	0	0	0	0.11592	0	0	0.0202883	0.020455	0.0162767	0	0	0.00933097	0.583648	0.107412	0.108741	0	0.0342682	0.0656834	0.00906129	0.00984957	2.65033	0	0	0.0114036	0.0134214	0.00843455
PAH	0.118579	0.0794342	0.0584656	53.9147	0.466963	2.79169	0.778962	0.878047	1.00602	0.0324104	0.0173633	0.0100293	0.00240026	0	0.00279491	0.0225942	0.151684	0.0438502	0.0620206	0.100812	0.274892	0.0111638	0.0107873	0.0129846	0.013683	0.00365677	0.00462779	2.02614	0.00188866	0	0.0853361	0.0125087	0.0451413	0.293316	0	11.7958	0.00235848	0.121771	0.0676005	0.110985	0	0.0955017	0.406588	0.269639	0.00253821	0.00194389	0.590929	0.109039	0.127788
LINC02306	0.0824551	0.897577	0	0	0.0244471	1.77015	0.0338538	0.0623346	0.11785	5.59326	5.23849	0.326382	4.19849	3.1843	0.720058	0	0.563499	0.0990982	0	3.91863	0.0451807	0.0252293	0	0	8.27486	0.148752	0.0941262	0	0	0	0.101502	0	0.0437211	0.226347	0.0277813	0.894406	3.48581	0.129502	0	0.127534	0.0977802	0	0.0293253	0	0	1.76601	0	0	0.853819
TMPRSS6	0.128228	2.3768	8.9724	17.9058	1.82804	2.27194	1.15384	1.47022	0.080181	7.4297	1.537	0.014099	18.0185	0.673613	0.0540243	0.187688	0.0657231	0.288955	0.629384	2.82849	0.111247	0.425042	0.0985698	0.143421	8.91075	1.63857	0.703425	0.501244	0.0066376	0.0939366	0.297279	0.471014	0.0396618	5.95461	0.442833	3.06994	0.087032	0.025174	0.0466673	1.67589	0.582896	0.262216	2.0674	11.0327	0.0356817	1.44149	0.0483998	2.1957	0.0390527
APLP1	8.95998	0.774913	2.81477	0.283145	1.70146	0.38912	2.98314	1.36193	2.74966	0.953828	0.570612	0.956315	1.18673	0.149066	5.49453	4.3604	1.29232	0.716944	0.933919	1.5164	2.33711	1.37625	8.88484	6.73284	0.697989	0.200886	0.226991	0.271171	0.36314	18.4651	1.12206	0.872989	3.27696	0.383654	0.667282	10.1461	0.370183	6.83006	0.426314	0.852545	2.33445	6.30821	1.76516	1.81141	1.61847	0.751335	3.16376	1.16795	4.56379
RPL3L	0.0158154	0.149206	0.0311912	0.176629	0.0140673	0.0522347	0.0779201	0.0358684	0.0169532	0.137934	0.0225792	0.130421	0.0998814	0	0.050883	0.427367	0.0432329	0.0380152	0.0322606	0.0436986	0.0693274	0.0435522	0.0673334	0.453489	0.113877	0.00951051	0.0180539	0.0688334	0.0196481	0.278063	0.0311498	0.111541	0.0335438	0.0372125	0.053286	0.137242	0.0674732	0.0558884	0.0941868	0.0538158	0.131283	0.388095	0.0787466	0.0443846	0.0462096	0.0859465	0.156294	0.306581	0.120417
KCNH6	0	0.0300684	0	0.0192805	0.0122845	0.00855279	0.0127585	0.0156614	0.00740235	0.0301133	0.00369706	0.00341677	0	0.0117654	0.00476085	0.00349881	0.0637097	0.00622452	0.0290526	0	0.0113515	0	0	0.00631942	0.00466151	0.0934338	0	0	0.00965139	0.00505883	0.025502	0.757931	0.0054924	0.0121862	0.00348998	1.88441	0	0.032537	0.00411252	0	0.00409449	0.0101673	0.0257876	0.00581395	0.00432358	0.00331122	0.0170608	0.281114	0.0126188
BSN	0.0497348	0.248749	0.0868208	0.499152	0.255064	0.168703	0.160046	0.0924723	0.222858	0.208414	0.087317	0.0266034	0.102931	0.0900799	0.0395398	0.0853588	0.202096	0.0743129	0.0623783	0.323865	0.201811	0.0460643	0.235589	0.0967676	0.102836	0.0678989	0.196409	0.200211	0.0317287	0.0656479	0.169439	0.190392	0.0584448	0.308898	0.0760855	3.32605	0.0323229	1.00913	0.103533	0.250319	0.164715	0.0466189	0.0841387	0.31235	0.0740607	0.519929	0.0852374	0.0807767	0.0630447
ACTL6B	0.0365163	0.00662506	0.00450112	0.0509776	0.00541336	0	0	0	0.0391435	0.0088466	0	0	0	0	0.0251753	0.0185017	0	0	0	0.00504482	0.00500222	0	0.032389	0.0612646	0.02465	0	0.013895	0	0	0	0.00449513	0.00536537	0.00968124	0	0.00615165	0.0113171	0	0	0.014498	0.0508321	0.0144344	0.0119477	0	0	0.030484	0.0116731	0	0.0176967	0
SYT13	11.7491	0.463963	10.0018	0.157171	44.8752	0.381805	55.007	10.4384	4.83316	11.8648	0.114811	0.734786	14.1317	0.735304	0.805761	0.0570433	49.5059	0.05799	0.748428	3.26855	49.0108	4.46846	3.24403	2.08512	0.177332	4.27978	73.0459	1.11224	0	0.325982	0.302922	1.55497	6.60935	6.65103	0.0894132	3.91293	0.0249519	1.38933	0.587477	161.746	11.8951	3.06796	5.37123	48.3241	0.0906302	18.121	0.261596	9.256	4.90328
MYOG	0.0142732	0.0207163	0.00703742	0	0.110028	0.176779	0.0586015	0	0.0102	0.0829889	0	0.00941624	0.0225354	0.016212	0	0	0	0	0	0.00788748	0.00782088	0.0087345	0	0.0435391	0.0128466	0.0171662	0.575701	0.0138047	0.00886606	0.0139416	0.00702806	0.00838866	0.0302729	0.100751	0.019236	0.00884706	0.0221432	0.0896684	0	0	0.011284	0	0.0304576	0.0721017	0	0	0	0.0968398	0.00869399
LRTM2	0.0305953	0.0296044	0.00754256	0.142373	0.27516	0	0	0.00385492	0.00728813	0.00494144	0	0.0269124	0.0120765	0.0347514	0.00937476	0.0206689	0.435601	0	0.0182027	0.0197252	0.00279409	0.0717712	1.00951	0.00622191	0.0367166	0.128789	0	0	0	0.627577	0.00251084	0.0299693	0	0.247962	0.0171806	5.78408	0.0158217	0.0961048	0.00809811	0.0126192	0.0403131	0.140146	0.0253896	0.00858634	0.0383117	0	0	0.0148273	0.0372721
FARSA-AS1	0.0904953	0.0656733	0	0	0.160986	0.523051	0.148619	0	0.129341	0.0876951	0	0.0597013	0	0.308365	0	0	0	0	0.138446	0	0.0495863	0	0.19264	0.331258	0	0.217676	0.0688696	0.175051	15.0089	0.176786	0.133679	0.212745	0	0	0.304902	0.0560926	0.0701965	0.14213	0.0718581	0.111976	0.21463	69.4627	0	0.101587	0.075546	0.0578571	0.0745259	0.0877127	0.165366
BCAR4	0	0	0.00809727	0.0764216	0.029215	0.0406805	0	0	0	0.0159145	0.0234463	0.0216687	0	0	0.0301927	0.0332835	0.0336699	0.0986877	0.184248	0	0.0359949	0	0.0699192	0	0.0295627	0.177763	0.0124982	0.0317675	0	0.0160412	0.0080865	0.019304	0.0348321	0.0257611	0	0.0305384	0.0382169	0.0515864	0.0130405	0	0.0129834	16.5928	0.0233631	0.0460891	0.0274196	0.0104997	1.19017	0.0318355	0.0400133
SLC27A2	1.00407	8.10004	6.76967	80.0892	0.909246	2.54501	13.2941	18.8941	1.25152	3.39419	3.94487	0.0359444	2.94325	7.18759	1.20917	0.830796	3.89369	1.37512	5.6284	6.61961	1.56096	2.7912	0.635145	0.897483	25.4653	5.26097	9.54864	33.3493	2.67852	0.786879	0.632375	3.38974	0.742885	0.549422	0.750024	23.6884	5.56063	3.79574	1.34117	5.93273	0.104608	0.19864	9.93789	9.537	2.05978	9.22603	0.858936	18.0834	0.298686
CPLX2	0	0	0.00151475	0.00571843	0	0.00253668	0.0151362	0.00464502	0.00658642	0.00297711	0.00219303	0	0	0.020937	0.00282405	0	0.0104976	0	0.00626671	0	0.00505014	0.00376006	0	0.00187428	0.0691281	0	0.00233802	0.0326848	0	0	0	0.00361118	0	0	0	8.29494	0	0.0168878	0	0	0.00485756	0	0	0.0103462	0.00769401	0	0	0	0.00187131
RUNDC3A	0.842403	0.167314	0.0502792	0.965569	0.0762438	0.0768786	0.316741	0.0435734	0.0982223	0.158971	0.0474741	0.0204749	0.0665022	0.0352519	0.0774366	0.251598	0.15453	0.223802	0.0542639	0.0955541	0.225936	0.0108529	0.594605	0.159591	0.111736	0.0373267	0.037116	0.0343055	0.0743602	0.376771	0.183384	0.164165	0.0564224	0.0938899	0.0627408	12.6416	0.0481486	0.128824	0.0563295	0.0685764	0.042062	0.0522236	0.0819963	0.311071	0.0592205	0.0623619	0.127796	0.133218	0.0378089
NTSR2	32.999	0.020175	0.137071	0.0258733	0	0	0.0456562	0.0105083	1.53969	0	0	0.100872	0	0.0157884	0.0127775	0.0845132	0.00949939	0	0	0	0.00761651	0	0.0690428	0.0339211	0.0375327	0	0	0	0.00863437	0.0339432	0	0	0	0.0218041	0	0	0	0	0.0331124	0.0515989	0.0329673	0.300166	0.039549	0.00780195	0.011604	0	0.0343418	0	0.0169336
COL2A1	0.185162	4.33354	0.0521682	13.143	0.219594	3.27342	0.475138	0.0274958	0.318991	0.297985	0.155778	0.0305385	0.033933	0.131446	2.07287	0.0893479	0.142357	0.0993461	0.0151754	0.723563	20.4782	0.0242808	0.814127	0	10.5201	0.294272	28.4268	0.0991361	461.745	1.65035	0.143272	2.39801	200.397	2.29766	0.0155964	0.166007	0.0974621	0.586815	0.992439	0.155469	0.16991	1.2506	4.39333	0.066811	0.0055205	0.0465067	35.7608	0.445465	10.787
LINC01983	0	0.117488	0.159644	0.279818	0	0.0190964	0.417805	0.0524523	0.0165277	0.044824	0.0165094	0	0.0182578	0	0.0637792	0.0156241	0.0632218	0.0277958	0	0.191708	2.00228	0	0	0.0282196	0.27061	0.0834464	0.0352017	0.134212	0	0	0	0.135927	0	0.290229	0	0.172025	0	0.617505	0	0.0143087	0	0.0908051	0.115155	0.402417	0	0.147864	0.0190464	0.112082	0
SELP	0.062491	2.04983	0.419035	0.0523433	6.81829	1.34672	1.71389	0.689735	3.71555	4.82642	10.7417	0.35867	0.458793	1.26344	0.746771	2.60052	2.31469	12.2796	0.819001	6.26777	0.143815	0.328878	2.3058	0.693871	2.52541	0.420882	0.775188	0.441213	0.26396	1.92274	15.3237	3.23201	0.550047	0.617557	13.9088	3.14911	2.75331	0.50055	0.605379	0.0773244	0.92385	0.0122678	1.34239	1.92563	3.47438	2.43313	0.792537	2.02302	0.0114193
TRBV6-1	0	0.157878	0.294975	0	2.80581	0.673612	0.0893199	0.863436	3.42029	0.790568	0	0.179402	0.300547	0	1.34986	3.12306	0.371684	2.81071	0.277353	0.450826	0.566224	1.56428	1.35073	0.895885	0.146855	0.130823	0	0	0.202703	0.345306	0.990869	0.639295	0.461416	0.810478	3.77486	0	0.0421879	0.0427099	0.690985	0.168243	0.0859945	0	0.58029	0.183161	1.67991	0.486807	1.70202	0.10543	0.0331282
TRGV2	0	0.145471	0.0790675	0	2.13957	0.0331028	0.0658406	0.15154	0.372451	0.0777004	0.0572365	0	0	0.500904	0.515939	0.541672	0.0273981	0.530011	0.102223	0.132927	0.197707	0.073601	0.0568951	0.978349	0	0.289301	0.0305103	0	0.0747096	0.234957	0.513255	0.164936	0.0850312	0	0.189107	0.0248498	0.0932943	0	0.0955026	0	0	0	0.228133	0.0450046	0.568956	0.128158	0.132064	0.19429	0.0488398
LINC01781	0.0615215	0.0223234	0	0	0.984988	1.75253	0.050518	0.0465092	0.571547	0.83465	0.131749	0.0202934	0	0.0349393	0.876566	0.872787	0.0420438	1.84848	0	0.0849934	0.0505655	0.0376483	0.807605	0.243966	0	0	0	0	0	0.180277	0.424102	0.198867	0.228349	0	0.68403	0	0.0238609	0	0.0977027	0	0.0486372	0.161033	0.0656407	0	0.0513585	0.117999	0.151995	0.238519	0.0374737
TRAJ3	0	0	0	0	2.29448	0.87135	0	0.531855	1.25691	0	0	0	0.277695	0.399548	0	0.475273	0.721187	0	0.179385	0.583165	0.963735	0.64579	0	1.28763	0	0	0	0	0	0.343593	0.346415	0.41348	0	0.827678	2.37037	0	0.272861	0	0.279319	0	0	0	0.250211	0	0.293655	0.224896	1.15876	0	0
IGKV5-2	1.81745	0.310339	0.263558	0	3.07464	1.54479	1.62407	10.7492	6.18842	1.65761	3.39603	1.02268	0.0421987	0.425009	15.429	2.99725	0.182654	4.49707	0.408892	0.679406	23.7249	0.359827	25.1855	3.0981	0	0.0642892	0.0813607	0	0.0332042	1.2531	5.84321	4.08413	0.396812	1.21582	0.720406	0.198799	0.0829282	0.0839543	0	0.165357	0.338077	0	0.190111	0	20.9287	0.44428	9.33254	0.0518107	0.195359
IGHV1-3	0	0.160276	0.245009	0	4.94383	0.775023	0.498721	6.34456	6.82612	4.2269	1.65537	0	0	0	0.558297	7.49729	0.452796	12.8071	0	2.74604	0.181524	0.0337882	0	1.61688	0.0993904	0.066405	0.0840384	0.0534015	0.274376	1.29434	0.625302	6.06821	1.52238	0.259828	0.0744116	0.0342236	0	0.0867173	0.394583	0.0341598	0	0	0.117821	0	88.8205	0.706003	0.227351	0.107032	0.302683
IGHV1-45	0.106128	0.0385092	0.287798	0	8.90488	0.131444	2.91941	1.16335	1.21348	0.822755	1.55305	0.0350073	0.0418907	0.180817	1.02435	15.2712	0	4.65556	0.0811814	0.909037	0	0.422146	0.451838	0.485604	0.191042	0.0638199	1.00958	0.0513226	0.0329619	0.466483	12.8814	4.05431	2.02585	9.40586	2.21696	0	0	0	0.421358	0.787918	0.209756	0.0347239	0.113234	0.0297841	0.797369	0.542815	0.437001	0.0514325	1.29289
TRAV26-1	0.0812267	0.0884205	0.280344	0	2.45646	0.46948	0.100048	0.429842	1.13192	0.0787133	0.0579826	0.08038	0.320616	0.0461303	0.559998	1.23465	0.582859	1.61076	0.704177	0.246877	0.356061	0.546776	0.432275	0.991102	0.0731084	0.0976908	0	0.274963	0.0756834	0.575214	0.359962	0.477388	0.215349	0.732631	1.28627	0.0503475	0.283531	0.159466	0.322492	0.0753805	0	0	0.259996	0	2.00035	0.103863	0.769268	0.078729	0.0742146
TRAV13-1	0.0605816	0.0439646	0.268829	0	5.81963	1.70075	0.447716	1.28236	5.28181	0.469656	0.345963	0.159867	1.53041	0.206433	0.779641	2.66021	0.993636	4.5142	5.77718	0.937383	0.896273	2.29853	0.98871	2.95679	0.109053	0.364305	0	0.117187	0.075263	0.917202	1.43185	1.70905	0.963687	1.09284	6.00098	0.0375509	0.281956	0.237871	0.625365	0.0749617	0.191577	0	0.344735	0.306032	3.4896	1.0845	1.99564	0.117438	0.33211
TRBV19	0.0395097	0.200708	0.370128	0.073542	11.48	1.40279	0.519091	1.25448	4.09406	0.497733	0.733291	0.182457	0.779758	0.269261	1.67066	3.01609	0.999036	4.13115	1.04771	1.00434	1.40719	1.95843	2.04657	3.44691	0.8179	0.190072	0.0601362	0.573196	0.196338	1.02269	2.23727	1.71834	0.293296	1.7973	7.641	0.0979588	0.766185	0.248213	0.65883	0.219996	0.249883	0.0258542	0.702585	0.243938	4.4527	0.479941	1.69195	0.651012	0.288792
TRBV21-1	0	0	0	0	0.92906	0.103494	0.102923	0.142134	0.268718	0.0607314	0	0	0.0494743	0.142368	0	0.423376	0.0428291	0.376601	0.127837	0.103897	0.13736	0	0.0889394	0.420578	0	0.0753735	0	0	0	0.0612148	0.246871	0.0736659	0	0	0.929075	0	0	0	0.149291	0	0.0495457	0	0.267467	0.035176	0.680131	0.0400677	0.103223	0	0
IGKV1D-27	0	0.0472456	0.0641981	0	0.193023	0	0.213834	1.72258	0.465243	0.693969	0.418254	0	0	0.0739462	1.0772	1.18747	0	0.469459	0	0.143905	0.499416	0.358558	0.0923908	0.278026	0	0	0.644085	0.125932	0.202199	0	0.35262	1.07134	0.0690402	0.868033	0.263217	0.0403532	0	0	0.0516949	0.402779	0	0.0426016	0.0926154	0	12.8261	0.208113	1.8765	0.0631007	0.039655
IGKV3-11	41.852	11.1821	42.4558	0	176.246	15.3055	22.7128	228.92	1323.5	104.073	127.607	2.21648	9.39736	12.2708	333.786	1244.83	5.12653	260.479	7.72474	61.4607	11.014	23.5909	41.6995	68.3831	11.2616	59.9493	10.0291	0.868396	285.825	43.5674	58.1297	140.231	54.8879	156.129	86.8896	6.96561	3.93166	3.43443	25.1603	6.4688	2.42715	46.3398	18.7888	0.991656	987.822	52.7188	151.223	13.2503	14.731
CSF2RB	1.26931	1.17122	0.819392	0.629225	8.23026	1.84041	2.00577	2.16316	8.27287	3.48297	6.40793	0.270495	1.54954	1.32282	4.48672	34.5795	1.91076	10.6209	1.84623	4.34357	1.97897	4.0119	3.7822	8.71513	1.42511	1.07018	0.96266	2.57342	1.62026	4.56944	8.21954	6.05516	2.08156	2.75054	17.5268	1.38157	1.2688	0.976221	2.3102	0.412889	0.527602	0.336808	1.5389	1.6134	11.7214	2.21703	11.0279	1.58541	0.874114
JAML	0.292079	0.770443	0.19911	0.177282	3.77418	0.908049	0.498447	1.25764	2.11995	0.472555	2.41312	0.0988579	0.461153	0.876987	2.26231	2.78129	0.650891	4.82899	0.814678	2.09687	0.317302	0.943428	1.46518	3.01842	0.69722	0.143567	0.100509	0.125279	0.212984	1.34088	2.07974	1.78378	0.382467	0.838634	10.5665	0.18419	0.506319	0.231361	0.385199	0.109994	0.487922	0.0963956	0.594364	0.349262	2.8899	0.94505	0.539638	0.814828	0.154704
MIR7848	0	0.156706	0.106467	0.200966	0.384134	0.713184	0.354626	0	0.92588	0	0.924851	0	0	1.22634	0	0.291752	0	0.259519	0.330352	0.357982	0.11832	0	0	1.84433	0	0	0	0.626543	0.134132	0.316377	0.318976	0.253819	0.45799	0.33872	0.145508	0	0	0.169571	0	0.133595	0	0	0	0.121201	0.180263	0.138055	1.77829	0	0
MIAT	0.130799	0.119685	0.208428	0.171131	1.6108	0.192523	0.0638204	0.726568	1.69065	0.385767	0.918809	0.0175082	0.537238	0.462927	1.26683	1.4932	0.156753	0.804228	0.346077	1.98825	0.642959	1.21689	0.68735	2.70274	0.0494792	0.398978	0.135608	0.693037	0.339125	0.461976	0.280023	1.84274	0.255308	0.721086	5.35862	0.0681497	0.402899	0.427237	0.177619	0.512515	0.517032	0.0731874	0.133489	0.459646	1.68694	1.6216	1.24578	0.490573	0.0750532
GIMAP7	1.8406	6.93073	2.6198	1.37364	34.2362	8.47346	6.77277	8.80822	15.5236	7.28602	8.9865	2.98987	3.11168	7.11997	17.2865	16.8684	4.3076	26.1489	6.25161	16.1398	5.06175	10.4454	12.2596	20.4032	11.9247	3.13256	3.67367	2.58632	2.70731	10.2782	33.1486	9.81751	4.65884	8.64801	37.2204	7.23273	6.59993	3.5726	4.78446	0.762747	5.75188	0.829476	5.01458	3.05057	19.1923	5.52857	13.7279	7.40529	3.42687
IGHV3-33	38.0525	2.35022	1.8213	0	21.5742	7.93852	7.02218	63.7696	68.6347	28.4899	23.4789	1.03487	2.07723	4.77048	62.9812	69.1209	0.380394	25.2992	2.29662	8.55669	4.65813	3.22046	19.5687	29.9761	1.18415	26.7169	2.041	0.0978822	7.48089	5.01677	4.90849	15.2565	33.8073	40.4813	4.46685	0.595935	0.27476	0.556319	7.07177	1.25226	0.560062	3.6755	1.97963	0.198814	209.946	26.7224	46.9646	1.42233	2.52743
IGHV3OR16-15	0	0	0.0259739	0	0.062476	0.0869947	0	0.0398249	0.225879	0.0510496	0.112814	0.104261	0.0831742	0	0.629524	0.391469	0	0.253251	0	0.0291113	0	0	0.149521	0.032139	0	0.0633574	0.0400908	0	0	0.0771839	0.233454	1.30036	0	0.45449	0.425979	0	0	0	0.0418304	0	0	0	0	0	0.351818	0.0336801	0	0.153179	0
IGHV2-70D	0.452268	0	0.619423	0	4.82735	0.414929	0.990339	0.645824	26.2155	1.36352	13.4878	0.165761	0.0793413	0	8.82293	111.316	0.343423	12.9849	0.615033	1.22187	3.68973	0.307519	4.70682	0.613159	0.271377	0	3.13595	0	0.312151	0.171796	4.65186	9.33283	1.59874	2.01008	16.728	0.155741	0.0779602	0	7.34211	0.12436	0.119184	0	0.607655	0.0564113	47.2784	0.514048	11.7531	0	0.275483
CRTAM	0.195673	0.177502	0.257272	0.0758788	4.19642	0.397184	0.274487	0.493084	1.70131	0.347633	0.337556	0.0860592	0.263888	0.50007	1.04174	1.18969	0.367738	0.89168	0.63197	0.666806	0.612035	1.47184	0.41075	2.19852	0.410938	0.0882504	0.0310235	0.528326	0.106353	0.680891	0.871154	0.704384	0.172923	0.844077	2.14813	0.0555893	0.233997	0.166465	0.233062	0.0958389	0.199813	0.0213406	0.220373	0.160166	1.25234	0.807944	0.893001	0.165949	0.139052
IL16	0.479684	0.773434	0.689968	0.208112	5.89844	1.98632	0.798144	1.99039	3.84551	1.70907	0.965458	0.270058	1.49906	1.56489	1.91461	3.18815	1.08574	4.12223	1.03365	3.09822	1.29345	1.26687	1.70954	3.87482	0.887828	0.82416	0.586007	2.3197	0.476072	1.28232	2.79349	3.02482	0.940897	1.51761	6.40274	0.507468	0.951199	0.7902	0.496881	0.842343	0.68289	0.123905	1.03515	1.0304	3.0545	1.92539	1.28015	0.889666	0.214194
TRBV20-1	0.316843	0.459872	1.14562	0.14744	8.76781	2.35454	0.433623	1.71662	6.33993	0.460558	0.640827	0.139351	2.37621	0.299903	4.70859	6.52839	1.5518	8.94871	1.18489	1.45909	1.3889	1.77736	2.84778	8.37637	0.760469	0.317554	0.160751	0.510741	0.820056	3.53326	2.15818	3.56914	0.840017	4.92866	14.1625	0.130928	1.5156	0.248814	1.59341	0.326709	0.667967	0.138223	1.31467	0.355678	6.65665	1.24918	2.04396	0.716568	0.418153
IGHV6-1	0.210211	0.038138	0.129556	0	2.92929	0.390533	0.992527	0.834308	2.44113	1.98613	3.56384	0.0346699	0.165948	0	28.6468	4.4733	0.143658	24.0009	0.321596	1.56822	0.316755	0.578876	0	1.69926	0.141901	0	0.159977	0	0.195865	2.28427	1.96664	0.772161	0.613044	0.494613	6.30347	0.0651485	0	0.247615	0.333837	0.065027	0.0415468	0	0.0747618	0.029497	2.93938	0.436786	0.0865578	0.15281	0.224074
TNFRSF17	0.292612	0.254822	0.230838	0.0544658	2.41762	0.660397	0.320369	0.914334	5.74355	1.02081	0.849435	0.115825	0.123199	0.332361	5.05681	2.0163	0.239966	3.51674	0.288492	0.582121	0.267225	0.71626	0.678262	1.17822	0.351156	0.211154	0.28207	0.0566018	0.933045	0.809809	1.86345	1.24968	1.17918	2.83049	1.35395	0.0967321	0.0605272	0.122552	0.38725	0.144828	0.0462663	0.51061	0.222012	0.0766447	14.1191	0.436515	1.99207	0.264707	0.142588
THEMIS	0.0101227	0.121211	0.1672	0.0235525	3.7486	0.522392	0.24521	0.681081	1.34552	0.431617	0.104776	0.053425	0.255719	0.454163	0.790937	0.789843	0.581101	1.42341	0.634944	0.497858	0.318934	1.81812	0.398648	1.71993	0.204997	0.0669598	0.0192592	0.0636382	0.160342	0.331233	0.932082	0.511644	0.12882	0.452543	1.44268	0.0533329	0.14919	0.0556448	0.132627	0.0688903	0.0400137	0.0165601	0.201609	0.139202	1.39433	0.608352	0.637733	0.166795	0.0709077
CYBB	4.26523	3.41379	8.44354	4.05676	37.0315	10.549	10.1184	18.2246	34.1736	10.5983	10.6265	1.58096	19.6655	32.7306	19.4088	31.3757	13.6139	18.1756	18.4819	23.6055	29.7258	42.8784	7.44207	48.3608	8.4501	4.67312	1.21958	26.0248	7.81047	22.8464	14.7499	20.6367	8.46598	18.7335	52.4288	2.58874	2.46321	7.42298	10.7752	4.56075	3.26672	1.04867	6.70258	7.30933	41.7644	15.8035	38.8533	3.62269	4.77254
TRBV5-1	0.03345	0.1942	0.560749	0.0311313	4.62159	1.87812	0.0549345	1.16323	3.20319	0.453809	0.358167	0.0662025	0.264065	0.303951	2.67511	0.994284	0.297176	3.41714	0.716438	0.905754	0.531532	1.2896	1.16303	3.9182	0.270961	0.52299	0.0509128	0.0323522	0.436341	0.898505	0.757651	1.1599	0.141893	1.23305	4.73347	0.0829345	0.492991	0.157607	0.424977	0.0620848	0.34378	0.0218889	0.571033	0.1502	2.34564	0.278016	1.26717	0.356635	0.305623
OR7E12P	0.0224146	0	0.0221031	0	0.225954	0.0555228	0	0.016945	0.0640726	0.108605	0.0640014	0	0.0530845	0.178216	0.0412085	0.0908539	0.0153181	0.592654	0.0114305	0.111479	0.0859735	0.0548667	0.127239	0.150422	0	0	0.0341163	0	0.0139233	0	0.187627	0.144909	0.0475406	0.03516	0.438019	0.0416803	0.0695472	0.0352039	0	0	0	0	0.0797178	0.0251619	0.0561354	0.0429914	0.0553774	0	0.0409591
RGS18	0.124358	0.4456	0.310409	0.115738	2.60402	0.46207	0.587168	0.605208	0.788725	0.399191	1.49247	0.369186	0.19021	1.36837	0.707322	0.609082	0.897672	1.83088	0.566794	0.850431	0.336448	1.06542	0.612179	1.49842	0.727541	0.224348	0.118301	0.766767	0.188292	0.884451	1.3969	1.12373	0.354428	0.713231	1.76502	0.0915353	0.325566	0.146486	0.21601	0.120217	0.0860252	0.0457747	0.685539	0.349002	0.895406	0.357782	1.89465	0.35407	0.142029
TRBV18	0.152869	0.184898	0.251242	0.0474243	3.08205	0.841491	0	0.924533	2.29415	0.148139	0.109124	0.100851	0.281587	0.173635	0.936819	1.92775	0.208942	1.95974	0.389784	0.394227	0.558426	0.779575	0.361576	1.70982	0.458636	0.551565	0.155118	0.0492841	0.0633053	0.447955	0.752725	0.748707	0.216154	0.159863	3.84576	0.0315848	0.671951	0.120047	0.283235	0.0315259	0.0402848	0	0.434946	0.228809	2.0844	0.293206	1.175	0.0493896	0.217268
TRAV25	0	0	0.0533657	0	1.57244	0.357477	0.0444383	0.0818239	0.464089	0.104886	0	0.0714045	0.213611	0	0.248733	0.584952	0.258888	1.17074	0.248379	0.179435	0.444801	0.761701	0.460808	1.58478	0.0974174	0	0.0411851	0.157024	0	0.211442	0.373063	0.604316	0.114781	0.466895	1.05755	0	0.209893	0	0.0429722	0	0	0	0.038494	0.121501	1.08426	0.242196	2.13924	0.0524535	0.0329638
IGHD	0.24261	1.00079	0.547732	0.0594191	5.94381	8.9196	17.0803	0.820514	2.71015	0.841421	7.32842	0.429619	0.0302408	1.27631	2.95789	6.74566	0.104716	66.8484	0.371162	28.8601	0.0559733	0.382886	2.71817	7.70444	0.436724	0.0767857	0.592771	0.0370497	0.0475902	0.411587	16.1335	8.64531	2.26139	0.190282	20.1429	0.277015	0.188191	0.0401093	0.344734	2.78868	0.686446	0.593255	1.06266	0	4.37043	0.55513	2.04004	6.78222	0.575554
IGKV1OR2-11	0.0759908	0	0	0	0.045061	0.125491	0.124799	0.0574478	0.543054	0	0.271225	0	0.11998	0.0863135	0.20956	1.12939	0	0.365317	0.0387521	0.0419933	0	0	0.0539215	0.0927216	0	0	0	0	0	0.0742256	0.299341	0.5806	0	0.119201	0.409652	0.0471021	0	0	0	0	0	0.14918	0	0	0.761251	0.0485838	0.563229	0.0736542	0
TRARG1	0.0242596	0.35651	0	0.00564449	1.61117	0.0100155	0.413353	3.52125	4.66356	1.52808	12.4685	0.0120033	0.871386	0.234218	0.00557506	0.045069	0.368883	1.08607	0.0154642	1.23001	0.00332322	0.00371143	0.103285	0.344109	1.25005	0.0145884	0.396939	0.774293	0.00753467	0.017772	0.262798	1.12994	1.25419	0.0951354	33.132	3.22545	0.155248	0	0.544191	0.00375225	2.63232	0	0.323549	2.40332	7.75654	1.25244	0.0349625	0.623111	0
IGHV3-53	0.878486	0.914711	0.659127	0	8.51599	2.17609	3.38727	8.60469	21.1812	5.99613	13.9324	0.403167	0.542745	0.694136	8.11045	36.795	0.0783076	8.49233	2.201	3.54597	0.774363	2.10362	8.56435	7.99265	0.584419	0.459369	0.668554	0.147766	9.27672	2.92866	2.95272	8.28335	3.40244	8.95709	3.60329	0.213073	0.148138	0.839837	0.27296	0.685289	0.181176	0.94977	1.82027	0.214383	45.4049	2.10008	16.9856	0.62935	1.62856
TRAV2	0.0626706	0.0909613	0.463499	0	2.34123	1.08668	0.308769	0.758046	2.41846	0.242925	0.0894732	0.0413449	0.247372	0.142368	1.03696	2.62493	0.942241	2.18429	1.21446	0.380956	0.652459	1.45736	0.844924	1.68231	0.0564069	0.150747	0	0.181841	0.155717	0.489718	0.493741	1.06816	0.265845	1.22883	2.36492	0	0.243066	0.0492146	0.199055	0.0387733	0.0495457	0.0410102	0.178311	0.035176	4.29006	0.360609	0.980615	0.0607435	0.190868
CLEC4G	0.0373022	0	0.0122613	0.127294	0.0368658	0.205335	0	0	0.142173	0	0.213022	0	0.0294477	0.0423694	0.0342895	0.243598	0.0509847	0.567865	0.00634085	0.17178	0.00681318	0	0.0705836	0.227575	0	0	0	0	0	0.00607262	0.0795926	0.0438468	0.0131861	0.00975219	0.955175	0.169557	0	0.00976435	0.0197466	0.0153855	0.0196601	0.00813657	0.0353776	0	0.0519002	0.0238487	0.0409595	0.0120517	0.0302951
CTSG	0.0634916	0.92153	0.0704357	0	2.91782	0.72084	1.08182	1.97994	0.510447	1.35359	3.48984	0.0209433	0.112776	1.73079	0.306409	0.38603	0.705091	12.1328	0.097134	1.80693	0.10437	0.106848	0.641995	0.222727	1.38579	0.133632	1.15966	0.107464	0.0985978	0.139538	4.04076	1.80047	0.151497	0.0248986	6.53525	1.36757	1.46519	0.261761	0.0882275	0.0687421	0.790568	0.0103868	0.462908	0.294004	0.609537	0.223259	0.104575	0.200003	0.00966842
NCKAP1L	1.50459	1.25172	1.71101	1.01909	9.96912	3.23245	2.27999	4.64003	8.6386	1.19475	2.81511	0.365268	4.24902	6.91306	3.87866	6.32249	2.98907	6.30055	3.98648	5.25828	3.72629	6.01567	2.38207	10.5179	2.07115	1.10406	0.574869	5.31919	1.94848	3.98271	3.78638	4.82545	1.89245	4.28925	12.3814	0.729754	1.3555	1.41752	1.7259	1.03401	0.813604	0.354229	1.90619	2.13032	8.67373	2.97794	5.34619	1.57004	0.85629
IGKV1OR2-108	0.0617829	0.448365	0.487396	0.115001	1.68526	0.459125	1.57271	1.58803	8.30058	4.55021	2.11694	0.203796	1.75585	0.701756	5.56571	6.84502	0.16889	7.12833	0.4726	1.77538	0.609364	2.04165	0.350718	0.716163	0	0	0.70528	0.0597553	2.80157	3.68121	10.4347	14.2703	0.327599	5.66948	5.32896	0.114887	0.0958491	0.242588	0.245295	0.344017	0	0.363864	0.48341	0	7.16917	0.790003	3.66338	0.538948	0.301063
IGHV3-74	1.26324	4.1523	4.35989	0	79.8203	5.36862	14.6442	33.4525	52.8638	20.4144	40.8437	0.563755	0.821257	3.33388	254.202	142.214	0.406257	44.6533	3.80833	21.086	1.99511	1.79618	7.51364	55.3982	2.40772	1.07244	2.57305	0.718692	5.83897	7.5485	16.4468	65.3559	14.736	13.8999	13.6698	1.33571	1.21044	2.10072	6.78551	2.13775	0.91056	1.65326	4.41343	0.542202	208.74	4.67952	42.1328	2.01664	6.13301
TLR8	0.140285	0.229065	0.232207	0.17719	2.40944	0.475743	0.45255	1.38627	1.84751	0.325296	1.20169	0.0628009	0.482537	1.58204	0.953347	2.37265	1.00322	1.30064	0.664296	1.07148	1.47148	3.27143	0.29863	3.18807	0.455454	0.192823	0.0305032	0.101761	0.44193	0.880885	0.757371	0.898105	0.440998	1.01382	5.48283	0.102482	0.163227	0.232133	0.322247	0.11779	0.134671	0.0327855	0.231645	0.334645	3.63463	0.365165	2.44263	0.126259	0.161745
CD96	0.261167	0.332367	0.806209	0.172611	10.0349	1.48764	0.422696	1.73402	4.66325	0.674896	0.713301	0.701672	0.68426	0.649179	2.66865	3.10676	1.7693	4.68549	2.1599	1.22152	1.18839	4.6997	1.34557	5.46123	0.892565	0.323209	0.0921768	0.168397	0.474933	1.73579	2.07248	1.66619	0.798779	1.71588	5.67498	0.164228	0.895487	0.219954	0.631159	0.166264	0.400975	0.0891661	0.678462	0.316548	4.34784	1.12042	3.21997	0.561303	0.385022
CR1	0.00951128	0.0469365	0.00281374	0.0938309	0.3666	0.262304	0.0749773	0.189826	0.414621	0.160375	0.40737	0.00752971	0.0120137	0.108033	0.117157	0.341832	0.1326	0.413805	0.171702	0.138759	0.0375239	0.2561	0.118782	0.450288	0.0171213	0.0114392	0.0130291	0.0128788	0.146521	0.0603872	0.158297	0.20124	0.0746405	0.108913	1.06008	0.00707456	0.0236091	0.0164321	0.0800562	0.0105921	0.024062	0.0161823	0.0960688	0.0651301	0.284255	0.0340531	0.117493	0.038719	0.111235
TRBC1	0.0354336	0.167144	0.183442	0.0164887	2.24822	0.819206	0.0727402	0.281265	1.44335	0.137349	0.0885283	0.0350642	0.181821	0.140864	0.325718	1.48412	0.193723	1.25628	0.234905	0.42099	0.300942	0.921557	0.402286	1.69697	0.111622	0.0426157	0	0.0685414	0.154072	0.441283	0.575764	0.437328	0.150307	0.528029	1.96985	0.0658894	0.206142	0	0.253225	0.131533	0.0840385	0.0115934	0.18903	0.0894974	1.22758	0.317156	0.627386	0.051516	0.14029
IGHA1	174.887	275.497	48.7858	1.6793	1027.39	130.768	531.01	451.019	1012.83	443.521	1633.43	21.6985	19.2144	37.0243	1981.3	1867.83	25.9489	2658.06	216.856	263.021	43.5455	264.142	428.01	480.017	207.823	91.3332	263.263	4.05938	168.562	294.79	1173.21	1106.26	485.844	373.718	771.476	65.1481	84.6629	48.6693	56.2206	101.914	75.2473	66.8529	107.754	3.45662	1217.68	84.2883	491.013	134.455	169.758
AC015911.7	0.546373	0.479114	0.269391	0.25425	3.48287	0.582719	0.14955	0.636783	2.57049	0.441222	0.276265	0.0600752	0.233634	0.155148	3.28552	3.86023	0.295602	2.35301	0.62691	0.742247	0.623711	1.18417	1.09847	4.18055	0.881078	0.219039	0.173252	0.110092	0.33939	1.54545	1.31153	0.976727	0.627704	1.57126	5.49193	0.211665	0.459135	0.160898	1.19308	0.0985926	0.41395	0.312842	0.566762	0.166113	4.31409	0.844182	2.08105	0.419245	0.26347
AC119428.2	0.0256581	0.0558609	0	0	0.395583	0.211858	0	0.0387941	0.256705	0.0745924	0.0366314	0.0169271	0.0405107	0.116574	0.141515	0.381337	0.0876738	0.61674	0.0392536	0.113431	0.0281184	0.0628062	0.25489	0.344379	0.0230937	0	0	0	0	0.12531	0.202144	0.150799	0.02721	0	0.449533	0.0318078	0.0199028	0.0805961	0	0	0	0.01679	0.146005	0.0144015	0.171356	0.0656167	0.190172	0.0497382	0.0937723
IGHV3-47	0	0.0472456	0.192594	0	1.58279	0.483794	0.267293	0.984329	10.8402	0.820145	0.511199	0	0	0	1.31658	1.01155	0	0.782432	0.165998	0.39574	0.0356726	0.358558	0.277172	0.317744	0	0	0.19818	0	0	0.317951	0.224394	1.49223	0.621362	1.73606	0.482565	0.0807064	0.0504996	0	0.41356	0.120834	0	0	0.231539	0	4.67393	0.0832451	0.804212	0.189302	0.039655
WDFY4	0.253338	0.351511	0.29931	0.330681	3.10464	1.54188	0.633239	1.09852	3.27358	1.05302	1.10211	0.101961	1.18361	1.38628	1.14974	2.51227	0.557505	2.19642	0.736961	2.49529	0.802333	0.716653	0.953084	3.70646	0.547816	0.270195	0.0594157	1.30217	0.400838	1.15634	1.30156	1.9843	0.353145	1.21217	5.52077	0.169868	0.337408	0.375366	0.487095	0.237568	0.254447	0.0959221	0.553067	12.2574	2.89832	0.786413	1.55884	0.450943	0.13199
TLR7	0.833186	0.695804	1.16842	0.292248	5.48186	1.8841	1.38552	2.38656	2.38767	1.78522	1.10882	0.419846	2.707	7.06684	1.31241	1.50474	3.38206	3.74378	2.46606	4.63434	2.3974	2.71077	0.965545	5.74726	0.889343	1.08264	0.21667	5.6004	0.364106	1.35979	2.98932	3.06851	0.705976	2.76168	2.6859	0.864196	0.561855	1.33489	0.664919	0.973969	0.516363	0.194525	1.24486	0.803707	4.14533	3.17203	6.1892	0.616834	0.336637
CADM3	7.489	2.42737	0.0139761	0.0105524	1.59009	0.608533	0.144312	1.28574	1.55978	0.664746	2.76402	0	0.111886	0.206058	0.0938036	1.45535	0.240208	7.61747	0.0549298	1.92357	0.031064	0.208157	0.325841	34.3655	0.622514	0.0068183	0.237293	0.0657976	0.0281723	0.238112	5.09169	0.786331	0.324652	0.0666962	6.67006	0.295175	0.277046	0.0667793	0.387141	0.0105223	0.246505	0	0.556487	0.814599	1.15477	0.11236	29.2358	0.961601	0.0379851
LINC02244	0.0675213	0.196003	0	0	0.0400388	0	0	0.10209	0.675539	0.130864	0.0481992	0.0890899	0.159911	0.153387	0	0.273687	0.0461441	0	0.103299	0.111939	0.110994	0.0826397	0.0958232	0.205968	1.03314	0	0	0.0653053	0.0419422	0.0989292	0.0332473	0.158735	0	0.158873	3.09395	0.0837047	0	0	0.107231	0.125323	0.160141	0	0	0	0.0563672	0	0.166818	0	0.0411282
MMP9	19.7554	1.63287	13.2021	35.8249	8.8745	5.10327	4.54615	63.7479	202.92	8.21496	5.8248	0.468103	48.2019	0.28632	131.298	88.2306	4.24932	13.1057	17.7635	14.2706	25.9264	21.962	13.6536	44.6157	14.0668	12.3739	32.641	14.9624	23.8818	183.896	4.38565	20.3846	36.5838	6.9344	329.188	0.937486	2.9982	12.1485	146.645	4.6267	12.7543	26.8997	3.47318	101.242	39.749	19.6618	31.7311	24.5503	19.8299
IGKV3OR2-268	0	0	0.153617	0	0.997652	0.46306	0.102335	0.753715	3.38431	0.724612	1.02306	0	0.147575	0.707771	2.34847	3.57813	0.127753	2.02203	0.19066	1.06747	0.239006	0.49572	0.795881	0.228095	0	0	0.237108	0	0.23224	0.36519	0.582968	1.50152	0.198244	1.66166	2.22544	0.656604	0	0.0489334	0.346356	0.269862	0.246313	0.122328	0.132969	0	4.99381	0.278871	0.872379	0.120793	0.0379555
TRBV5-6	0.0567952	0.12365	0.0560061	0.211433	4.88337	0.703434	0.279822	0.68698	1.37998	0.275189	0.0810851	0	0.313853	0.129021	0.887538	1.11268	0.232883	1.70648	0.492374	0.408013	0.0311206	0.382316	0.403007	9.49406	0.357831	0.273229	0	0	0.141118	0.388331	0.475419	0.467318	0.120461	0.445452	3.6358	0.0352039	0.176223	0.133802	0.315689	0	0.314306	0	0.403986	0.0956348	2.32324	0.290491	0.280637	0.0550488	0.138379
LINC02273	0.0325351	0.0944442	0.0748605	0.0403731	1.51126	0.87756	0.0623374	0.213165	0.519263	0.231208	0.185798	0.0357733	0.17979	0.0123182	0.418704	0.637401	0.125996	0.690804	0.160385	0.239723	0.112907	0.438019	0.530983	0.330819	0.0878501	0.130433	0.0082534	0.0104891	0.0269465	0.381352	0.202923	0.210338	0.0920079	0.348742	1.49813	0.0201666	0.235548	0.034066	0.0947269	0.0134193	0.0943117	0.00709674	0.069427	0.0304358	0.461729	0.0416018	0.169694	0.157673	0.0396352
GIMAP1	0.675073	1.65262	0.448234	0.414664	4.10179	1.03306	1.4967	1.10915	2.27063	1.36943	1.17582	0.534429	1.29323	1.17572	2.75111	3.32005	0.62743	4.1378	1.00524	2.00951	0.695416	0.977702	1.82346	5.4282	1.82281	0.525033	0.434976	0.831383	0.436109	1.24625	4.43649	1.48387	0.887721	1.48604	7.03578	1.10746	1.64775	0.636154	0.943438	0.200475	1.69003	0.262106	0.518597	0.391539	2.16405	1.35522	1.53441	1.02946	0.41668
IGKV2-28	0	0.0405827	0	0	0.696367	0	0.0918391	1.05689	6.27423	3.90176	1.63667	0	0.0441463	0	1.85058	6.42228	0	0.739298	0.0285176	0.123611	0.0306418	0.205328	0.0396806	0.10235	0.0503323	0	0.0851158	0	0.138947	0.0273112	0.275356	19.1282	0.118608	3.07019	0.301462	0	0	0.0439145	0.0444046	0	0.04421	0	0.0397771	0	15.4523	0.250269	3.96057	0	0.0681252
RPL32P1	0.0531936	0.115809	0.0786818	0.148519	0.662397	0.0439217	0.218398	0.201067	0.874317	0.257738	0.151886	0.0701854	0.377936	1.63133	0.0977947	0.179676	0.218115	0.703234	0.162759	0.764278	0	0.358072	0.113235	0.25962	0.239386	0.0639756	0	0.102896	0	0.155874	0.314309	0.531473	0	0.125161	2.68834	0.0989145	0.165048	0.0417724	0	0.13164	0	0.0696173	0.340531	0	0.710501	0.340087	0.6571	0	0.032401
AOAH	1.27998	1.45196	0.750578	0.346967	14.4579	1.7187	2.5715	3.61692	4.33823	1.77626	3.47294	0.348428	2.79103	4.24158	4.19807	4.19337	2.08918	4.94359	2.34795	2.26964	1.85553	3.79476	2.30148	11.6452	1.40931	0.762239	0.208061	2.42186	1.31228	4.56401	3.87946	3.10039	1.2915	3.53803	8.75497	0.473719	0.80008	0.829497	1.80085	0.584317	0.859639	0.243958	1.29055	1.19971	6.03774	1.21559	4.78441	1.42732	0.980246
TRAV12-3	0	0	0.269503	0.101742	7.8762	0.586723	0.269303	0.702475	2.92963	0.105937	0.0390184	0.0721204	0.345204	0.186255	1.40687	5.50197	0.896514	1.77371	0.696858	0.42288	1.13813	1.10383	0.504213	1.80075	0.344379	0.131479	0.041598	0	0.10186	0.880941	1.26498	1.799	0.115932	0.857411	3.31495	0.0338805	0.890388	0.085848	0.564239	0.169087	0.0432128	0.0357683	0.544319	0.0920395	2.14464	0.384409	0.990317	0.423835	0.166471
GRAP2	0.119793	0.552292	0.17893	0.0918146	2.70768	0.645841	0.292209	0.700519	1.65173	0.378987	0.254023	1.70146	0.317083	0.37218	0.764347	1.40432	0.344321	1.51595	1.64582	0.887842	0.283796	0.623116	0.765023	2.17532	0.329803	0.237299	0.128705	0.252169	0.54058	0.51278	0.76855	1.3729	0.269023	0.513989	2.45729	0.115747	0.418151	0.118974	0.290961	0.0719341	0.25069	0.244391	0.170418	0.118655	1.40888	0.574411	0.858866	0.198069	1.31127
TRGV3	0	0	0.140172	0	0.313078	0.0670685	0.100048	0.153515	0.203165	0.157427	0	0.107173	0.0641232	0.230652	0.186666	0.49386	0.0555104	0.146433	0.227822	0.157103	0.200285	0.596484	0.230547	0.792882	0.109663	0	0.030908	0	0.126139	0.396699	0.699927	0.286433	0.172279	0.222975	0.957858	0.151043	0.409545	0.159466	0.225744	0.0251268	0.0642157	0.0265764	0.0288884	0.0911826	0.47466	0.233691	0.200679	0	0.0494764
IGHV3-30	11.3348	5.14111	3.86715	0.0470942	56.8011	6.6015	10.2632	97.3184	422.946	45.6525	71.5565	0.801189	1.63782	4.31067	90.3319	123.371	0.691626	83.2564	7.71562	20.1054	2.82815	7.64859	5.67314	82.5191	1.95841	2.1909	0.73168	0.587293	235.302	5.2639	20.4811	159.881	86.6111	76.9145	36.8942	0.846855	1.25605	1.15237	5.34401	5.04035	0.880097	28.9404	2.05161	0.14201	1036.26	21.5785	50.7151	3.67844	10.5412
C16orf54	0.253107	0.618396	0.357746	0.235562	7.17918	2.0063	0.471098	1.28839	4.64856	1.08739	1.26474	0.256034	0.732641	0.527064	2.52829	4.62238	0.864867	4.57306	0.864794	1.7437	0.661081	1.76574	2.34676	4.84353	1.0783	0.284116	0.211884	0.49776	0.518834	1.2691	2.44688	2.08755	0.518937	1.48886	7.39647	0.402673	0.51701	0.337896	0.830719	0.135714	0.360179	0.0772927	0.876174	0.37884	5.66271	1.09499	1.88292	0.907699	0.26723
FAM30A	0.0529568	0.016013	0.00652763	0.00205358	0.252527	0.415399	0.0199307	0.0567154	1.03915	0.228793	0.0441029	0	0.020903	0.0100251	0.60444	0.767679	0.0301589	0.487951	0.0123776	0.108522	0.0229721	0.0270059	0.280262	0.445582	0.011916	0.00265378	0.00839619	0.00853647	0.102797	0.115307	0.0836598	0.234726	0.10296	0.415346	0.911455	0.00547079	0.0102695	0.0190604	0.0595716	0.00136515	0.0104665	0.075083	0.0816147	0.00371548	2.88461	0.0409109	0.234413	0.0898247	0.0376329
CD3E	1.39568	2.76588	2.0304	0.278342	30.0576	7.50329	1.63092	7.44373	18.7313	3.01709	1.85572	1.02193	3.4083	0.452934	14.0561	20.3544	4.29737	23.594	5.68215	5.06407	4.29858	12.45	7.83023	26.2508	4.72105	1.7708	0.478552	0.712021	1.76249	6.85373	8.19764	5.64725	2.60236	7.37383	34.126	0.461068	4.46133	0.939438	3.03853	0.654729	2.62509	0.336214	2.93461	1.20088	22.1949	4.93221	9.46665	5.22523	1.6769
TRBV10-3	0	0.172036	0.613633	0	2.8817	0.440411	0.340653	0.089606	1.27057	0.287154	0.211526	0	0	0	0.599259	0.640586	0.486018	1.78067	0.453336	0.294752	0.519579	0.616542	0.420529	3.10945	0.746779	0.49894	0.0902042	0	0.0368134	0.434159	0.612816	0.766286	0.377095	1.48742	2.67568	0	0.781509	0	0.0470592	0.036666	0.140559	0	0.337241	0	1.48423	0.341011	0.146419	0.0574423	0.0721979
SLC22A3	0.390849	0.132367	0.00642364	0	1.13565	1.81262	0.149774	0.65497	1.42915	0.265128	1.07881	0.1719	0.0617099	0.0887885	0.42515	0.572088	0.160264	1.20566	0.0132877	1.93668	0.1749	0.673694	0.416007	1.82415	0.0644939	0.0313381	0.27266	0.17011	0.105206	0.346774	0.715284	2.07888	0.179612	0.122619	4.18326	1.08615	0.0151589	0.0460395	0.191385	0.0685134	0.0308995	0.0213135	0.342882	0.274222	0.603624	0.154095	0.461357	0.202043	0.0674537
GVINP1	0.0801245	0.136927	0.179687	0.0841924	5.65702	0.930486	0.367171	0.429871	1.81568	0.578582	0.343175	0.0665007	0.204042	1.15963	0.648623	1.15591	0.86375	1.25186	0.759207	0.80271	0.621733	1.58802	0.447501	2.86042	0.134927	0.251793	0.116053	0.222485	0.234405	0.679123	1.15432	1.06183	0.47145	0.766274	1.6633	0.291578	0.31076	0.154258	0.168293	0.110337	0.0694744	0.0169134	0.42285	0.149425	1.82325	0.371806	1.25372	0.13528	0.135395
CMA1	0	0.793897	0.0573809	0.108312	1.57343	0.480467	0.382255	0.809419	0.365938	0.766888	2.27627	0.0614216	0.0367493	0.713814	0.149771	0.172965	0.827146	5.343	0.0237393	0.771744	0.0510152	0.0284873	0.412899	0.113601	0.796078	0.0559871	0.141708	0.0225119	0.0144582	0.0454701	2.07443	0.670305	0.123418	0	2.46245	1.25517	0.234713	0.0548346	0.0924109	0.0864019	0.184012	0	0.314566	0.117579	0.213738	0.104167	0.0958417	0.0676801	0.0141776
TRBV14	0	0.0779668	0.0529713	0	1.49711	0.310481	0.0441099	0.324877	0.806155	0.0520555	0.0766913	0.0708769	0	0.0610147	0.197517	0.834655	0.110132	1.16209	0.191756	0.296849	0.20604	0.164363	0.457403	1.01594	0.0483488	0	0.163523	0	0	0.288584	0.687711	0.410424	0.113933	0.505577	2.09947	0	0.291679	0.0421839	0.0853094	0	0	0	0.114629	0.0301509	1.07625	0.103031	0.176953	0.0520659	0.0654404
LGI2	0.132322	0.293006	0.264313	0.161042	0.997905	0.355788	0.298106	1.05676	4.87597	0.371531	1.40958	0.384994	0.393732	0.331424	0.626887	4.17617	0.422002	1.72487	0.456778	1.76619	0.699022	0.660257	0.698177	0.678939	0.406151	0.293802	0.299521	0.265803	0.554286	0.497108	1.11432	1.65707	0.708822	0.505603	8.98513	0.391165	0.20265	0.706062	1.57067	0.346354	0.311148	0.0421841	0.417511	0.647484	1.12729	0.420823	0.760006	0.470261	0.334797
CD84	0.716375	0.490808	0.946931	0.824623	7.46467	1.58773	1.34097	3.85688	6.7681	1.41125	1.60646	0.253403	2.24538	4.35751	1.87157	2.91008	3.60737	2.3705	4.12428	4.05382	6.11138	5.37458	1.25074	6.19344	0.820817	0.804896	0.496762	4.04323	1.47696	2.42145	2.10368	3.23944	1.16205	3.01076	8.15719	0.503924	0.681813	1.16769	1.24621	0.879129	0.417308	0.151119	1.72982	1.56339	5.72854	1.97063	4.42663	0.582429	0.413388
IGLV3-1	7.50725	1.47138	4.32289	0.101998	99.7884	5.88198	8.81933	23.4056	133.105	8.49629	41.8937	0.542262	0.908438	0.746894	352.954	51.234	1.12346	99.3796	7.26553	9.81123	53.8064	15.8278	16.8753	30.9237	0.147962	4.87693	3.50301	0.317994	19.8445	22.3465	25.2553	49.4357	41.3175	212.055	60.1883	1.42656	0.595083	0.516382	2.5237	1.69511	0.693142	3.01208	3.93674	0.338326	429.685	16.501	67.5559	2.33695	5.04007
CTSE	0	0.0059256	0	0	0.648805	0.026968	0	0.0246911	0.040846	0	0.00582865	0.00538675	0.083797	0.0463721	0.0450346	0.0551609	0.0390609	0.0686935	0.00416393	0.112805	0.00894819	1.03932	0	0.0498149	0.0146983	0.0883826	0.012428	0	0.1268	0.0159511	0.0201027	0.724634	0.0606138	0	0.0165065	0	0	0.0128242	0.0129673	0	0.00645522	0.00534314	0.00580797	0.00458303	0.109062	0.015661	1.58022	0	0.00994714
TRAV8-3	0.0639571	0.0464143	0.409945	0	5.72672	1.53146	0.157554	0.725257	3.9764	0.433846	0.0456549	0.126581	0.403919	0	1.05825	2.11713	0.961583	2.99779	0.880615	0.706866	0.420539	1.95694	0.953034	2.34115	0.230259	0.461525	0	0.0618581	0.278098	2.1865	0.566862	0.902137	0.271302	1.35438	4.13737	0.0396432	0.49611	0.0502249	0.507853	0.356123	0	0.125556	0.909858	0.251287	2.50941	0.572462	2.05416	0	0.428529
TRBV12-3	0	0	0.0788742	0	1.26479	0.396262	0.0875728	0.322494	0.609708	0.0516736	0.152257	0.0351785	0.084191	0	0.343118	0.756487	0.145766	0.769041	0.135964	0.265205	0.321402	0.717895	0.264861	2.04951	0.143983	0	0	0	0.132492	0.0781274	0.446359	0.595451	0.395842	0.376401	1.72475	0.0330521	0.206814	0.083749	0.211709	0.0659809	0	0	0.189646	0.119719	0.934813	0.170459	0.35131	0.051684	0.0324802
IGHJ1	0	0	0.413584	0	1.24351	0.692612	0	0.951202	6.89365	1.2193	1.49696	0	0	0	12.3372	2.26669	0.286626	6.0488	0.213882	1.15885	0	0	6.2497	0	0.377493	0	0	0	0	0	1.85865	5.17645	1.77911	1.97369	1.69572	0	0	0	0	0.518965	0	0	0	0	6.30228	0.268145	3.10859	0	0
IGHV3OR16-13	0	0.0896729	0.0304623	0	0.952537	0.204056	0.558059	0.513775	2.82573	0.419098	1.01437	0	0.195094	0.0701756	2.61248	1.5443	0	1.03955	0.28356	0.273135	0.0338536	0.0756165	0.613757	0.113078	0	0	0.235093	0	0.191889	0.331912	0.456326	1.85187	0.655198	0.920685	0.416325	0.0382955	0.0479245	0	0.539648	0.114672	0	0.161717	0.0878928	0	2.8883	0.0395001	0.864965	0.0598831	0.112899
XPNPEP2	0.04985	0.122096	0.0491574	0.0115986	0.650321	0.0514511	0.143269	0.226114	0.632332	0.0483075	0.983029	0.110993	0.167251	0.0353885	0.137471	0.416747	0.119236	0.883701	0.0317767	0.416657	0.0921881	0.0266926	0.274137	0.402968	0.0616931	0.00749428	0.0806168	0.168749	0.201275	0.097384	0.549217	0.344251	0.270934	0.0781959	3.31296	0.702952	0.0435018	0.166373	0.202866	0.0154207	0.0886727	0.0774741	0.110808	0.136403	0.593015	0.223097	0.123159	0.150991	0.151822
IGKV1D-43	0.0409951	0.0297505	0.121276	0	0.534803	0.0676989	0.336628	0.123966	2.49019	0.317812	1.11202	0	0.0323629	0.0465639	1.01747	2.4925	0	0.246348	0.14634	0.0453085	0.044926	0.0752612	0	4.42685	0.0737955	0.0493045	0.0935954	0	0.203719	0.460492	0.82762	0.240937	0.304322	0.257223	0.165748	0.152462	0	0.032193	0.0976568	0.0507259	0	0	0.1458	0	0.171115	0.078629	5.9419	0.0397345	0.0499414
CLEC17A	0.0487251	0.0707206	0.0192193	0.018139	0.722326	1.27134	0.0800207	0.0442024	0.438738	0.585496	0.326949	0.0128579	0.184633	0.55344	0.403108	0.842665	0.00665976	0.99552	0.00496955	0.301571	0.0106795	0.0417445	0.373402	0.909628	0.0964815	0	0	0.556087	0.0242133	0.104705	0.311898	0.103093	0.09301	0.0764314	1.15574	0.0422825	0.00755914	0.0153053	0.0773807	0.0542618	0.0616333	0.0191307	0.159428	0.0711065	0.707763	0.105916	0.160507	0.0283361	0.0237434
TLR10	0.23273	0.228946	0.0739488	0.0336929	2.297	1.76791	0.140143	0.195489	1.43401	1.02239	0.387639	0.0989453	0.718569	1.87391	1.29311	1.40102	0.236804	1.45447	0.150331	0.771653	0.0680122	0.395611	0.697258	1.93099	0.377045	0.0373203	0.0118076	1.08044	0.0706762	0.646609	0.944777	0.63831	0.197445	0.385347	1.98297	0.0512907	0.0401171	0.0934108	0.33264	0.220779	0.049064	0.00338429	0.268545	0.0870851	1.25637	0.657995	0.515354	0.280714	0.0472531
ITK	0.0811134	0.255694	0.257456	0.0802089	4.99174	0.858117	0.210225	0.668775	2.77151	0.400387	0.788911	0.0936459	0.22812	0.336857	1.28387	1.85282	0.654802	2.15382	0.685098	0.592518	0.593071	1.85055	0.809386	2.58564	0.310277	0.112797	0.0771622	0.144645	0.179498	0.744012	0.795056	1.0175	0.306444	0.87475	4.31972	0.0974123	0.36965	0.0796219	0.340157	0.0768435	0.1523	0.0149284	0.4796	0.116665	2.27688	0.452144	1.35478	0.211289	0.259389
CADM3-AS1	0.0167507	0.340371	0.00825897	0.00389739	0.216039	0.0553238	0.0653349	0.0253264	0.0957644	0.255659	0.385621	0.0248641	0.00661178	0.0951305	0.0153978	0.11316	0.0973031	0.463029	0.00854213	0.289268	0.00458921	0.00512531	0.115888	0.309134	0.113074	0.0151094	0.0191216	0.0121507	0.00780376	0.145209	1.27019	0.142749	0	0.0656888	0.860669	0.236207	0.129934	0.0131541	0.0133009	0	0.119184	0.00274031	0.0506379	0.0517104	0.0769096	0.0615787	0.44488	0.0771191	0
CD1C	0.212774	0.915445	0.412143	0	2.59552	1.83216	0.611514	1.12598	3.05196	1.13405	1.94197	0.310821	1.53574	1.00124	1.95589	5.12335	0.488163	7.37939	0.124007	5.34154	0.0582942	0.102306	2.54509	0.723228	2.0382	0.0548362	0.0578313	0.367484	0.169932	2.87995	5.33576	4.71626	0.693048	0.500644	17.7277	0.423919	0.318306	0.358049	0.386181	0.0470143	0.444565	0.0497266	1.32969	0.580074	0.761251	1.36035	0.26284	1.72351	0.129604
GPR171	1.68886	0.432054	0.251607	0.0791549	5.9151	0.421355	0.239447	0.96445	2.56143	0.470964	1.68259	0.176343	0.297342	0.469219	2.92622	3.57051	0.739	1.89832	0.904618	0.483426	0.712358	2.79566	1.33632	2.72041	0.973279	0.204579	0.0832191	0.0705079	0.188682	1.12151	1.14867	0.692665	0.296354	0.84812	4.33929	0.158153	0.584332	0.124037	0.376264	0.0902046	0.268954	0.787121	0.795099	0.238687	2.22131	0.497152	1.91114	0.247306	0.532857
ERVFRD-1	0.733258	0.0488195	0.0165842	0	0.151584	0.0777639	0.0220958	0.0305136	0.0192297	0.0782277	0.0480208	0.026628	0.0212425	0.221588	0	0.0136337	0.0781546	0.0485098	0.0205833	0.200744	0.0331748	0.0164668	0.0190937	0.0123123	0.0544931	0.0404534	0.0102391	0.091089	0	0.0131417	0.132497	0.0830275	0.00713402	0	0.113327	0.129262	0.0313091	0.0158483	0.0213668	0.0332957	0.0319098	0.0176083	0.0143551	0.0151033	0.0168476	0.0129027	0.00554002	0	0
AC090559.1	0.176356	0.938544	1.07242	0.692999	2.45172	0.873699	1.43205	1.99983	2.22652	1.3482	1.86037	0.245617	1.87176	0.489653	0.8646	2.22392	2.0087	1.81337	0.839385	2.85871	2.19035	1.6548	1.01501	2.8213	0.599647	0.471338	0.149125	3.25975	0.852034	1.25367	1.92972	2.74093	1.24682	1.36781	6.272	0.619438	0.379995	0.707841	0.497906	0.666775	0.0929483	0.115403	0.836284	0.989859	3.45156	2.14227	2.04943	0.284889	0.572913
IGKV1-27	1.48441	0.994383	12.6955	0	163.078	3.48844	9.0012	17.0918	56.1002	6.63912	18.3397	0.979289	0.721134	5.51209	122.334	53.7656	1.28757	48.5804	4.04695	13.2825	9.97945	10.3067	0.121535	22.3617	2.82625	2.33461	4.77941	0.386532	10.1782	5.57663	22.6866	13.9587	1.51364	112.752	9.27174	2.61873	0.620008	1.5692	5.25881	1.55418	0.180543	1.27024	6.8225	0.737039	190.645	2.4091	62.7215	0.442696	2.7473
SIT1	0.443748	0.596355	0.753614	0.137663	7.86477	2.89049	0.566814	1.54066	5.98996	1.54487	0.351959	0.162638	1.37529	0.653368	4.80425	7.96074	0.550356	6.91335	1.35775	1.56214	1.51293	2.04168	3.53358	10.849	1.13902	0.513926	0.100061	0.254331	0.704421	1.89429	2.16072	2.3955	0.993461	3.10655	10.8755	0.0611228	1.26211	0.258126	1.34418	0.213531	0.623671	0.376416	0.607897	0.470463	6.90122	1.2504	2.35506	1.49739	0.430467
IGKV1OR22-1	0.0605816	0	0.268829	0	0.323313	0.0500219	0.0497462	0.732778	0.735989	0.293535	0.432454	0	0.143476	0.275244	0.445509	0.7776	0.0414015	1.09214	0.061788	0.267824	0.663906	0.185365	0.214937	0.147839	0	0.0728611	0.138313	0	0.075263	0.118349	0.656265	8.33161	0.321229	0.0950297	0.244938	0.112653	0	0	0	0.0374808	0	0	0.0430919	0	0.354017	0.116196	0.648582	0.0587188	0.147605
CD5	0.650015	1.1056	0.647661	0.195351	10.7965	3.08611	0.656075	3.18387	8.75816	0.97766	1.61918	0.281417	1.16526	0.446065	5.17848	8.43481	1.25863	9.32578	2.00615	2.57056	1.61761	3.26096	3.68509	8.86899	1.5967	0.863203	0.118517	0.451866	0.668744	2.34125	2.91393	3.51785	0.768316	3.55808	13.3047	0.20565	1.97483	0.345618	1.38715	0.330939	1.34895	0.1152	1.59899	0.558667	7.20689	1.48483	3.79177	1.67351	0.730003
AGXT	0.0195644	0.0106485	0.0120578	0	0.00290032	0.0242313	0	0.0147903	0	0	0.0139658	0	0.00386119	0.0055555	0.00449606	0.00660842	0.0835644	0.164593	0	0	0.00536008	0.00897936	0.0104118	0	0.00880449	0.00588248	0	0.00473057	0	0	0.00240836	1.08373	0	0.00767228	0.0593257	0.0151585	0	0.0192046	0.0116514	0	0.00386676	0.00320061	0.00347905	0	0.00408311	0	0	0.00948139	0
LINC00861	0.0152406	0.127193	0.0450867	0.0212763	2.31583	0.792801	0.0625738	0.282281	1.17628	0.118152	0.0625562	0.0502726	0.0661732	0.142815	0.886115	0.990983	0.578059	1.19518	0.165157	0.372679	0.127353	0.655191	0.708345	1.40401	0.0720164	0.0320772	0.0289965	0.0294809	0.0378682	0.588021	0.437135	0.26424	0.1293	0.4363	2.86018	0.0543189	0.177331	0.0299208	0.139172	0.0235728	0.147598	0.0224395	0.14906	0.0449103	0.833356	0.228982	0.316917	0.151413	0.125325
MMP8	0	0	0.0437884	0.224348	0.00376164	0	0	0.0383653	0.0725336	0.00614733	0	0	0.0200315	0	0.0699753	0.0428548	0.156068	0.00762404	0.439957	0.206827	0.0764709	0.081522	0.0135039	0.0657924	0.0228384	0	0.0144831	0.00613543	0.224607	0.0557663	0.0124943	0.0111849	0.235456	0	0.123965	0.00393203	0	0.00996316	0.115855	0	0.0050151	0.0996268	0	0.24568	0.0370699	0.0202786	0.0470176	0.0122971	0.0695519
TRAV16	0.13258	0.0481072	0.163422	0	2.2799	0.547353	0.0544335	0.451026	1.27907	0.642386	0.236601	0	0.104663	0	0.914039	1.03	0.36242	1.51373	0.439465	0.549486	0.181616	0.811326	0.564454	0.889733	0.894967	0.239179	0	0.128229	0.123532	0.3885	0.489614	0.350641	0.421796	0.883863	2.14414	0	0.154262	0.104113	0.105275	0.0820249	0.052407	0	0.235761	0.111622	1.38348	0.381435	0.764287	0.128503	0.0403782
IGHV3-35	0	0.21622	0.235042	0	0.8127	0.492019	0.293584	0.991053	3.06603	1.27038	0.850728	0.0393115	1.41124	0.541464	0.985963	0.925874	0	1.93363	0.0607751	0.428079	0.0653022	0.182327	0.0845653	0.508955	0.107266	0.0716666	0	0	0.851335	0.640247	1.73113	1.68103	0.189578	0.934719	0.401538	0.221612	0	0	0.0946328	0.184332	0	0.23396	0	0.0334461	5.72065	0.152389	0.883315	0	0.145185
LYZ	10.064	19.9187	9.05852	15.1426	261.297	40.2115	61.7665	80.157	219.94	21.0866	43.8808	13.189	45.6682	37.0597	163.736	336.698	58.8662	64.0725	199.771	40.3717	88.3605	336.571	32.7406	325.458	40.194	25.5906	9.2397	14.3972	848.144	144.572	83.0741	64.0312	45.8636	162.055	626.417	13.4647	19.8712	18.3403	41.282	9.48495	11.2502	9.83798	46.4689	26.0578	408.317	23.9507	104.374	16.8008	12.0117
JCHAIN	9.28197	36.2708	5.20377	0.120819	391.84	26.1758	112.782	65.6556	235.306	104.805	379.043	10.8595	7.72718	93.47	194.178	104.345	18.0274	375.105	24.7924	86.6816	12.6332	46.2116	47.5778	30.3572	64.6959	12.0065	82.8397	1.36857	115.007	40.3421	365.064	128.255	62.323	80.3137	76.8756	35.2361	12.4161	11.3056	16.8436	13.6457	4.6081	10.9415	40.4448	0.47362	382.479	14.9395	119.289	14.5077	35.6386
IGHV3-65	0.0639571	0	0	0	0.265477	0	0.052518	0	0.365646	0.0619781	0.136965	0	0	0	0.117583	2.41957	0	0.230599	0.130462	0.0706866	0	0.0391388	0	0.156077	0	0	0	0	0	0.0312357	0.125969	0.563836	0.135651	0.451461	0.0861952	0	0	0	0.0507853	0	0	0	0	0	2.40263	0.0408902	0.105342	0	0.194786
LILRB5	0.285943	0.0406001	0.21914	0.196699	0.683763	0.133449	0.686536	0.620308	0.653012	0.0752976	0.838653	0.022555	0.164393	0.13062	0.388559	1.18002	0.365339	0.705995	0.576935	0.89828	0.636941	0.23775	0.524891	0.561271	0.156656	0.0411187	0.0614988	0.210425	0.361031	0.10322	0.313734	0.610114	0.362567	0.390032	2.75411	0.277417	0.122956	0.214785	0.48866	0.0192292	0.196573	0.069151	0.42226	0.151773	1.12088	0.284157	0.0895861	0.0933877	0.0965519
TRBV7-9	0.0628512	0.547341	0.278901	0.175483	8.75834	1.60878	0.412879	1.14035	5.79409	0.791783	0.942176	0.373176	0.396935	0.571112	3.0043	3.43923	0.687241	5.061	1.21795	1.66715	0.998729	1.84618	2.27449	10.238	2.88504	0.453544	0	0.243154	0.702744	1.3813	1.51644	1.84695	0.733179	1.18308	6.39521	0.116873	0.975064	0.296139	2.24582	0.07777	0.496885	0	0.983538	0.423329	4.40736	0.843846	1.91512	0.791942	0.574254
GAPT	0.333171	0.440049	0.4731	0.117829	4.47284	2.36584	0.809801	1.44574	1.63809	2.0082	1.27477	0.483557	1.86742	4.6017	0.75953	1.4675	1.47543	3.69988	0.584466	2.50026	0.397979	0.599422	1.15841	2.5611	1.49336	0.641124	0.420898	4.07952	0.107617	0.868902	2.52641	1.86022	0.289724	1.20203	2.12833	0.768227	0.697783	0.769209	0.391542	0.803897	0.568935	0.122091	1.08065	0.661993	1.85793	2.79041	1.46517	2.1959	0.174528
KRT1	0.48212	0.0636144	0.00864404	0	0.109157	0.0144758	0.10797	0	0.369596	0.305805	0	0	0	0.159305	0.00805785	0.0177654	0.155755	0.916558	0	0.0145322	0.0144095	0.059007	0.00622004	0.0213915	0.0315589	0	0.0266842	0.194997	0.00544507	0	0.0302139	0.0360631	0.297472	0	0.0826961	0.233636	0.00679958	0.0206511	0.0348027	0.00542327	0.367291	0	0.00623516	0.0246006	0.0878131	0.162525	0.0216568	0	0.0533939
AC135068.2	0.185349	0	0.121849	0	0.549541	0.102028	0.152198	0.373655	1.1038	1.07768	0.617441	0	0.0487736	0	2.04455	1.2104	0.0422225	0.594028	0.0315066	0.238993	0.135414	0.415891	0.613757	0.113078	0.055608	0	0.0470187	0	0.614043	0.844868	0.182531	0.254179	0.0655198	1.50217	0.208163	0.0382955	0	0.0485175	0.0490589	0	0	0.0808586	0	0	5.51871	0.0790003	0.915845	0	0.0376329
CCDC69	0.685774	4.72314	2.33456	1.79276	10.1196	3.41187	2.11259	6.64057	9.38323	4.01272	10.8819	0.478352	1.66895	2.87262	4.25612	6.4092	3.39703	10.0268	2.35223	6.12138	2.22348	3.85715	3.12732	6.79801	3.5776	0.803763	1.21665	1.99825	1.80432	2.70924	10.9755	6.6772	2.70056	4.61122	21.7751	3.79043	2.16168	1.21427	1.54345	0.50535	1.87164	1.30911	2.11274	5.18531	13.3568	2.84568	3.63675	2.34969	0.800843
TRAV8-4	0.372015	0.269975	0.0917116	0.0432784	2.61959	0.921513	0.114554	0.843711	2.22652	0.0901259	0.132779	0.0613561	0.220261	0.0528187	1.19689	1.19376	0.953382	1.78842	0.616563	0.642434	0.305765	1.02445	0.725927	1.84405	0.292979	0.111855	0.0707786	0.134927	0.115542	0.454216	0.52664	0.437283	0.147943	0.875327	2.28748	0.0288237	0.32464	0.0365174	0.2954	0.0863098	0.0735262	0.0304297	0.330769	0.208806	1.86336	0.475686	1.14888	0.270432	0.0566499
TMEM273	1.5922	2.00384	0.232121	0.285535	3.10217	1.10939	0.916498	1.49159	2.23408	1.85049	3.67402	0.247768	0.547037	2.08486	1.43443	2.63008	1.40261	4.30394	1.35145	2.9319	1.51589	1.79332	1.66653	2.65917	1.44258	0.814319	0.491124	0.685555	0.670302	1.2607	10.1997	2.92234	1.02656	1.50185	7.94519	1.93119	1.36635	0.66463	0.655246	0.163632	1.00783	0.197302	1.04976	0.887736	1.91207	1.09573	1.86011	1.4407	0.338313
IGKV3-7	0.441088	0.213401	0.531618	0	1.97621	0.242803	0.643906	0.889214	7.63522	6.88653	2.58889	0.161663	0.23214	0.501006	4.41505	15.7267	0.0334933	6.89155	0.474865	1.70625	0.402819	1.31964	1.04329	0.807303	0	0.0589438	0.335681	0	0.426208	0.837748	2.87175	3.80215	0.675663	2.07571	42.933	0.303782	0.11405	0	3.26898	0.363859	0.0387458	0.256567	0.766939	0	6.09614	0.344672	2.01806	0.665039	0.179116
XCR1	0.0322922	0.102527	0.0159218	0.0338105	1.28535	0.39662	0.162414	0.268536	1.00385	0.19167	0.193055	0.0985298	0.165702	0.0183394	0.526893	0.539928	0.11586	0.470574	0.156443	0.635728	0.0663537	0.0988067	0.346572	0.852067	0.130791	0.0242735	0.00921576	0.0117122	0.0351032	0.378505	0.480994	0.279939	0.12842	0.414733	1.67009	0.052542	0.0407044	0.0443778	0.14103	0.0174813	0.0287206	0.110939	0.117719	0.149532	0.788514	0.165165	0.40223	0.0978102	0.454861
TRGV7	0.123566	0.134509	0.365547	0.402502	4.10324	0.255069	0.405861	0.700602	1.58947	0.478969	0.176412	0.122278	0.341415	0.701756	0.56793	0.751282	0.548892	0.445521	0.441093	0.955972	0.880193	0.907398	0.394558	1.47002	0.055608	0.445835	0.0940373	0.537797	0.230266	0.39226	0.790965	0.762536	0.262079	1.06606	0.915916	0.153182	0	0.242588	0.245295	0.19112	0.0488439	0	0.395518	0.485489	1.13469	0.474002	1.17025	0.0598831	0.225797
CST7	3.49419	2.46769	3.04095	1.17857	27.0749	3.2724	1.48276	9.34292	17.1442	3.74967	6.29429	0.665252	3.72111	1.54492	20.8455	17.9495	2.74051	18.4889	4.73575	6.06491	3.36665	13.1885	6.52299	12.161	5.08681	1.91789	2.32009	3.92387	1.57324	9.63205	8.44099	5.92654	4.30239	6.695	26.6271	0.886685	3.94739	0.883957	3.05389	0.594857	5.54336	2.39393	2.18518	1.50054	11.2568	5.72735	4.78953	4.40959	2.05694
IGHV3-6	0	0	0	0	0.149078	0	0.0516099	0.237572	1.84153	0.243626	0.0448655	0	0	0	0.404425	0.169838	0	0	0	0.138929	0	0	0.0445979	0.0383445	0	0	0	0	0	0	0.216634	0.480208	0.133305	0.147885	0.0847048	0	0.0487532	0.0493564	0	0.038885	0	0	0	0	0.524686	0.0803663	0.2588	0	0.0765672
FLI1	0.555109	1.48744	1.24217	0.581208	6.2178	1.74967	1.95698	2.11844	4.06425	2.42845	3.62156	0.757079	1.64965	2.42506	2.97824	3.0235	2.16674	4.94592	1.82914	3.77844	2.25494	2.62941	2.12664	3.47944	1.53732	1.21649	1.00739	2.52958	0.99798	2.17668	7.94377	3.13859	3.24342	1.76245	8.10885	2.39532	1.70788	1.20297	0.940909	0.657153	0.913576	0.268945	2.19636	1.62977	3.86768	2.58157	4.23963	1.2675	0.460045
EVI2B	2.42092	2.24576	3.43562	1.72412	30.8021	9.50803	4.90932	12.2861	20.8436	6.97684	8.91122	1.74989	7.74435	2.73783	13.7394	14.961	10.6173	16.787	8.31991	11.9241	9.29725	17.9969	6.17674	16.9466	6.51794	3.0129	1.40182	13.7536	3.6026	9.83401	11.1742	9.4773	4.93378	9.69193	30.3359	2.2835	3.37204	3.3311	4.08707	1.82339	2.04706	0.688781	6.19175	3.04259	24.1641	8.18982	14.9442	5.47853	1.95548
IGHV1-18	2.76607	1.73714	6.29455	0.148519	252.468	17.7444	12.536	135.198	1145.24	52.2693	39.5663	0.491298	4.36726	2.59804	119.75	214.678	2.69009	57.1538	10.6607	27.4846	11.8046	9.53773	27.3651	87.1351	1.10117	8.3808	6.35566	1.69778	123.942	37.6955	22.8398	299.313	38.5851	169.009	42.6909	2.04423	1.03155	1.6709	13.3474	3.48846	0.756962	4.00299	4.69176	0.776275	3348.28	8.43415	230.861	4.64021	13.5436
LINC02154	0.0140073	0	0.255535	0.260727	0.00830605	0	0	0.211786	0.110111	0.0135739	0	0	0.0331735	0	0.025752	0.0189255	0.0191452	0.707053	0.0285725	0.0928869	0.115128	1.23434	0	0.0170913	0.340398	0	0	0.0135476	0.0609065	0.0342048	0.0344858	0	0.0148545	0.0549305	0.113266	0	0.0108654	0	0.0111226	0.00866609	0	0.0549963	0	0.0157242	0.0701603	0.00895539	0.0807483	0	0.00853206
IGHV4-4	0.0523007	0.0379551	1.90824	0	4.2178	0.0863688	1.07366	6.2866	4.03657	95.1813	6.1228	0	0.0825759	0.475242	10.9614	7.24308	0	8.36001	0.0800133	3.0636	2.63652	0.28805	0.185557	11.6144	0.188294	0.503213	0.199012	0	16.5362	0.766286	2.52377	3.07383	1.71938	1.59978	0.140971	0.0648361	0	0.533925	0.207648	0.0323576	0.082695	0.0684486	0.409218	0	93.8273	1.63845	2.06742	0.101385	0.668999
IGHV3-38	0.0511957	0	0.0504844	0	0.667877	0.0845441	0.042039	0.309625	3.43909	0.545727	0.694362	0	0.121247	0.1163	0.658852	2.21348	0.0349872	0.307646	0.0783229	0.198039	0.0280524	0	0.108982	0.093701	0.0460789	0	0.428576	0	0.286211	0.450058	0.73105	0.782311	0.217169	0.24092	0.241488	0.0317331	0	0.0402035	0.0406521	0.0633479	0	0.100504	0.109247	0	2.47883	0.098194	0.463775	0.0496215	0.0623681
TRBV29-1	0.0542522	0.118114	0.267492	0	6.94882	2.28458	0.445488	5.3728	2.98531	0.630881	0.348545	0.214747	1.02788	0.67784	3.29145	2.52888	0.852747	5.0206	0.553326	1.31913	0.475634	1.22839	1.57834	7.04995	0.537129	0.130497	0.206438	0.104943	0.168499	1.24531	1.7631	2.45516	0.230134	1.31907	7.75028	0.100883	0.462913	0.0852073	0.603108	0.20139	0.214451	0.0355013	0.771795	0.152254	2.08334	1.04056	1.34035	0.420672	0.198275
IL7R	0.26272	1.8204	2.48068	0.405282	28.6671	7.03378	2.33462	4.88368	14.5003	1.58683	5.54911	0.671916	1.15633	1.6392	7.72804	13.5543	4.15655	17.1456	2.80616	2.9275	1.85959	6.54542	4.91333	5.89747	1.99859	0.471793	0.618986	1.58376	1.06188	3.27626	6.66484	4.40588	1.54571	2.96944	27.2488	0.622378	2.14398	0.432406	2.97203	1.04649	0.92469	0.115397	2.43448	1.17565	6.63669	2.32853	6.47298	1.04996	2.10227
IGLV4-3	0	0	0.213463	0	0.545541	0.357477	0.133315	0.695503	2.2431	0.104886	0.309049	0	0	0.0614689	0.0994934	0.804309	0.036984	0.650408	0.0551953	0.0299059	0	0	0.384006	0.165081	0.0487087	0	0.24711	0.104683	0.571476	0.0792906	0.213179	0.159031	0.172172	0.212225	0.437607	0	0	0	0.0429722	0.0669633	0	0.141653	0.038494	0	0.225888	0.103798	0.311973	0	0
IGLV1-51	8.88732	4.98559	4.86581	0.355208	56.5151	15.8469	24.8035	78.9752	181.846	45.5449	54.2946	3.9567	1.59258	8.17475	297.611	192.309	3.24174	194.817	9.45357	28.6237	15.4159	16.8497	31.686	68.0246	7.26296	8.85262	11.7843	0.52734	7.99293	24.0987	44.271	70.274	279.334	1144.22	76.8983	5.10316	2.45302	2.22647	75.5489	3.06968	2.02592	2.85431	9.38541	0.612063	1251.52	24.4012	199.409	9.45959	12.122
IGHV1-12	0.106387	0	0.104909	0	1.13554	0.614904	0.611514	0	5.55001	2.165	0.911317	0	1.00783	0	4.30297	2.73108	0	2.04577	0.217012	0.940649	0.0582942	0.130208	0.07549	0.12981	0.0957542	0	0.566747	0	0.264338	0.363705	1.20485	1.4381	0.225644	3.17075	1.93561	0	0.0825237	0	0.0844771	0.19746	0	0.0696173	0.0756736	0	3.99657	1.02026	2.19033	0.103116	0.259208
FGL2	4.94435	3.57701	4.35326	1.02417	29.5223	4.64038	6.56496	8.84932	17.0305	6.17519	22.3788	1.21898	10.4369	33.6029	7.655	13.7895	9.23445	20.6321	10.3753	16.3966	10.2143	19.2912	4.03865	26.6642	7.48606	3.25028	1.21921	19.3857	2.19695	8.97655	18.4887	15.7298	3.46846	8.7835	26.4643	3.62625	2.48143	2.4237	3.17825	2.37499	1.5417	0.411969	6.33484	1.89609	19.2534	7.06831	19.4192	2.87737	1.50272
IGKV1-13	0.251405	0	0.030989	0	0.186348	0.051896	0.10322	0	0.179662	0.548157	0.089731	0	0.0992338	0	0.982175	0.509515	0	0.226612	0	0.0694644	0.0344389	0.115386	0.0445979	0.115033	0	0	0.0956633	0	0.780826	0.153478	0.185687	0.332452	0	0.0985899	0.465876	0	0	0	0.0998144	0	0.0496885	0	0.223531	0	1.31171	0.602747	0.879921	0.0609186	0
AC142381.1	0	0.0458761	0.155843	0	0.824683	0.0521968	0.415273	1.24254	8.08647	0.796373	1.30864	0	0.0998091	0	1.91763	2.56234	0	0.683777	0.225661	0.384269	0.103916	0.038685	0.0448564	0.0771336	0	0	0.0962179	0	0.0392676	0.154368	0.77818	1.44898	0.73743	0.991614	0.511175	0	0.0490358	0	0	0.0782209	0	0.0413668	0.134896	0	2.37477	0.282913	0.624721	0.0612717	0.0385055
SLAMF6	0.397112	0.64554	0.509073	0.214359	14.1193	2.41985	0.554346	1.94536	7.65093	1.54699	0.73703	0.162428	0.595638	0.433014	4.32936	5.16691	2.00826	5.93719	1.74969	1.84775	1.27946	5.43379	1.73578	6.677	0.957891	0.429843	0.187373	0.368716	0.705488	2.34284	2.36599	1.75044	0.825415	2.21759	8.89484	0.177225	0.825538	0.268189	0.889224	0.181808	0.640449	0.140325	1.18636	0.254097	8.49995	1.48779	3.90479	0.646633	0.740173
AL096816.1	0	0.0379421	0.0147304	0.00695123	0.761779	0.209681	0.0551978	0.191978	0.352278	0.094092	0.0266581	0.0147822	0.0412738	0.0254507	0.274629	0.333017	0.122503	0.592451	0.0609416	0.0742936	0.0327406	0.246815	0.084797	0.56503	0.0537798	0.0269486	0.0056841	0.0144477	0.0231975	0.0875455	0.23905	0.122911	0.00792071	0.070296	0.910968	0.0277774	0.0405553	0.0234612	0.0830306	0.00924185	0.0531428	0.00488751	0.180632	0.0335377	0.386578	0.0668526	0.116868	0.0217179	0.0272967
VCAM1	1.78109	0.826817	8.51686	0.161065	14.7412	5.74264	2.5846	5.28233	9.46631	3.11655	4.85915	1.20594	1.13851	8.25596	5.10395	37.741	3.58261	8.03807	6.36716	5.49506	4.18034	19.0123	2.80651	8.94149	1.12929	3.88095	2.68349	2.22478	3.2183	6.82505	12.3952	10.2051	5.17705	6.63684	16.2026	3.5444	2.8163	5.22379	3.10627	0.687035	1.01473	1.05226	4.91371	3.69322	22.7063	5.98635	52.2284	1.23009	4.47572
PTGDS	4.49394	4.24634	2.12531	1.23766	22.2267	12.5253	1.12211	15.0038	18.5284	6.56788	8.00021	0.629249	0.883298	0.427103	11.7944	29.374	2.03073	71.9327	1.361	11.1347	0.226141	3.36184	5.55763	13.2776	10.9705	4.23562	2.21952	1.29507	0.33612	9.14191	16.5554	5.09373	1.43945	3.35202	101.718	1.2677	5.42096	0.770628	2.25029	0.226965	5.61921	0.798198	3.11827	1.08102	21.0853	4.12795	2.02417	2.99569	1.34073
MS4A6E	0	0.0299475	0	0.019203	0	0.0170368	0	0.0155984	0.368629	0.0399896	0.103101	0.0408364	0.0162886	0.0703084	0.113801	0.013939	0.0987056	0	0.0105221	0.0342064	0	0.0378798	0	0.0377641	0	0	0	0	0.0256336	0	0	0.0121266	0.0218813	0	0.139038	0.0255787	0	0	0.0163839	0	0.0163121	0	0	0.0115811	0.137798	0.0263833	0	0.0199988	0
TRBV11-2	0.0534543	0.0775847	0.105423	0	1.93354	0.926877	0.131681	0.444516	1.146	0.155401	0.0381577	0.0705295	0.126596	0.0607157	0	2.05835	0.547961	1.6061	0.381632	0.0886182	0.41006	0.686943	1.17583	1.46752	0.144335	0.128578	0.0406803	0.0517	0.132817	0.469913	0.68434	0.848241	0.170062	0.293474	2.8456	0.0662662	0.456105	0.0419771	0.297119	0	0.0422596	0	0.0760445	0.120012	2.00808	0.649332	0.30815	0.259053	0.130239
CLEC4C	0.028123	0.0306137	0	0	0.817142	0.162547	0.046186	0.0106303	0.472293	0.0272528	0.0401504	0	0.0111006	0.111801	0.336071	0.598458	0.0960963	0.980184	0.0717076	0.163181	0.0231147	0.0602348	0.239465	0.223046	0	0	0	0	0.0174692	0.0618068	0.124629	0.190078	0.029824	0.1544	1.19389	0	0.0109074	0	0.0223312	0.00869961	0.0111166	0	0.0900179	0	0.892135	0	0.277923	0.0272582	0
GPR183	4.87504	3.50062	3.25758	1.09846	31.5478	6.11209	4.54037	4.82987	26.2939	4.00313	27.9039	10.1139	1.96477	7.94161	18.3026	10.6948	7.89941	19.6432	3.65713	6.657	4.99101	6.5868	18.8892	6.53537	7.28605	1.06463	1.22041	10.8446	2.0321	8.50857	13.2278	6.78593	5.59165	3.67262	63.3496	2.38558	3.18445	1.00745	24.031	0.801649	1.65319	0.789132	15.1481	2.59227	8.74987	6.6601	7.6069	2.54908	14.1284
IGHGP	8.03503	3.3858	3.93431	0.0344611	24.6025	19.72	2.9341	77.9728	98.8856	19.7889	17.1278	0.280921	4.31157	0.799096	157.967	96.0678	2.70762	71.1359	4.43741	20.2778	5.37662	5.10967	3.94112	14.9546	0.599886	2.02625	0.0845378	2.86501	12.7883	11.5827	4.26638	48.8015	5.75267	67.0129	62.6651	1.21642	0.545721	1.27941	2.70499	1.27142	4.31779	11.0247	0.566267	7.8872	642.949	7.84769	7.79112	15.0914	4.34168
CCL23	0.206864	0.257354	0.0291414	0.0275035	0.788568	0.0732028	0.0970658	0.201067	0.3379	0.143188	0.506287	0	0.0699881	0.100699	0.135826	0.978239	0.0605876	3.55169	0.120562	0.408268	0.0809641	0.271267	0.230664	0.288467	0.186189	0	0.0899598	0.200075	0.183568	0.25979	1.80436	0.225789	0.0626788	0.46356	2.34981	0.109905	0.0687698	0.0696206	0.187727	0.0182833	0.537349	0.0193381	0.168163	0.0165871	0.493404	0.113362	0.24337	0.143216	0.216007
TRAV8-6	0.0388759	0.0846378	0.191679	0.0361811	3.52705	0.738292	0.127691	0.470232	1.80583	0.150692	0.194257	0.0769413	0.24552	0	0.964873	2.49497	1.16898	2.47631	1.24898	0.665979	0.937279	1.14193	0.634466	2.32432	0.244933	0.140267	0.177514	0.0752	0.16904	0.588579	0.823122	0.959627	0.164909	1.06718	2.75064	0.120484	0.392024	0.183173	0.216087	0.0240519	0.0307342	0.0254395	0.580703	0.0654613	2.5314	0.546806	1.08853	0.075361	0.118399
TRAV27	0	0	0.0506032	0	0.639019	0.423715	0.0842759	0.310353	0.806787	0.0497283	0.0366314	0	0.0405107	0.174861	0.141515	0.728007	0.350695	0.740088	0.28786	0.623872	0.196829	0.533853	0.0728257	1.22098	0.0461873	0	0.0390531	0.198528	0	0.12531	0.429555	0.452395	0	0.603718	1.65982	0	0.0796111	0.0402981	0.203739	0.0317485	0	0	0.182507	0.0576059	0.599747	0.229658	0.507127	0.0497382	0.0312574
TRAV24	0	0	0	0.0591766	1.54587	0.315007	0.0522118	0.576823	0.954224	0.123233	0.181555	0	0.0501955	0.0722215	0.175346	0.558412	0.173814	1.06986	0.226976	0.702745	0.278724	0.350195	0.180472	0.853417	0.114458	0	0	0.0614974	0.0394966	0.217375	0.281778	0.635288	0.13486	0.698178	1.32824	0	0	0.099864	0.0504892	0.0393385	0.100536	0	0.0452276	0.0713776	0.902367	0.0406518	0.837819	0.061629	0.0774601
TRBV30	0.0975811	0.0708155	0.288676	0.0908169	1.273	0.402861	0.20032	0.368848	1.32496	0.330966	0.139314	0.0965639	0.0770339	0	0.493349	0.692177	0.200061	2.46282	0.149286	0.161773	0.668362	0.865869	0.692414	2.44084	0.219571	0.17604	0	0.0471893	0.181843	0.238286	1.22524	0.745558	0.517416	1.56895	3.05762	0.090727	0.52985	0.191574	0.348681	0.0301859	0.192862	0	0.485868	0.0273854	1.50703	0.155968	0.562529	0.236451	0.148595
GPR15	0	0	0.0772992	0.0324243	0.423509	0.489032	0.014304	0.105352	0.311215	0.253209	0.26113	0.0344761	0.0137517	0.0593578	0.128102	0.329503	0.178569	3.18222	0.0621828	0.0577575	0.0477249	0.1599	0.197769	0.361333	0	0.0419009	0.0530274	0	0.0108205	0.119105	0.248744	1.06474	0.184732	0.0409873	0.176074	0.0323921	0.108098	0	0.0829927	0	0.027543	0.011399	0.0867345	0.00977736	1.7305	0.133644	0.186493	0	0.0318317
AL590233.1	0	0.0694179	0	0	0.0567216	0.039491	0	0	0.102537	0	0.0682822	0	0	0.108649	0.307753	0.161551	0.0326854	0.114963	0	0.02643	0	0.234146	0.0678748	0.116715	0	0	0	0	0	0.0700748	0.0235502	0.0281094	0.0507203	0	0.386744	0.0592909	0.0370995	0	0	0	0.0378112	0.0312972	0.10206	0	0.279487	0	0.0787752	0	0.0291325
TRAV23DV6	0.0533237	0	0.0262914	0	2.18177	0.528349	0	0.483741	0.876455	0.103347	0.228386	0	0.294669	0.0605672	0.63722	0.756487	0.145766	0.961301	0.571048	0.559876	0.467494	1.07684	0.491885	1.4314	0	0.064132	0	0	0.198738	0.31251	0.393846	0.532772	0.282744	0.376401	1.97627	0.0330521	0.124088	0.167498	0	0.0659809	0.0843125	0	0.113788	0.0598595	0.890298	0.204551	0.483052	0	0.0649605
APBB1IP	2.62962	1.44715	1.49102	1.32564	11.0094	3.58258	1.45302	5.47927	8.08058	2.68628	4.50508	0.549354	5.6655	3.75842	5.01072	6.51367	3.21603	6.49196	5.27457	4.68338	4.45773	6.21219	2.89606	14.7828	3.36775	1.50883	1.21324	7.20606	1.91248	4.38255	4.3781	3.95709	2.07988	4.59752	14.364	1.86085	1.8018	1.90583	2.79712	1.36931	2.13088	2.77831	2.33807	2.18934	7.34026	3.84227	6.37942	2.63903	0.650706
CH25H	1.00897	0.844872	0.223227	0.613984	3.29066	0.181574	0.361147	0.801884	2.18162	0.325918	21.792	0.17921	0.837366	1.2195	2.9846	1.68657	1.06966	5.25473	0.435375	3.08093	0.240991	0.90242	1.24832	0.694477	1.31563	0.451168	0.442996	0.650574	0.0803519	0.663342	5.07644	2.08309	1.33064	0.152183	12.796	1.04234	0.301021	0.314903	1.59209	0.832315	0.265889	0.0931121	1.78502	1.56102	3.98472	1.28188	1.48075	1.44185	0.20486
TRAV13-2	0.0531936	0.386031	0.498318	0.0495063	2.17645	0.439217	0.218398	0.442348	1.48254	0.463928	0.265801	0.175464	0.167971	0	0.342282	0.862447	0.43623	1.4704	0.488276	0.646696	0.612089	1.66015	0.45294	1.55772	0.0478771	0.255902	0	0.102896	0.0660846	0.285768	0.811964	1.06295	0.112822	0.166881	2.0073	0	0.495142	0.125317	0.126716	0.13164	0.210267	0	0.264857	0.0597135	0.799314	0.238061	0.876134	0.721811	0
SIGLEC22P	0	0.0638196	0.130079	0.0272817	0.191207	0.121021	0.120354	0.177285	0.146639	0.113626	0.167401	0	0.323977	0.099887	0.0808384	0.138621	0.120198	0.105691	0.11959	0.356378	0.240934	0.179386	0.124802	0.536514	0	0.141021	0.0223086	0.623736	0.0546263	0.114531	0.129906	0.223968	0.09326	0	0.612345	0.0545093	0.0909536	0.0920789	0	0.126951	0.0231746	0	0.0625527	0.115173	0.244712	0.187413	0.265549	0.0284123	0.0714216
FPR1	2.44662	2.92261	0.936862	0.759007	2.75701	1.0552	2.05735	4.30938	3.94148	1.64579	33.3753	0.410452	2.98013	5.91128	3.04506	3.79413	2.16616	5.81017	1.03758	2.4671	2.09153	5.32515	1.58692	9.31491	1.73291	1.65833	0.415899	8.7741	0.919172	1.50285	3.65552	2.52997	1.50683	2.74978	8.96281	1.07875	0.456521	1.13562	1.68905	1.5553	2.12034	0.143045	1.77617	1.14201	2.30916	4.02611	4.7706	0.863804	1.33151
FOLR2	11.2127	1.54249	4.81463	1.26143	13.033	6.51133	15.4171	7.90609	13.2082	1.79106	11.2035	0.751916	3.11269	7.69751	3.22805	5.67072	4.59978	24.9527	3.24387	15.9077	2.80191	2.28094	6.75412	7.17898	1.94078	1.09292	0.656401	1.05766	1.21505	2.36948	8.91114	10.2289	2.84206	3.50321	47.1298	2.25305	2.46114	2.27388	3.73018	0.905258	3.8843	0.977641	8.74254	3.14676	9.05186	2.97384	2.71441	3.64255	1.90447
KRT2	0.0778289	0.00627568	0.0895388	0.00804821	0.0564067	0.0499823	0.00710096	0.00653747	0.0741586	0.0167601	0	0	0.00682675	0.0491118	0.0317969	0.0233679	0.0236392	0.103931	0.0132298	0	0.0142153	0.00529196	0.0981789	0.189929	0	0.0208009	0	0	0	0.0464572	0.0212904	0.0457418	0.0275121	0.0542596	0.128199	0	0.0201237	0.0339546	0.0755336	0.00535016	0.0068366	0	0	0	0.0577529	0.00552877	0.235014	0.125726	0.0316045
CD27	1.17554	1.02148	0.846527	0.806145	13.0793	4.95536	0.774771	4.09264	16.4589	3.88216	1.99849	0.326537	1.08675	0.597339	8.61634	12.2675	1.26847	11.8974	2.22437	3.29936	1.71203	3.49276	4.12679	14.6078	1.89335	0.632496	0.411997	0.73304	1.22022	4.31343	3.52631	4.89988	1.39427	5.43489	15.551	0.306799	2.23165	0.777381	1.63352	0.507188	1.56522	0.334015	1.06721	0.520905	13.2611	2.31404	4.78953	1.78405	0.810255
TRAT1	0.0862713	0.118955	0.0850726	0.0160582	4.40974	0.520007	0.12043	0.782635	2.23181	0.409649	0.277126	0.0910634	0.258801	0.41156	1.31644	1.33464	0.613161	1.76264	0.585129	0.614999	0.207996	2.08536	0.581554	2.42637	0.496952	0.0830063	0.0328275	0.116816	0.208998	0.610937	0.875082	0.517177	0.201276	0.703701	3.37759	0.0588218	0.254296	0.0270992	0.226063	0.0426997	0.163689	0.0395177	0.441828	0.0920032	1.54842	0.391611	1.49199	0.384645	0.126118
CD3G	0.153507	0.42085	0.465336	0.0529134	7.63949	1.87778	0.364148	1.70205	4.20114	0.556462	0.280035	0.0975204	0.507176	0.54891	2.55564	3.53358	1.52309	3.49851	1.7483	1.26302	0.96886	4.64129	1.08925	5.48039	0.491252	0.341892	0.151438	0.148469	0.384948	1.20508	1.62651	1.29649	0.62102	1.27532	4.96517	0.144487	0.613012	0.209842	0.39728	0.15477	0.256201	0.208344	0.529774	0.268057	4.6798	1.33765	2.50963	0.468403	0.498685
TRAV1-2	0.108504	0.0787426	0.320991	0.151475	1.93023	0.537549	0.133647	0.369123	1.74466	0.105147	0.0774544	0.0715822	0.0428285	0.246487	0.698186	0.733009	0.444912	2.15169	0.96832	0.479684	0.445907	1.19519	0.192481	4.0711	0.0976598	0.0652487	0	0	0.0336998	0.344447	0.213709	0.542049	0.460268	0.255304	1.16985	0	0	0.127811	0.215396	0	0	0	0.154359	0.0304509	2.08334	0.485596	0.491463	0.105168	0.198275
PENK	0.631241	0.37564	0.00622471	0.0176245	1.29887	0.00521213	0.0362838	0.00477207	0.0405994	0.0244683	1.39236	0.0624661	0.0896982	0.0358495	0	0.0170576	0.0258834	0.318634	0.0160953	0.0662777	0.0518827	0.0193145	0.15677	0.17715	0.170445	0.0151838	0.00480393	0.103789	0.0352897	0.0184973	0.351228	0.0296796	0.0535536	0	0.57424	0.633854	0.0489649	0.0396565	0.120297	0.0117161	0.0548946	0.00413069	0.570235	0.0212583	0.0632356	0.0121073	0.0467863	0.128484	0
TNFSF8	0.270178	0.452052	0.603155	0.586716	2.91493	1.11542	1.03532	1.23117	2.0005	0.676363	1.76255	0.178241	0.728733	1.49178	0.896844	1.28272	1.55918	1.65964	0.90322	1.39349	1.93689	1.04713	0.676319	1.51095	0.830847	0.207601	0.291286	1.79288	0.358962	0.560791	1.1271	1.36295	0.70834	1.39503	3.11525	0.279112	0.41915	0.565781	0.375438	0.473605	0.207662	0.0933101	0.982246	0.353842	2.18028	1.24753	1.81091	0.218225	0.338282
TRAV17	0.135182	0.0981029	0.199956	0	4.14161	0.446477	0.0740026	0.340651	2.51174	0.218332	0.128664	0.0594546	0.355724	0.0511818	0.704163	1.1872	0.554301	1.40805	0.505539	0.199208	0.641959	2.37145	0.319741	1.7869	0.446128	0.0541942	0.0342925	0.0871637	0.223923	0.550174	0.510319	0.715046	0.286717	0.600808	2.15586	0.0279304	0.209719	0.212314	0.250464	0.0278783	0	0	0.288466	0.126459	1.80561	1.55568	0.964833	0.1747	0.19213
IGHV3-79	0	0	0	0	0	0	0.210072	0	0.182823	0.247912	0.228275	0	0	0	0.411541	0.172827	0	35.5892	0.0652308	0.21206	0.0700898	0	0	0	0	0	0.0486733	0	0	0.0312357	0.251939	0.375891	0.0678254	0	0.301683	0.0396432	0	0	0.253927	0	0	0	0.0454929	0	0.213567	0	0.263354	0	0.0389572
AL591686.1	0.113887	0.123973	0	0	0.0675328	0	0	0	0.0406936	0.0551815	0.284539	0	0.0449532	0	0.0261722	0	0	0.0342186	0	0.141604	0.0156009	0.0174234	0	0.191072	0.102504	0	0	0.0275373	0	0	0.140194	0.0167335	0	0	0.422086	0.211775	0.0220853	0	0	0	0.022509	0	0	0	0.308989	0.109218	0	0	0
LINC01215	0.0336564	0.030531	0.0165944	0.00783086	0.793314	0.868436	0.0690919	0.0445265	0.595285	0.285381	0.120126	0.0666112	0.0332119	0.0477855	0.456338	0.773053	0.178257	1.04158	0.0600717	0.0557966	0.0553255	0.185365	0.453756	0.80593	0.0757315	0.0101196	0	0.0162759	0.0156798	0.234232	0.248585	0.187916	0.0446151	0.0989893	2.6535	0.0052154	0.0717944	0	0.1069	0.015617	0	0.00550599	0.215459	0.0141681	0.639197	0.0484151	0.353394	0.154952	0.0512516
SELE	0.0523235	0.535055	0.351794	0.0177078	4.69914	0.223871	0.359344	0.316445	2.37949	1.02331	17.1336	0.30753	0.292897	0.475449	2.68034	8.98148	1.60585	6.04836	1.6325	4.95489	0.310161	0.963496	2.09602	0.232158	4.49961	0.743707	0.372857	0.220827	0.871639	3.45211	7.49496	1.52361	2.70883	1.08564	15.8277	1.35036	1.67144	0.418361	1.86587	0.206002	0.112815	0.389082	5.68418	1.03857	1.9378	2.56367	4.3286	0.958966	9.17885
PIK3CG	0.242735	0.210852	0.475098	0.164298	4.70194	0.923171	1.1023	1.2178	3.36156	0.883872	0.918873	0.169842	1.01038	4.42387	0.62206	1.21495	1.03553	1.6885	0.954641	2.02223	1.30184	1.97832	0.579351	2.79798	0.215164	0.362708	0.195924	2.44017	0.450055	0.709493	1.54111	2.01887	0.612339	0.819211	1.95785	0.563073	0.165465	0.381235	0.268674	0.336759	0.0668742	0.0481333	0.46827	0.522266	2.87068	1.32381	1.66281	0.1212	0.212819
TRAV38-1	0	0	0.121849	0	0.659449	0.306083	0.101465	0.0934137	0.529824	0	0.132309	0	0.195094	0	0.454344	0.79302	0.084445	0.519774	0.09452	0.0682837	0.541657	0.415891	0.13152	0.67847	0.055608	0	0	0	0.0767554	0.211217	0.486748	0.254179	0.0655198	0.145371	1.08245	0.0382955	0.143774	0	0.147177	0	0.0976878	0	0	0.0346778	0.412614	0.0790003	0.152641	0.0598831	0.0376329
LINC00426	0.049417	0.123526	0.0676811	0.0459915	1.19167	0.335495	0.0450872	0.278113	0.745537	0.228798	0.0823099	0.0543354	0.151711	0.0997864	0.434069	0.823472	0.206382	0.521326	0.168004	0.257912	0.162466	0.487214	0.307795	1.11549	0.07413	0.0528298	0.0208932	0.0690375	0.102321	0.286933	0.221699	0.242029	0.0698746	0.327293	1.48369	0.108909	0.0979606	0.0086237	0.0915594	0.1155	0.0998398	0.0395234	0.132791	0.0215732	0.880077	0.140418	0.316529	0.154336	0.0802684
TRAV3	0.0420219	0.0304957	0.455819	0	1.49509	0.693946	0.138024	0.349446	2.13214	0.122165	0.149984	0.0831677	0.232215	0.190921	0.502164	2.413	0.459485	2.07065	0.235723	0.208995	0.253282	0.56574	0.298178	1.56385	0.037822	0.202158	0.0319799	0.0812856	0.104411	0.595163	0.765585	0.815009	0.222818	0.889874	2.32196	0	0.228173	0.131997	0.166838	0.0779948	0.166107	0.0274981	0.239123	0.094345	2.42053	0.214929	0.761342	0.122189	0.563116
LAX1	0.109115	0.0989823	0.181573	0.0380818	4.55348	0.878434	0.229598	0.964091	4.95154	0.997909	0.418661	0.0269944	0.177662	0.240129	1.67379	2.58919	0.456737	1.68022	0.559918	1.17581	0.545574	1.13515	0.503267	2.21759	0.0613809	0.20505	0.1557	0.310006	1.02939	0.639482	0.993967	1.85174	0.614734	1.43882	2.45398	0.342396	0.142829	0.0696206	0.254514	0.0886038	0.0646976	0.111566	0.184333	0.0880391	8.56245	0.414208	2.41498	0.0793199	0.299086
LOR	0.0709248	0.0900739	0.00874242	0	0.0630855	0.0146406	0	0	0.0126713	0.0343651	0.0126572	0	0.0139976	0.0201398	0.0977947	0.0598922	0	0	0.0271265	0.0391937	0	0.0108507	0.0503267	0.0649051	0	0.0213252	0	0	0	0.00865965	0.0261924	0.010421	0	0	0.191171	0	0	0	0	0	0.0420534	0.452512	0	0	0.0444063	0.0113362	0.0146022	0	0
TRAV39	0.131779	0.14345	0	0	0.937705	0.326427	0	0.348679	0.894645	0.0638505	0.0470342	0	0.0520153	0	0.363406	0.623168	0.315202	0.791887	0.268806	0.364111	0.144415	1.00803	0.233768	0.763762	0	0.0792447	0.100288	0	0.0409285	0.321794	0.25955	0.387247	0.279498	0.258389	1.50959	0.0816817	0.15333	0.103484	0.313918	0.0407647	0.156271	0	0.468673	0.147931	1.1001	0.0842511	0.434096	0.127727	0.120402
AC005392.2	0	0	0.0357249	0.134868	0.0859304	0	0	0.328655	0.258898	0.0702143	0.362054	0.0478007	0.114399	0	0.133209	0.244742	0.14855	0.261244	0.110849	0.720722	0.277914	0.354719	0.15424	0.132613	0	0	0	0.350392	0	0.10616	0.0713547	0.425843	0.0768388	0.34097	0.439424	0.0449114	0.0562039	0.0568992	0.172603	0	0.0572821	0	0.0515385	0.0406686	0.060487	0.0926482	0.0596702	0	0
FCRL6	0.277618	0.397015	0.152984	0.0607939	3.8783	0.128098	0.107277	0.290121	1.12035	0.300678	0.0466292	0.43094	0.0773511	0.0927442	0.510393	1.08115	0.133923	1.42294	0.345606	0.383537	0.241601	0.734522	0.469304	4.02006	0.396855	0.0883826	0.037284	0.08687	0.136944	0.610131	0.924725	0.403108	0.242455	0.691643	1.05091	0.192324	0.196345	0.0512967	0.188026	0.399085	0.174291	0.0587746	0.156815	0.132908	0.736171	0.30278	0.578294	0.150369	0.0547093
WIPF1	2.21657	1.99554	4.29608	1.56888	22.9981	4.14018	3.44389	7.88855	17.2637	4.24034	7.8055	1.41656	5.67232	5.3368	8.8865	10.1799	6.96286	11.3801	6.54434	10.2749	9.27358	13.4736	5.13756	15.0284	3.20883	4.34818	3.55026	8.73254	3.0493	7.7179	12.2436	10.4134	6.4281	6.25439	19.8829	3.86238	4.75007	4.98534	7.88519	3.43652	1.96786	0.726016	6.08209	3.85718	13.4299	7.35472	12.5062	4.14849	3.46347
PRDM8	0.0760571	0.182835	0.232033	0.0530887	0.842813	0.153075	0.136618	0.247959	0.754145	0.119768	0.563283	0.0470402	0.266437	0.161979	0.419486	0.889532	0.272882	0.668427	0.128478	0.493851	0.299539	0.334531	0.320438	1.21803	0.11124	0.131493	0.083205	0.252866	0.188978	0.285553	0.58282	0.662126	0.196602	0.23861	1.97637	0.126697	0.180678	0.201578	0.237799	0.220572	0.146564	0.0186637	0.213017	0.189435	0.416672	0.306953	0.876897	0.216548	0.0810731
IGHV3-22	0	0.0881742	0	0	0.180119	0.100323	0.0997695	0	11.5047	0	0.52039	0	0	0	0.167531	0.369363	0	0	0.0309801	0.134285	0.0332878	0.0371764	0.0862142	0.185314	0.0546786	0	0	0	0	0.0296696	0.17948	0.714087	0.12885	0.142942	0.36843	0	0	0	0.048239	0	0	0	0.0432119	0	1.7243	0.0776799	0.350209	0.0588823	0.111012
TRAJ1	0	0	0	0	1.46012	0.87135	0	0.265928	0.754145	0	0	0	0	0	0.646707	0.71291	0.240396	0	0.896923	0.194388	0	0	0.748812	1.71684	0	0	0	0	0	0.171796	0.692831	0.826959	0.37304	0	1.65926	0	0	0.82871	0	0	0	0	0	0	0	1.34938	0	0	0
CLEC10A	0.158999	0.711554	0.287448	0.0493258	4.83464	0.9117	1.10252	1.00167	4.70284	0.676236	2.2826	0.291373	0.536944	0.461527	1.66457	8.56917	0.718364	11.2957	0.180184	3.58292	0.130684	0.82705	3.76701	4.3274	1.97966	0.0424949	0.0873911	0.0939772	0.104252	2.93355	4.68004	4.24667	0.299762	0.60274	24.7081	0.246385	0.301484	0.298277	1.05211	0.038255	0.474868	0.0635832	1.02415	0.580084	3.3847	0.722873	0.22551	2.14042	0.0753268
IGKV3D-15	3.57982	0.159871	0.407317	0	1.04505	0.136424	0.407014	0.541257	7.32053	1.49436	1.9657	0	0.0434774	0.625555	9.3152	5.58086	0.0752754	9.00192	0.393197	1.12608	0.12071	0.370731	20.0868	1.0752	0.0991394	0	0.54487	0	0.0342104	1.39867	2.41353	2.49236	0.525647	0.993493	0.742237	0.136549	0.0427206	0.0864984	0.787173	0.340735	0.130621	0.46851	0.901012	0.0309123	4.78153	0.281688	1.31531	0.213523	0.67093
TRAV12-1	0	0.186203	0.442778	0	3.76565	0.741502	0.158017	0.290956	3.80473	0.372962	0	0.0423177	0.6583	0.364294	1.12033	1.30001	0.832901	3.31498	0.588804	0.638051	0.527219	1.80568	1.18342	1.48709	0.173202	0	0.146449	0.49632	0.15938	1.03381	1.64242	0.753992	0.340125	1.15713	3.58762	0.0397598	0.199028	0.100745	0.254674	0.119057	0.0507115	0.125925	0.41064	0.180018	3.26648	0.328083	1.05651	0.0621728	0.117215
IGLV2-8	0.66977	4.73907	6.46016	0	16.507	3.83662	10.2777	5.85449	24.4405	32.8173	38.368	0.414242	2.37933	2.51999	50.0621	49.319	1.45899	18.5644	2.30549	10.1089	19.5655	4.20114	5.91097	8.68308	1.73313	1.1076	2.77157	0.161947	98.3417	10.5696	21.7251	18.1812	2.53037	42.2545	14.2732	0.90814	1.13648	1.34778	8.44285	1.78699	1.059	2.46533	1.42923	0.0234957	1312.55	2.06075	12.8587	0.243441	5.32906
MAP1LC3C	0	0.227634	0.00909745	0.0515167	0.623649	0.548464	0.303022	0.111591	1.16035	0.232444	1.23809	0.219107	0.014566	0.628731	0.220493	0.635708	0.113486	1.24183	0.0188187	0.499621	0.151654	0.0903304	0.183296	0.439016	0.199285	0.0443824	0.154461	0.0892285	0.0916909	0.360453	1.09024	0.41208	0.254374	0.0723576	1.39254	0.53753	0.17175	0.0869374	1.12815	0.0456619	0.0729353	0.676147	0.157493	0.165702	1.46331	0.129762	0.303904	0.0894194	0.21354
PI16	0.0935222	20.4424	0.0138334	0	12.2282	0.169886	4.40804	2.42505	5.34671	0.670649	24.5208	0.715699	0.494658	0.924169	7.63403	1.52263	1.03539	17.9614	0.0238462	4.8322	0.245976	0.194586	7.83727	5.34618	4.51178	0.0787349	0.298927	0.714578	0.0871398	2.89122	9.31593	5.65591	0.218193	0.110026	63.0768	8.37069	0.203124	0.36721	9.75055	0.00578606	1.64138	1.37697	2.26177	2.16794	14.1156	4.16154	1.20919	3.81622	0.239256
FCGR3B	0.141942	0.0154513	0.0419909	0.178339	0.223047	0.175801	0.250593	0.10194	0.319524	0.0343874	7.57899	0.00936415	0.117656	0.322447	0.123954	0.311642	0.179456	0.255888	0.271441	0.231394	0.346104	0.108577	0.34748	0.956891	0	0.0256069	0.0324066	0.0960985	0.17634	0.0242628	0.143278	0.191872	0.0526845	0.016699	0.32042	0.0131972	0.0220206	0	0.0563547	0.0351269	0.112215	0.027865	0.0353373	0.119505	0.663566	0.104361	0.368216	0.00687886	0.0432295
FCER2	0.0444908	0.0387448	0.0131618	0	0.448496	2.62294	0.00730666	0.0605417	0.438764	0.301799	0.165148	0.0352216	0.00702451	0.0303207	0.179949	1.86949	0.006081	1.15497	0.00453768	0.113096	0.0438812	0.021781	0.669277	1.24315	0	0	0.0203153	0	0.00552727	0.143409	0.170876	0.130741	0.028309	0.00697893	6.25986	0.0110309	0	0.00698763	0.0635905	0.00550514	0.00703464	0.0116455	0.272159	0	1.15138	0.0910228	0.285789	0.267361	0
IGHV1OR16-3	0	0	0	0	0.126171	0	0	0.241281	1.90069	0	0.151886	0	0	0.241678	1.46692	0.574965	0	0.127861	0.162759	0	0	0	0	0	0	0	0.0809638	0	0	0.0519579	0.261924	0.437683	0	0.417204	0.286757	0	0	0	0	0	0	0	0	0	0.532876	0	0.350453	0	0
PLA2G2D	0.162696	2.84548	0.0200544	0.0151418	6.97517	0.544066	0.180356	0.701073	9.22001	1.56085	0.325187	0.118067	0.173391	0.00923983	8.2106	5.77029	0.400271	2.15089	1.06614	0.337152	0.365507	4.77401	1.9568	8.54612	1.88169	0.352212	0.0495265	0.0393391	0.161699	2.7572	1.19365	0.836676	0.163909	4.33216	10.7111	0.0302536	0.151442	0.0319408	2.07994	0.0100657	0.0836049	0.0425857	0.711715	0.0319615	9.07274	0.228839	3.35633	0.370579	0.0594602
PYHIN1	0.420014	0.163777	0.203998	0.0350059	4.63549	0.605612	0.159577	0.50235	1.95325	0.564964	0.125298	0.0909849	0.163312	0.192252	1.38301	1.59235	0.676895	1.95889	0.604205	0.56467	0.381283	1.57286	0.751754	2.52037	0.321612	0.0753952	0.0477079	0.0848837	0.128503	0.83276	0.885903	0.571075	0.425474	0.880097	2.76268	0.139885	0.316076	0.0935346	0.233957	0.0736904	0.17346	0.0246132	0.352266	0.0774095	2.19275	0.517022	1.33712	0.261272	0.236744
CCR2	0.222008	0.275589	0.308221	0.0543734	6.08345	0.815252	0.676431	1.30292	6.1875	1.02474	1.6807	0.104066	0.470437	2.14341	2.53486	4.81117	1.10596	5.26617	0.723978	3.25112	1.36054	2.3954	1.00738	3.26134	0.736176	0.351326	0.115601	0.435094	0.566136	2.05152	2.15468	3.31005	0.551416	1.87412	8.10205	0.0977751	0.489439	0.279863	0.463911	0.148196	0.281745	0.0573461	0.444656	0.57714	8.11079	1.56505	2.55001	0.532291	0.434154
KCNA3	0.0594261	0.0554478	0.0879007	0.0316039	3.14126	0.420581	0.174276	0.436415	2.39639	0.271483	0.490866	0.0504057	0.167546	0.626773	0.624303	0.837325	0.394515	1.27537	0.203475	0.59111	0.316318	0.597441	0.355411	1.13426	0.0611276	0.132733	0.0258429	0.114952	0.253123	0.269498	0.593585	0.957972	0.243079	0.565961	1.51597	1.9996	0.0987779	0.0733334	0.114598	0.0630273	0.0134231	0.0444423	0.175118	0.10483	3.20334	0.238815	0.999761	0.0575988	0.124105
IGHV3OR16-6	0.0605816	0	0.17922	0	0.467008	0.150066	0.198985	0.0915973	2.46773	0.645777	0.302718	0	0	0	1.61497	0.532042	0	0.291239	0	0.435214	0	0	0.0859748	0.258719	0	0	0.322731	0	0.075263	0.0295871	0.268472	0.605288	0.321229	0.332604	0.081646	0.0751017	0	0.0475741	0.144315	0	0	0	0.129276	0	2.42755	0	0.349237	0.0587188	0.184506
ROS1	0.00555228	0	0.00273757	0	0.0115234	0.00229225	0.0159573	0.0209872	0.188472	0.00538048	0	0.0421238	0.00219158	0.025226	0.306231	0.0300071	0.00569165	0	0.175548	0.0306825	0.0258599	0.0203864	0.00196989	0.0084684	0.00249868	0	0	0.0375904	0.0551826	0.00406748	0.00273393	0.00489481	0.0441608	0.0152415	0.0336728	0.0120453	0	0.00218008	0.00661322	0.00515266	0	0.0272496	0.00394936	0.0373969	0.0973367	0.015974	0.0617286	0.0107631	0.246884
AC015911.8	0.194727	0.169578	0.192021	0	2.93291	0.41804	0.0319797	0.353304	2.47701	0.0754804	0.166804	0.128464	0.0922343	0.353886	1.0382	1.05239	0.399229	1.02974	0.575953	0.817819	0.469476	0.857978	0.248713	2.11463	0.140211	0.0468392	0.118554	0.226003	0.169342	0.513548	0.61365	0.595115	0.247805	0.58036	1.12847	0.168979	0.0906287	0.214083	0.432945	0.0240948	0.0307891	0.10194	0.110808	0.196735	2.63345	0.522883	3.59215	0.150991	0.687943
SLFN12L	0.14053	0.069086	0.100581	0.0464089	1.95964	0.18341	0.0744487	0.250174	1.00427	0.11861	0.113259	0.0478504	0.0787311	0.509754	0.479217	0.646178	0.430624	0.64834	0.427675	0.35322	0.417305	0.7934	0.273418	1.51558	0.081603	0.0981375	0.127647	0.0350756	0.0844772	0.389657	0.595984	0.492893	0.240371	0.366213	0.861433	0.0561975	0.133623	0.0569584	0.302369	0.0588973	0.0501739	0.026698	0.167674	0.0610664	1.68026	0.237658	2.25116	0.052726	0.312022
LY9	0.0765409	0.123244	0.0778361	0.0512003	1.75876	0.63792	0.113918	0.267619	1.14525	0.248014	0.334656	0.0220917	0.134066	0.0978056	0.650821	0.938819	0.179809	1.12688	0.186625	0.307977	0.12582	0.387889	0.527842	0.893068	0.185144	0.0517811	0.0345859	0.0925361	0.0653743	0.362133	0.518217	0.397835	0.149658	0.30954	1.9825	0.0400301	0.170695	0.0507151	0.115857	0.0147983	0.0888758	0.0234781	0.192255	0.0644418	0.91652	0.25997	0.191072	0.14142	0.0830458
IGKV4-1	35.7949	12.4147	20.7468	0.0377279	198.94	40.3337	30.9573	72.2018	6604.26	112.547	127.874	5.48242	3.61622	15.8393	441.203	399.392	4.48798	234.783	25.4479	67.5633	21.1241	26.3205	77.0896	79.3386	11.2013	11.9936	9.96472	2.15641	357.771	67.3729	77.8269	136.375	87.1402	111.248	188.184	10.4528	5.81731	3.75641	21.599	8.27644	3.30096	8.01116	10.6977	1.752	1610.98	29.0534	289.475	22.6318	20.1982
AC010247.2	0.111557	0.0890537	0.0330021	0.0207648	0.264604	0.239491	0.0549625	0.126503	0.566026	0.140536	0.127414	0.0294384	0.0880668	0.0633555	0.0615281	0.324061	0.106733	0.442444	0.0682671	0.147954	0.0672396	0.122882	0.197896	0.340295	0.170692	0	0.0169796	0.302108	0.0415775	0.0762758	0.247186	0.177024	0.0946434	0.139993	0.699107	0.0553179	0.129801	0.0350418	0.0354329	0.041411	0.0970133	0.0219001	0.0634806	0.0626151	0.363201	0.121248	0.146993	0.0540633	0.0611559
IGHV1OR15-9	1.29744	0	0.426472	0	0.586177	0.357097	0.152198	1.54133	5.38654	1.07768	0.882058	0	0.0975471	0.0701756	3.35079	4.88333	0.422225	3.71267	0.09452	0.682837	0.101561	0.378083	0.394558	0.452313	0.055608	0.148612	0.564224	0	0	0.39226	1.64277	1.27089	0.589678	1.21143	3.37223	0	0	0.097035	0.0490589	0	0.0488439	0	0.0878928	0.0346778	13.9257	0.711003	1.27201	0	0.26343
CD69	1.20136	1.60955	0.516396	0.215017	20.0655	2.61343	0.94855	1.63012	4.93656	1.73136	3.74915	0.218462	0.680901	3.60383	3.68819	3.73539	3.68403	6.16414	2.19531	2.05975	0.873487	2.77577	3.08744	3.61768	2.43984	0.564982	0.961159	3.58264	0.282236	1.19602	4.03845	1.92359	0.432842	2.00529	18.552	4.56816	1.72638	0.199569	4.08485	0.347809	0.736677	0.146142	3.12234	0.345798	4.11448	2.82613	3.64035	0.477712	0.924092
AC106865.1	0.11314	0.024149	0.0492211	0.154849	0.197323	0.0604476	0.0382546	0.161001	0.275852	0.187031	0.0807634	0.021953	0.0105078	0.264577	0.0367066	0.247281	0.040934	0.0719875	0.0203635	0.0992999	0.262564	0.126254	0.0141673	0.15023	0.00599012	0.144077	0.0202595	0.167358	0.0826813	0.0325034	0.140913	0.13299	0.0917517	0.151375	0.260111	0.020626	0.0103249	0.0574896	0.348787	0.0370576	0.010523	0.283079	0.0473393	0.0224131	0.0722263	0.0468047	0.427506	0.0129013	0.308091
DMBT1	0.0324183	0.0509735	0.0759236	0.00251425	0.0496604	0.0401514	0.0110917	0.0102115	0.00772236	0.00523585	0.0617102	0.0409915	0.0767762	0.012274	0.489216	0.00730013	0.0258471	0.662348	0.23558	0.0223933	0.00444084	0.0148788	0.00575082	0.0131852	0	0.0032491	0.00822375	0.00783858	0.0285278	0.00395815	0.0625204	0.0158775	0.0200544	0.144081	0.0254859	0.00669804	0.00628665	0	0	0.00668555	0.0042715	0.00707124	0.009608	0.00151632	0.00902098	0.00518155	0.00222479	0.450373	0.0411384
IGHV3OR15-7	0.0607504	0.0881742	0.0299532	0	0.828546	0.0501613	0.149654	0.229631	3.3863	0.588705	0.563756	0	0.239792	0	1.50778	1.51849	0	1.02217	0.12392	0.570711	0.0332878	0.0371764	0.0862142	0.296502	0	0	0.138699	0.17627	0.0377363	0.148348	0.658093	2.67783	0.515398	1.28648	0.286557	0	0	0.0954132	0.048239	0.0751705	0	0	0.0432119	0	3.24574	0.0776799	1.05063	0.117765	0
TRAV14DV4	0	0.111722	0.202413	0	2.95166	0.381344	0.126414	0.232765	1.17351	0.0994566	0.0732627	0.0677083	0.162043	0.524583	0.613231	1.00534	0.175347	0.863437	0.994424	0.25522	0.196829	1.19332	0.691844	1.65928	0.184749	0	0.0390531	0.0992641	0.0956282	0.526303	0.833842	0.482555	0.05442	0.643966	2.00561	0	0.278639	0.0805961	0.162991	0.0317485	0.0405692	0.0335801	0.109504	0.0576059	1.15665	0.656167	0.76069	0.0994765	0.12503
G0S2	9.39364	2.0835	1.50246	7.71121	7.12334	1.18528	1.05466	12.2609	32.2512	5.95476	83.5405	0.38213	7.33614	5.0631	9.65356	37.6673	1.10149	12.5912	2.99237	5.98428	1.61453	2.29631	3.55614	7.39026	10.8575	1.63559	3.48818	6.74703	1.76772	4.9567	3.55896	5.89089	18.7485	3.45662	362.367	16.9369	1.93397	0.830624	19.9975	0.264876	8.24267	3.9222	4.72916	15.45	25.607	10.3852	8.95963	3.97877	1.3806
IGHV3-13	0.202878	0.662537	0.450133	0	28.6019	1.71703	3.87326	3.48922	14.607	3.09645	7.67555	0.234224	9.20913	1.44023	28.6732	13.0888	0.0346617	16.7631	9.05267	2.63464	1.33399	0.434531	0.107968	9.71614	0.730404	0.183	0.849179	0.0490549	0.157527	3.14587	7.84188	7.21378	1.39847	6.68302	2.70002	0.691635	0.157371	0.119488	0.20137	0.658965	0.240585	0.165948	0.360769	0.0284681	38.3609	0.843098	6.01476	0.196639	0.865031
C14orf180	0.0143672	0.0938376	0.0425027	0	0.046857	0	0.0412913	0.103183	0.734107	0.139226	1.12301	0	0.124761	0.0489565	0.0066034	0.00970585	0.00490927	0.103603	0	0.166728	0	0	0.0713624	0.0262955	0.355609	0	0.0601362	0.111165	0	0.00350836	0.0141487	0.143547	0.152362	0	5.66843	0.204823	0.0167168	0	0.205349	0	0.454332	0	0.0153291	0.274178	0.377805	0.142375	0	0.0278508	0
TRGV10	0	0.185476	0.27303	0.158575	5.53168	0.281373	0.139911	0.354224	1.36983	0.454062	0.212848	0	0.269017	0.145148	0.626498	1.35249	0.523988	1.63822	1.23817	0.353088	0.350107	0.860212	0.453383	4.132	0.345052	0.102461	0	0	0.264596	0.499283	1.46821	0.500698	0.180691	0.968858	1.32037	0.026403	0.462584	0	0.101472	0.0263537	0.101027	0	0.272691	0.0717261	1.95579	0.62637	0.631432	0.12386	0.285407
KLRB1	0.286173	0.699548	0.475279	0.196247	7.77916	1.41775	0.729703	1.43469	2.90617	0.948718	1.20418	0.50676	0.927439	1.41994	2.99057	2.70656	1.46163	6.37185	1.10604	1.17358	0.544696	2.51626	1.12218	3.32639	1.40986	0.706471	0.320948	0.262213	0.561354	0.948914	4.33115	1.8855	0.654881	2.2563	12.5751	1.01761	0.817828	0.413973	1.20794	0.279553	0.523925	0.216833	1.88557	0.355064	2.40156	0.79925	1.05432	2.39417	0.449542
PTPRC	0.789421	1.39157	3.05986	1.21237	41.393	9.18573	3.18552	7.11616	22.9549	5.05199	9.20412	0.931586	3.91811	15.0419	11.1508	15.1876	8.01758	16.1508	7.6794	8.71907	8.77822	18.4371	5.56828	23.3209	2.40123	1.50091	0.640428	7.99294	2.87745	7.72228	9.04036	8.84128	3.45642	7.19483	29.4997	1.12074	1.77843	1.8434	2.81975	1.57804	0.753857	0.259142	4.91837	2.11162	16.0099	5.81828	14.8968	1.68433	1.86943
MS4A1	0.107435	0.129945	0.0353142	0.0166647	9.36228	10.9001	0.136006	0.233505	7.40574	2.45094	0.495298	0.109269	0.0106016	0.0660993	4.11493	7.62681	0.299804	4.148	0.105009	0.789124	0.117737	1.00536	3.71322	6.48618	0.0644651	0.0269191	0.0136269	0.0519547	0.0333678	1.68996	1.155	0.778754	0.531689	0.561752	14.0176	0.0527192	0.0416684	0.0808525	0.472756	0.0138476	0.0849355	0	2.61735	0.0150754	5.7699	0.850007	1.45986	1.03698	0.0545337
CD2	3.03954	3.10135	3.88114	0.979216	52.9009	5.8346	1.99459	12.0097	28.2844	4.82104	2.54063	1.31112	6.25516	2.99506	25.039	30.2392	9.26762	23.2609	12.3738	8.53479	7.60151	28.1473	11.2725	39.2589	7.40056	3.85873	0.761176	1.65834	3.74387	11.5332	12.5234	10.7566	4.97283	14.8437	44.2201	0.869552	7.32515	1.57088	6.65276	1.24564	3.33747	0.552501	4.18548	2.01955	38.1915	8.05554	21.7797	5.43892	3.5288
IGHV7-27	0	0	0	0	0.509463	0.109139	0.0542686	0.949281	0.377834	0.384264	0.235884	0	0	0	1.82254	0.758997	0	0.158857	0.0337026	0.182607	0	0	0.140686	0.120959	0	0	0	0	0	0.0968307	0.0650841	1.2041	0.140173	0.0518344	0.178137	0	0	0.103798	0.209913	0	0.0522482	0	0.0470093	0	0.275857	0	0.108853	0.0640568	0
AC034105.1	0	0	0.0674181	0.0636288	0.405408	0	0.392979	0.20674	2.68718	0.596272	0.439232	0	0.053972	0	3.20515	0.78517	0	0.739508	0	0.717835	0.149847	0	0.339587	0	0	0	0	0	0.0849363	0.166949	0.336642	2.33052	0.145006	0.375352	0.13821	0	0	0	0.0542878	0	0	0.0447384	0.0486303	0.0383739	1.65515	0.0874204	0.16891	0.0662657	0
CPA1	0	0.140879	0	0	0.0575566	0.00616498	0.012262	0.0451558	0.0747002	0.0361769	0.111926	0.00985143	0	0	0.00686338	0.010088	0.0153076	0.0717876	0.0076151	0.016504	0	0	0.005298	0.0273308	0.0873622	0.0179596	0	0	0	0.0364648	0.0955874	0.0307173	0.03959	0.023424	0.186156	0.0416518	0.0115833	0	0.00592873	0	0.0413192	0	0.00531088	0.037717	0.18699	0.00477355	0	0.00723682	0.0136437
IL12B	0.00789909	0.0343946	0.011684	0.00735153	1.64408	0.0782669	0.00648628	0.0955451	0.604008	0.022964	0.016916	0.0469005	0.0249432	0	0.559105	0.336186	0.113363	0.208856	0.161128	0.126588	0.034626	0.0870097	0.0672602	0.390347	0.0284384	0	0.0240458	0.0229195	0.0196267	0.324055	0.194474	0.176414	0.0251306	0.433674	1.05392	0.00979233	0.159309	0.0186092	0.0815398	0.00977407	0.0124896	0.010338	0.129229	0.0310354	0.158261	0.0353513	0.0975774	0.0689057	0.0625488
TRAV9-2	0.110708	0.0401707	0.627724	0	2.62589	0.822696	0.0909068	0.502158	4.15354	0.214564	0.0790271	0.0730356	0.69917	0.440111	1.17031	1.421	0.870062	2.86064	0.366965	0.764725	0.333638	1.96469	0.864112	2.53278	0.199285	0.133147	0.0421258	0	0.103152	0.702882	1.06299	1.30131	0.234807	0.955121	2.94672	0	0.257625	0.130406	0.131861	0.0342464	0.175045	0.0362222	0.472479	0.0932076	1.66355	0.353897	1.23081	0.107303	0.269734
LINC01055	0.025345	0.00919655	0.0374893	0	0.300582	0.104636	0.0520297	0.0574812	0.153955	0.184206	0.135691	0.00836027	0.0100041	0.0431818	0.011649	0.239708	0.103925	0.0152304	0.0258497	0.182077	0.0347191	0.0697948	0.0629449	0.0927754	0.0570297	0.0152411	0.0289324	0.0367698	0.0472307	0.0866468	0.212157	0.17875	0.013439	0.11927	0.13663	0	0.0196599	0.0398063	0.0905638	0.0156805	0.0200371	0	0.00901399	0.0142258	0.528954	0.048612	0.156543	0.0245657	0.015438
FCRL5	0.0368787	0.0293121	0.0406957	0.0016344	0.692497	0.317556	0.0447031	0.265521	1.88499	0.433956	0.167981	0.00579274	0.0304997	0.0319149	1.41251	1.15433	0.0336039	0.74715	0.0788085	0.146539	0.0606224	0.144006	0.280375	0.889251	0.0110643	0.025345	0.020047	0.00339699	0.34362	0.201552	0.195425	0.348856	0.312874	0.652865	1.88156	0.0195933	0.00136222	0.00551628	0.0683286	0.0195568	0.00416505	0.0781435	0.108675	0.00295706	2.65204	0.108908	0.660928	0.0493618	0.20431
IGKV1OR2-3	0	0	0.0746749	0	0.404141	0	0.124366	0.0572483	1.51527	0.146767	0.108113	0	0	0.172028	0.139222	0.306947	0	0.819108	0	0.0418475	0	0.0926828	0.107468	0.138599	0	0	0.0576305	0	0	0	0.223727	0.356052	0	0.118787	0.102057	0.0469386	0	0	0.120262	0	0.0598677	0	0	0	1.13791	0.0484151	0.436546	0	0
IGHV7-34-1	0.0623125	0.0452208	0.18434	0	0.0369501	0	0	0.188429	0.222652	0	0.578252	0	0	0	0.458238	0.126287	0	0.0748899	0	0.137738	0	0.114397	0.0442156	0.0380158	0	0	0	0	0	0.0304325	0	0.109867	0	0.439852	0.0419894	0	0	0	0.0494795	0	0.0492626	0	0	0.034975	0.104038	0.0398387	0.153949	0	0.0379555
MEOX1	0.797609	3.88227	0.0675301	0.0449891	10.7015	1.49678	1.19744	0.60907	2.76362	2.81065	7.90206	0.350798	0.30529	0.732087	2.14032	1.56206	0.616664	4.60904	0.271164	3.58401	0.0573897	0.138048	1.32059	1.45982	4.22758	0.0484484	0.472114	0.264936	0.210191	2.46709	19.7164	1.46314	1.87967	0.309628	14.0014	4.44451	1.2499	0.45553	0.59496	0.0947059	0.503181	0.0158163	2.15475	0.777797	2.5087	1.17956	0.364921	1.46027	0.711577
TRAV6	0.0539836	0.0391764	0.133084	0	1.47252	0.44574	0.0886566	0.0408107	1.19593	0	0.0385355	0	0.255699	0	0.198494	0.510566	0.295139	0.908318	0.605645	0.0596637	0.1479	0.132142	0.497973	0.724559	0	0	0	0	0.033533	0.316377	0.478465	0.507638	0.114497	0.50808	1.4187	0	0.334997	0.0423928	0.257195	0.0333988	0	0	0.0383987	0.0303002	1.03651	0.103541	0.533487	0.0523236	0.164411
CD226	0.0799581	0.0765948	0.0725394	0.0699506	1.25456	0.217869	0.128688	0.22728	0.583976	0.14567	0.28881	0.0949495	0.19189	0.666617	0.408661	0.312214	0.293982	0.709197	0.419169	0.293393	0.186641	0.901302	0.310916	1.00587	0.156887	0.107705	0.0498974	0.224269	0.172843	0.251484	0.400011	0.315794	0.132279	0.348679	0.976304	0.222034	0.111641	0.0828832	0.159997	0.111799	0.0556272	0.0209291	0.20816	0.0592406	0.632785	0.121666	0.613705	0.0852494	0.0681851
IGLV2-18	1.10796	0.76174	2.67392	0	3.21584	2.98527	1.34075	0.529011	4.29231	3.39056	9.61574	0.769413	0.414314	1.19223	78.4227	10.6759	0.996293	19.0629	0.713701	6.12271	0.223669	1.49878	0.496539	7.61333	0.839769	0.210401	1.77514	0	1.23158	2.87644	7.17839	7.12865	3.15388	3.33874	1.10026	0.795195	0.316635	0.0457933	1.38913	2.02036	0	0.381592	0.871055	0.261845	38.6038	0.186411	3.21757	1.46954	0.710396
IGKV1OR10-1	0	0	0.0326844	0	0.0393086	0	0.108867	0	0.33161	0.192716	0.0473202	0	0.0523315	0.0752948	0.182808	0.268696	0	0	0	0.0732649	0	0	0.0940757	0	0	0	0	0	0.494128	0.06475	0.391692	0.779202	0	0.207968	0.0446696	0	0	0.0520568	0.105275	0	0	0.0433785	0	0	0.387374	0	0.163776	0	0
GIMAP6	1.23176	3.72121	2.36334	0.902576	16.4821	3.44695	5.77122	5.72196	7.97406	5.32549	6.98247	1.36416	6.71435	8.95792	5.27712	7.11258	2.77675	11.9703	4.84893	9.31394	5.1918	6.17007	5.01875	13.462	3.99816	2.16516	2.36684	3.67642	2.14652	4.21645	19.5128	6.84624	3.706	4.72113	15.2221	4.73987	3.83051	2.90186	2.12877	1.05517	3.10645	0.361074	3.00905	3.24411	10.9249	5.02794	7.61943	2.60385	1.31045
CD28	0.312519	0.113399	0.180504	0.905808	4.29143	0.90316	1.41143	0.641275	3.33409	0.393703	0.659702	0.203229	0.179748	0.573026	1.08345	1.80964	1.10754	2.5809	0.603335	1.07321	0.523514	1.34419	1.06126	2.60936	0.325486	0.236258	0.258222	0.349761	0.166395	0.968108	0.782608	1.32771	0.411909	0.903415	5.11437	0.154969	0.304755	0.480318	0.37578	0.0994374	0.0741208	0.040901	1.42269	0.205483	2.35549	0.371067	1.11404	0.229346	0.258346
VMO1	4.86162	1.28116	0.910606	7.17872	0.805263	0.313961	2.78777	2.11484	1.08692	2.28979	2.61734	0.215014	5.83193	3.67107	4.26923	4.2384	0.0742443	2.87249	1.56509	1.2007	1.7412	0.58172	3.16062	4.65611	3.78903	1.33926	0.516737	4.04535	1.83893	0.397934	1.45771	0.590612	1.61295	1.129	6.99126	0.117843	0.905911	0.597194	9.18728	0.453691	2.49074	0.888639	0.444335	0.564043	3.35564	2.53519	0.246037	1.13196	1.53854
IGLV5-45	1.48326	0.239203	1.67934	0.153382	59.5808	2.17728	3.24791	26.3717	256.319	8.03857	5.56852	0.0362418	0.0867358	1.43515	13.4326	10.8367	1.12629	12.1484	0.53228	1.91254	2.16731	3.79883	2.41682	2.212	0.197779	1.58569	1.00338	0.159398	0.102373	1.93173	22.4516	3.1964	0.64084	5.68742	8.77335	1.25989	0.085226	0.647104	0.0872433	0.679753	0.130292	0.179742	0.898742	0.0308344	149.872	0.526834	47.6389	1.01168	0.200772
IGHV1OR21-1	0.0617829	0	0.152311	0	0.329724	0.0510139	0.0507327	0.0934137	2.60497	0.299356	1.01437	0	0.0487736	0	0.283965	0.709544	0	0.965295	0.0315066	0.136567	0.0677071	0.0756165	0.263039	0.339235	0.055608	0	0.141056	0	0	0.211217	0.365061	0.472046	0.196559	0.629942	1.04081	0	0	0	0	0	0	0	0.0878928	0.0346778	5.41556	0.0395001	0.508803	0	0.0752658
IGHV3-23	10.2989	5.27576	12.8192	0.234926	145.132	31.8473	29.0601	151.174	918.832	63.8439	99.9328	1.13239	55.2381	11.4685	380.307	402.681	2.07008	121.835	13.1557	42.6844	18.3127	20.8227	22.1385	68.8993	6.63408	2.0644	7.3767	3.12498	262.229	64.4753	61.8977	140.878	311.324	203.68	79.911	6.22719	3.17201	4.55918	7.21575	8.808	3.23286	12.7849	12.353	0.396707	1182.21	15.8156	245.505	5.77401	44.6811
LEP	0.00637701	0.208254	0.00314421	0.0237399	0.650408	0.00526547	0.0366551	0.612255	1.2988	0.420218	6.38211	0.00420702	0.221506	0.0941625	0.29896	0.0215402	0.265841	0.490507	0.0943081	0.059908	0.013977	0.0468292	0.013575	0.933723	2.49675	0	0.155299	0.283715	0.0118836	0.488967	0.0251202	0.258606	1.54866	0	11.28	1.94079	0.0296796	0	0.187356	0.00394535	1.64857	0.0250378	0.0362879	0.41878	3.42838	0.199776	0.0525168	0.105076	0.20587
TEX11	0.0452879	0.0281708	0.035089	0.0120425	0.222512	0.05342	0.0690633	0.15162	0.212679	0.0689646	0.0184733	0.0384136	0.0459666	0.117577	0.035683	0.13112	0.0530568	0.186614	0.0857811	0.0536283	0.0638106	0.878933	0.096406	0.232877	0.0116462	0.0389053	0.0246182	0.050059	0.0321503	0.126388	0.11787	0.0608383	0.0411661	0.121782	0.0741136	0.0641629	0.030111	0.0101612	0.0256864	0.0560378	0.046033	0.0381026	0.0460192	0.0762582	0.28625	0.111681	0.122544	0.0125415	0.185217
IGHV1-17	0.0652975	0	0	0	0.154881	0.0539159	0.0536187	0.197455	5.92628	0.126554	0	0	0	0.370838	0.720285	0.176449	0	0.392387	0.033299	0.108252	0.0357794	0.039959	0.231668	0.0796739	0	0	0	0	0.0405609	0	0.321523	0.191884	0	0.409709	0.220004	0	0	0	0.103699	0	0	0	0	0	3.70673	0	0.215099	0	0
SAMD3	0.0379129	0.0687843	0.105927	0.0382252	1.4613	0.130435	0.0337262	0.207796	0.598319	0.137774	0.0563825	0.033349	0.0798126	0.301441	0.522762	0.452484	0.187845	0.577161	0.19495	0.240937	0.171386	0.500753	0.244361	0.505005	0.108058	0.0455975	0.0216396	0.0336129	0.0431756	0.217564	0.33136	0.241391	0.0502575	0.23045	0.817525	0.0137083	0.0735218	0.0595451	0.095332	0.0136827	0.0749322	0.0124046	0.146074	0.0567464	0.69366	0.179773	0.640061	0.116366	0.0500355
IGHV1-46	9.85584	1.71563	10.3263	0	21.0079	4.59133	8.63989	254.965	240.281	17.1657	24.5766	0.351463	1.20914	1.24805	34.4335	43.2107	8.30558	30.4533	6.70707	7.10244	1.20415	12.083	6.26106	18.1402	0.599377	0.881007	3.44622	0.128816	0.475708	12.9443	35.1678	14.9118	10.5226	34.6024	13.1257	0.681075	0.568217	0.261476	10.9988	1.31841	0.157941	1.45984	3.52893	0.448535	309.484	6.98242	22.9239	1.12955	3.67096
IGHV2-26	0.343455	1.32932	2.37078	0	19.5855	1.51248	2.82026	5.53911	371.928	8.81992	5.51634	0	1.08454	0.455128	57.618	19.0646	0.352076	20.4326	0.758971	7.33879	3.48159	2.90747	0.487416	5.06379	1.08195	0	0.435632	0	0.355573	3.9698	8.11758	12.2459	0.971275	147.708	4.7059	0.31933	0.222013	0.134856	1.13634	3.0811	0.271526	0.449497	0.651468	0	540.177	3.11077	17.1122	0.443858	1.98743
IGKV1-33	0.0518037	0	0.076626	0	0.153593	0.0427741	0.0850766	0.587441	2.33229	0.953814	0.147918	0	0.122687	0.117682	1.90479	0.664931	0	0.74712	0.369848	0.257645	0.0283855	0.126806	0.147035	0.41086	0.139878	0	0.197121	0	0.0321789	0.202401	0.612193	0.852495	0.164811	0.284412	0.0698161	0	0.0401838	0.0406809	0	0.0961504	0	0.0677983	0	0	1.1244	0.0993602	0.469283	0.0502108	0.0631088
IGKV2D-28	0	0.0393713	0	0	0.0643409	0	0.0890977	0.123041	0.542784	0.105147	0.890725	0	0	0	2.14443	1.83252	0	0.260811	0.497993	0.0299803	0	0	0.0384962	0.0992951	0	0	0.0412875	0	0.0336998	0.0529919	0.0801409	1.27541	0.0575335	0.382956	0.0365579	0	0	0	0	0	0	0	0.0385897	0	32.3824	0.312169	0.625498	0	0.0330458
SPATA20P1	0.398345	0.0361353	0.564665	0.139024	0.0590526	0	0.245324	0.903425	1.45893	0.0965046	0.106632	0	0.353775	0.339342	1.37315	0.605485	0.0680573	0.179531	0.152354	1.07313	0.79123	1.79779	0.353321	0.15189	0	0.179657	0.037894	0.0481589	1.51557	0.851137	0.073554	1.9022	1.63695	0.312426	2.31517	0	0.0386241	0.78204	0.47446	0.184837	0.0787301	0.1955	0.212508	0.950235	0.249405	0.222842	0.32805	0.772192	0.272967
IL6	0.421641	3.89371	0.0103946	0.137345	3.66286	0.0870367	0.597243	0.199221	0.941618	0.245156	104.576	0.354659	0.00832144	0.119729	16.4531	1.32452	0.561892	6.47369	0.0537547	0.518431	0.179053	2.55444	0.949919	0.540196	1.08157	0.240875	0.377035	0.0305852	0.17679	1.22524	4.97238	0.421274	3.58832	0.0826745	16.8911	4.49522	0.31071	0.0744998	1.38107	0.058694	0.125002	0.213832	5.93831	0.100581	1.39035	0.606534	0.911492	0.684532	0.308193
IGHV3-62	0	0.139652	0	0	0.418405	0	0	0.145478	41.7146	0.497283	0.54947	0	0.101277	0	1.12033	0.780008	0.0876738	2.92952	0.196268	0.177236	0.035148	0.0392539	0.0455161	0.0782679	0	0.154294	0.0976328	0	0	0.0939827	0.284264	1.09329	0.13605	1.20744	0.605141	0.0397598	0	0	0	0	0	0.0839502	0.0912534	0	4.81939	0	0.211303	0.0621728	0.117215
TRBV13	0	0	0.0575036	0	1.07195	0.529644	0	0.176337	1.62524	0.282547	0.0416266	0.0384706	0.0460349	0.13247	0.107208	0.787887	0.557924	1.26151	0.297376	0.161124	0.159764	0.178427	0.206891	1.31632	0.104971	0	0	0.2256	0	0.284796	0.229709	0.205634	0.123682	0	1.5718	0	0	0.0915865	0.185217	0	0.230507	0	0.414788	0.229114	1.07098	0.186411	0.14407	0.169562	0
IGHV3OR16-10	0.0623125	0	0.307234	0	0.18475	0	0.20467	0.188429	1.87028	0.181153	0.177924	0	0	0.212331	0.744637	0.168383	0	0.449339	0.0317767	0.103304	0	0.0762647	0	0	0	0	0	0	0	0.0912975	0.306825	1.64801	0.0660814	0.0488724	0.209947	0	0	0	0	0	0	0.0815517	0.0443231	0	4.6817	0.0796774	0.153949	0	0.0379555
IGHJ2	0	0.913112	1.03396	0	8.70458	2.77045	2.41078	5.39015	6.89365	9.75439	6.5866	0	0.993292	0	14.2649	14.4501	0	20.6667	0.855527	3.47656	1.14907	3.33658	2.08323	5.37339	0	0	0.638369	0.405646	25.792	2.66284	6.81506	12.0784	2.22389	8.88162	14.6963	0	0	0.329359	0	0.778448	0.331575	1.09781	2.38663	0.235409	52.8691	1.34073	5.18098	0.813029	0.25547
PRKCB	0.102126	0.337455	0.113563	0.129426	4.67978	1.73315	0.335441	0.683352	3.18328	0.943336	1.01442	0.127581	0.363656	0.478805	1.32827	2.28114	0.567255	3.29569	0.793389	0.805713	0.55245	1.53981	0.877307	3.9849	0.357898	0.159413	0.100872	0.241682	0.237554	1.13868	1.23256	1.03059	0.44243	0.916875	5.61671	0.238392	0.273051	0.179167	0.400292	0.19224	0.173501	0.271581	0.417309	0.191479	2.40711	0.537626	1.27409	0.273791	0.153531
IGHV3-73	0.349349	0.36218	4.47844	0	11.3936	1.89557	3.89318	5.77252	5385.11	6.38388	12.2908	0.065849	0.827365	0.79361	70.2824	13.3174	0.136426	11.8761	2.7232	4.02655	0.464886	1.31325	11.5446	5.29786	0.583947	7.56288	1.25336	0.193077	0.341008	2.43738	7.24936	7.18622	46.204	10.138	86.3617	0.21654	0.116138	0.235149	1.46627	0.586657	0.276186	77.2035	0.567985	0.224096	194.94	0.638149	16.6044	0.19349	3.4047
IGKV1-39	0.383582	0	0.0810541	0	1.29975	0.180984	0	0.289981	4.46423	2.07097	1.21261	0.0361508	0.43259	0.0622412	8.96616	3.33169	0.112346	2.37089	0	0.75704	0.0300259	0.570069	0.349948	0.367741	0	0.0659045	0.125107	0	0.408462	2.1945	1.43005	2.76969	0.406782	3.39528	0.812357	0	0.0425059	0.0430319	0.0870241	0.0678045	0.0433214	0.0358581	0	0	21.8205	0.245238	2.48201	0.0531124	0.16689
MPEG1	2.03757	1.98108	5.01589	3.00214	27.6585	8.69585	8.87771	8.92671	18.2628	4.90062	12.8521	1.73615	6.61241	7.11037	10.1052	14.9192	8.83468	22.3523	9.9	17.5029	10.5809	11.3963	6.22572	20.0422	5.33385	2.19666	1.08359	11.6105	4.05627	11.4547	15.383	16.9703	5.4567	5.38345	34.3057	2.32508	2.25082	4.14479	4.53803	1.65246	1.31197	0.658637	8.54581	3.00382	23.0103	7.74397	17.3583	3.0171	2.5241
IGHV1-58	0.263398	0.420531	0.727268	0	3.34246	15.6156	1.1247	9.19955	81.6176	2.09303	3.64765	0	1.33079	0.359014	16.6097	3.98587	0	12.7892	1.02085	2.8529	0.173193	0.902649	0.336423	1.99262	0	0	0.240545	0.0509508	24.6732	2.52134	1.76387	8.04987	0.670391	3.3467	3.26584	0.0653059	0	0.0413688	0.460135	0.195552	0	0.275778	0.599539	0	27.6617	1.1788	4.72879	0.306359	0.256704
IGLVI-70	0	0	0.0275723	0	0.132641	0.0923482	0.0459196	0.29593	0.359669	0.0541911	0.439107	0	0.0882926	0	5.39752	0.642228	0	0.940924	0.0855527	0.0927082	0	0.102664	8.45198	0.10235	0	0.201769	0	0	0.0694735	0.21849	0.24782	0.657327	1.30468	6.05266	0.0753656	0	0.130134	0.0439145	1.33214	0	0	1.171	0.27844	0	3.78137	0.0357527	14.2304	0	0.13625
FCAMR	1.57673	0.00446972	0.00303676	0	0.0365222	0.523811	0.00505751	0	0.0176059	0.358111	0.00439659	0.077202	0.0194488	0	0.016985	0.291258	0	0.0148045	0.0125635	0.00340358	0.0134994	0	0.0786665	0.0563635	0.0166306	0	0	0	0.00382585	0.0451202	0.00303272	0.0144794	0.0391897	0.0966131	0.464836	0.00381766	0.0143327	0	0	0.00762107	0	0	0.0525719	0	1.96411	0.161447	0.0862278	0.0119394	0.0412676
TRBV27	0	0.122692	0.222288	0	1.77112	0.0930641	0.138827	0.340827	1.32901	0.109222	0.0402283	0.0743567	0.133466	0.192031	0.466231	0.304568	0.077026	0.948218	0.373602	0.155712	0.370552	1.10357	0.399883	1.13458	0.20289	0.135555	0	0	0	0.110092	0.249741	0.496817	0	0.486199	0.531648	0	0.174856	0	0.223744	0.0348659	0.0891054	0	0.0400855	0.0632623	0.846818	0.504418	0.417692	0	0.0343267
CHRDL1	6.0254	2.85456	0.0411474	0.0103559	12.4179	2.56796	3.52233	3.54566	6.37342	1.55274	24.1627	0.866217	0.667601	3.18497	0.567684	2.60467	5.13294	5.12193	0.607162	9.19893	0.185961	0.687744	3.08325	2.5491	1.41213	0.187357	0.931497	0.877107	1.44459	1.33142	31.6194	8.60955	15.1043	0.0741814	29.3701	6.47293	0.271886	0.310202	2.12938	0.058516	0.822509	3.03998	2.49317	4.07522	9.44235	1.02087	1.15462	0.652497	4.40893
LILRA4	0.110504	1.37058	0.0247655	0	2.57936	0.796296	0.263969	1.51129	2.08909	0.262843	0.286842	0.0463916	0.285497	0.684624	1.25588	2.3617	0.48057	5.37269	0.455939	1.20465	0.0935768	0.141394	0.762724	1.19511	0.235085	0.0966559	0.214064	0.524668	0.0998422	0.38759	1.0635	0.454618	0.202414	1.0873	5.56442	0.342472	0.670149	0.386553	0.343006	0.0621515	0.571818	0.0131474	0.464463	0.0620239	2.93519	0.256906	0.752845	0.46737	0.0244761
IL9R	0.00870981	0.0632079	0.163187	0.607955	1.03295	0.179791	0.0572161	0.362146	0.634879	0.0928433	0.0683912	0	0.16502	0.148395	0.0800636	0.258895	0.0952367	0.198889	0.324239	0.240656	0.229079	0.36244	0.0803438	0.738607	0.078393	0.157129	0.0132569	0.101088	0.0324617	0.0595524	0.167259	0.358327	0.110839	0.252755	0.176074	0	0.148635	0.0410384	0.0414963	0.0484976	0.261658	0.0797929	0.0123906	0.014666	0.312653	0.178192	0.150629	0.177282	0.0159158
CD40LG	0.0480118	0.487797	0.21897	0.0446837	3.78652	1.18929	0.246404	0.825737	2.59046	0.325683	0.411271	0.0633484	0.767519	0.272669	0.882682	2.27043	0.910514	2.33696	0.477438	0.683194	0.249924	1.17524	1.28607	1.64763	0.950691	0.288718	0.0639423	0.0928723	0.178941	0.586206	1.14067	0.726605	0.203663	0.837851	4.90955	0.185998	0.828644	0.094258	0.333585	0.0742603	0.256209	0.0628356	0.623255	0.202112	2.40483	0.268588	1.59146	0.442087	0.146224
AC067945.1	0.0352903	0.0512209	0.1218	0	0.23019	0	0.0579567	0	0.126098	0	0.0251915	0.0232816	0.111437	0.240505	0.1622	0.143043	0.120587	0.0424134	0.0719861	0.0195017	0.0773483	0.0863839	0	0.10765	0	0	0	0.0682641	0.0219212	0.0689409	0.0521305	0.103704	0.0374247	0.442857	0	0.0656229	0.0273744	0.166278	0.0280223	0.043667	0.0278995	0.0461862	0.175714	0.0198079	0.0883815	0	0.261564	0.13682	0.0644874
ACKR1	1.43946	38.0125	0.403372	0.14457	17.9188	2.52247	6.50527	4.32151	9.62818	16.2372	66.5683	1.01112	1.8149	2.04669	3.00814	6.46426	5.74667	71.7517	0.866089	16.9221	0.136186	0.221805	11.6323	10.1466	19.6762	0.448376	2.77414	0.580926	0.488888	5.01717	109.281	8.64263	1.33983	2.18487	83.0975	14.648	12.3547	1.26864	2.45048	0.0640698	9.94725	0.0271064	4.38285	5.40569	9.38859	4.54192	3.46252	14.2732	0.0315394
IGHV1OR15-2	0	0.313855	0.243698	0	1.02581	0.306083	0.355129	0.560482	42.4301	2.09549	1.5877	0.0815185	0	0.140351	3.06682	3.9651	0.548892	7.94512	0.252053	0.580411	0.0677071	0.22685	0.482238	0.226157	0.111216	0	0.0470187	0.0597553	0.115133	0.693999	0.973496	5.95504	0.720718	1.55063	1.24898	0	0.0479245	0	1.42271	0	0	0.161717	0.175786	0	16.8656	0.750503	32.5125	0.0598831	0.52686
IGHV3-20	2.73274	0.343242	0.259113	0.0489098	3.98883	0.911243	0.345227	0.317831	4.50669	0.560192	1.95073	0	0.124461	0.77599	51.4966	1.91713	0.0359146	2.77905	1.47398	0.958357	3.94504	0.0964794	1.82722	0.480923	0	0.0632048	0.919866	0.050828	0.359086	1.30896	2.82057	3.52105	3.67826	4.28664	2.83302	0.423465	0.0407647	0.123807	1.79438	0.0975405	0	21.4933	0.635475	0	55.9798	0.268791	7.22757	0.101874	0.256085
AC134879.2	0	0	0.0829294	0	0.332456	0.277757	0.230188	0.127153	3.24534	1.52125	0.480257	0	0	0.0636812	0.824593	1.02263	0.07663	0.539053	0.0285909	0.371786	0.0614412	4.0485	0.159131	0.0342045	0.201847	0	0.213337	0	0.278608	0.273814	0.993829	1.12033	0.118913	1.09932	1.24673	0.0347515	0	0	0.222594	0.0693733	0	0	0.0398794	0	2.15297	0.358446	1.06195	0.163024	0.0683003
IFNG-AS1	0	0.0446888	0.015181	0	1.15023	0.330498	0.0252828	0.155177	0.366721	0.198913	0.0512839	0.00677083	0.0243064	0	0.641533	0.069334	0.133264	0.0740088	0.0157014	0.198505	0.0224947	0.0439643	0.262172	0.413255	0.0738997	0.0493741	0	0	0.00637522	0.130323	0.257733	0.271437	0.010884	0.0321983	0.442617	0.0127231	0	0.00805961	0.00814956	0	0.048683	0	0.0292011	0.0115212	0.27417	0.150918	0.0422606	0.0397906	0.0250059
AP001434.1	0.303963	0	0.524545	0.141447	0	0	0	0.172343	0.868887	0	0.0542451	0	0.179969	0.0863135	0.349267	0.770042	0.0519322	0.273987	0.503777	1.04983	0.999329	1.90662	0.107843	0	0	0	0	0.146994	0.991268	0.222677	0.261924	1.38451	1.04763	0.655606	1.5874	0.0942043	0.117891	0.11935	0.301704	0.188057	0.180229	0.14918	0	0.767745	0.697814	0.0971676	0.500648	1.32577	0.231436
GZMK	0.180587	1.14924	0.198626	0.142212	27.4795	2.77574	1.22053	4.04312	13.4414	3.19037	1.35851	0.329916	0.67991	1.24649	9.51319	6.13739	3.17077	10.0839	2.1677	3.63097	1.3701	8.85787	3.01623	8.83929	3.57584	0.367554	0.0211434	0.483675	0.293382	3.38537	5.49256	2.70237	0.869159	4.08567	15.4639	0.404688	2.21973	0.469075	1.44499	0.111726	1.80106	0.0272705	1.43274	0.56918	6.03021	2.4601	3.08879	2.06002	0.693836
P2RY13	0.213044	1.94691	0.509648	0.066092	3.32671	1.24439	1.57446	1.36601	1.93411	1.55221	1.39124	0.61425	3.24533	5.19817	1.86408	2.59062	1.66625	3.12944	1.04217	3.65399	0.458297	2.21151	0.856637	4.74167	3.4089	0.398574	0.192157	7.14313	0.200955	2.60504	4.67009	3.38997	0.451859	2.08556	4.25363	0.753191	0.471287	0.408958	0.626549	0.737141	0.548946	0.118757	0.724019	0.33659	3.37915	2.94611	2.22235	1.13953	0.259536
IGHV3-75	0	0	0.0300368	0	0.0361244	0	0.0500241	0.460545	0.304747	0.295175	0.217435	0	0	0	0.503998	0.370395	0	0.292866	0.0931998	0.13466	0	0	0.0864551	0.0371663	0	0	0	0	0	0.0892573	0.119987	0.322237	0	0.0955606	0.164204	0	0	0.0478399	0	0	0	0	0.0433326	0	0.254282	0	0	0	0
IGKV1D-39	0.116007	0	0.0857967	0	0.103185	0.766294	0.0476293	0.131549	3.4819	0.337253	0.372646	0	0.0457901	0	0.959741	0.744511	0.0396397	1.32452	0	0.256427	0.127131	1.63279	0	0.106161	0	0	0.132428	0	0.324271	0.283281	0.656899	1.19315	0.0615119	0.818873	0.234515	0	0	0	0.092116	0	0.0458561	0.0759124	0	0	1.93687	0.0741678	0.573215	0	0.0353309
TRBV6-6	0	0.20396	0.110857	0.0523134	1.66656	0.417709	0.0923125	0.382442	1.44609	0.0544704	0.120374	0	0.133122	0.191536	0.775049	1.67081	0.384138	1.14844	0.229316	0.993985	0.277198	1.27272	0.598278	2.12614	0.303551	0.067603	0	0	0.0698316	0.466684	0.415163	0.561608	0.298047	0.396774	2.57564	0.104523	0.30521	0.0882818	0.312435	0.034776	0.0444379	0	0.239893	0.0946489	1.68927	0.179685	1.20355	0.108963	0.171191
CD209	0.40525	0.150633	0.489778	0.694524	1.47407	0.514162	1.02266	0.657558	1.23612	0.215512	1.70747	0.0228226	0.46037	0.319964	0.51335	2.02322	0.871374	2.89259	0.602339	1.22624	0.685119	0.75608	0.596154	1.76985	0.1201	0.101045	0.0865045	0.119497	0.583275	0.202745	0.790876	1.21701	0.875245	0.333347	7.54296	0.272633	0.0920047	0.128072	0.521928	0.137591	0.144562	0.0776154	0.706578	0.244104	3.2469	0.176941	1.14366	0.201185	0.469605
ICAM3	0.118288	0.134129	0.236934	0.103208	1.97276	1.18425	0.206405	0.514187	2.21369	0.687767	1.30352	0.082914	0.496085	0.436659	1.38637	2.03771	0.141467	2.23908	0.358161	0.616903	0.332178	0.438845	0.723937	1.79061	0.286127	0.186722	0.0900208	0.450474	0.2388	0.444108	0.651613	0.869008	0.290086	0.817578	3.02395	0.0595722	0.344082	0.116113	0.317004	0.0594611	0.140273	0.0435403	0.241899	0.116188	2.79579	0.524656	0.986319	0.128982	0.21165
FABP4	0.312455	21.6208	0.0154057	0.348956	18.6947	0.464387	5.9781	53.3364	78.7098	6.01032	129.175	2.02009	14.6271	16.3254	2.65678	2.74406	9.02173	21.6113	0.924165	23.8365	0.941643	0.219889	4.16817	11.5899	50.0161	1.07099	8.41769	13.1608	0.591968	1.40391	17.6161	25.2593	32.8703	1.39685	396.842	88.7115	1.16337	1.01828	28.8423	0.183645	35.8671	0.184017	11.8015	54.3491	100.162	21.6844	0.5275	5.52696	0.0380642
TRBV4-2	0	0.139141	0.3545	0	1.16535	0.672823	0.354237	0.28989	2.8431	0.139348	0.307945	0.094866	0.681115	0.27222	0.440614	1.81335	0.131029	1.03694	4.10653	0.635714	0.183851	2.31727	0.272096	2.04701	0	0.288242	0	0.324517	0.0595487	0.983204	1.48692	1.01416	0.101664	0.563913	2.58396	0.0297106	0.074362	0	0.0761222	0.0889655	0.151577	0.0940981	0.0681893	0.0269039	1.76064	0.429032	0.710535	0.185835	0.058393
BHLHE22	0.153776	0.101892	0.148342	0.043557	1.63342	0.314669	0.170192	0.535768	0.864808	0.304513	1.44611	0.180843	0.311406	0.622717	0.448651	3.57271	0.219319	0.731221	0.289809	1.05668	0.289416	0.576895	0.540834	0.203948	0.246724	0.289479	0.13738	0.135796	0.0913677	0.56816	1.6263	1.11596	3.24026	0.309385	1.92827	0.576041	0.285241	0.194263	0.244212	0.219232	0.295998	0.153128	0.337654	0.21015	0.725585	0.341963	1.1838	0.395298	0.122174
TRAV41	0	0.235525	0.064007	0.0604095	1.8475	0.42876	0.0532995	0.19628	1.62351	0.188701	0.278006	0.0428215	0.102483	0	0.715997	1.22779	0.310511	0.858113	0.0993022	0.322823	0.248965	1.03275	0.368463	1.18799	0.467372	0.0780654	0	0	0.161278	0.475508	0.255688	0.72482	0.413009	0.712723	2.09947	0	0.151048	0	0.309246	0.040158	0.0513152	0	0.0923397	0.145729	0.758608	0.0414987	0.213818	0.125826	0.118611
TRBV6-5	0.212774	0.0772062	0.340954	0	4.92067	0.790591	0.174718	1.04555	3.34521	0.20619	0.303772	0	0.503914	0.543775	0.440076	2.91076	0.472583	2.62115	1.13931	0.911254	0.816119	2.89713	0.45294	2.95318	0.909665	0.0639756	0.0809638	0.411583	0.132169	0.519579	1.59773	0.90663	0.282055	0.834407	3.51277	0.0329715	1.03155	0.125317	0.126716	0.09873	0.12616	0.0696173	0.416204	0.208997	3.46369	0.544139	4.77493	0.309347	0.226807
KLHL6	0.227483	0.585306	0.244715	0.271379	2.78614	0.74108	0.433027	1.33513	2.43997	0.731472	1.51314	0.096866	0.360798	0.878506	1.26036	2.03273	0.713711	1.20544	1.24021	1.18966	0.758084	1.34526	0.855508	2.11834	0.323872	0.378054	0.270698	0.714055	0.674412	0.757494	0.923588	1.82435	0.598718	1.18891	3.47131	0.182022	0.396225	0.297191	0.425309	0.149696	0.295921	0.092022	0.529557	0.487515	3.02637	0.556631	1.42548	0.306678	0.229259
TRAV30	0.0647163	0	0.0319086	0	1.03614	0.427487	0.0531413	0.195697	0.416234	0.125427	0	0	0.0510892	0.294029	0.535404	0.568354	0.265363	0.466673	0.0990075	0.178814	0.106383	0.871273	0.137764	0.6712	0.0582481	0.467003	0.049251	0.187777	0.0803996	0.126426	0.254929	0.494458	0.0686305	0	0.566919	0.0401137	0.0501999	0	0.154164	0.0800778	0.0511629	0	0.0920657	0.108973	0.59428	0.0413755	0.213184	0	0.0394196
EPYC	1.29286	0.00876857	0.762552	0.0112452	0.150461	0.00997668	0.0396867	4.59458	2.57314	0.491773	0.0603758	0.0318848	2.50864	0.452895	0.344313	0.261203	0.148633	0.0290432	1.17688	2.68417	7.11722	5.10192	0.334373	0.287488	0	2.01993	0.0919534	33.5511	3.38496	0.442578	0.0178486	2.30083	2.93431	8.91753	3.01254	0.0149787	0.581095	0.408004	0.0575661	0.246688	1.03165	0.150227	0.163296	1.18004	0.574945	9.26995	2.39808	0.796363	0.0220794
CD300LG	0.00459629	3.52236	0	0	0.89124	0.0113854	0.298163	0.493409	0.561675	0.0445406	2.62152	0.127354	0.0435416	0.0522065	0.0760511	0.260825	0.116221	1.13795	0.00234391	0.439412	0.0176295	0.00562542	0.332665	0.106556	1.61753	0.0276396	0.132921	0.111136	0.00571015	0.168357	1.45524	0.172886	0.1706	0.0288394	6.65591	0.957251	0.0713061	0.0397036	0.171536	0.00853094	0.26526	0	0.480595	0.123831	2.34057	0.138113	0.0681335	0.089099	0.00559933
CHIT1	1.04956	14.2507	0.00417329	0.110284	0.0635751	0.0628995	0.400801	2.48912	3.2623	3.28091	0.0745185	0.0316425	0.298459	0.512745	0.194514	1.94985	0.904299	0.389951	1.36253	1.78988	0.397313	0.303875	2.19419	0.385568	16.4757	0.0542923	0.176067	0.674013	0.12268	0.0978328	1.96023	0.190693	0.302196	5.39051	2.31947	0.0454691	0.345788	0.0265873	2.12608	0.00174555	1.71973	0.0553876	0.533826	0.128272	3.59657	0.941596	0.134764	0.0683659	0.0842091
CD300LB	0.272617	0.162928	0.0830209	0.276107	0.741718	0.198617	0.342371	0.303079	0.991294	0.372962	1.40802	0.100504	0.259522	0.546441	0.759168	0.303336	0.186307	1.52258	0.192179	0.513985	0.166953	0.103041	0.455161	0.410907	0.20207	0.0675036	0.0976328	0.659175	0.23409	0.168386	0.532996	0.541932	0.255093	0.188662	3.69028	0.0993994	0.0746354	0.138525	0.343809	0.0545677	0.133118	0.0996909	0.37642	0.333034	0.421697	0.51263	0.125461	0.295321	0.0879116
AL445426.1	0.0797418	0.347216	0	0	0.922063	0.0658424	0.130959	0.482267	0.199451	0	0.540765	0	0	0.498157	0	0.0808052	0.163487	0.191674	0.0203324	0.330495	0.043694	0	0.056583	0.145948	0.143544	0.0479524	0	0.0385624	0	0.116834	0.373014	0.140598	0.0422824	0.0312712	0.510474	0.0494271	0	0.0313102	0.158298	0	0	0	0	0.0447578	0.266276	0.152946	0.098505	0	0
SPN	0.274759	0.656075	0.531687	0.48943	8.08852	1.48561	0.715666	2.53946	5.21704	1.14806	1.01863	0.202703	1.61629	1.01343	3.05526	5.22518	1.30026	4.6479	1.63016	2.97465	0.990733	2.55464	1.70436	7.06553	0.850918	0.397962	0.382225	2.28881	0.589094	2.26533	2.28685	2.97961	0.786406	2.19899	8.05489	0.324132	0.788346	0.426891	0.835158	0.330839	0.56056	0.108264	1.01081	1.01651	6.21273	2.02486	2.34059	0.979335	0.33472
GIMAP5	0.0397783	0.199448	0.0588385	0.0471176	0.812705	0.304561	0.178166	0.207768	0.421234	0.157694	0.459487	0.0262424	0.0742238	0.213587	0.325766	0.461719	0.3361	0.421574	0.180723	0.361702	0.122852	0.511192	0.236071	1.12295	0.110663	0.021746	0.0770572	0.0454679	0.0965902	0.268448	0.487888	0.218909	0.145727	0.363038	1.05513	0.181559	0.112203	0.0511159	0.080401	0.0246102	0.0829075	0.00709909	0.0874556	0.0548025	0.537353	0.0855433	0.461601	0.0736053	0.0660806
AC104971.3	0.0875878	0	0.0431855	0	0.675192	0.289284	0	0.13243	0.500744	0.254633	0	0	0	0	0.483083	0.236682	0	0.210534	0.0893321	0.0968038	0.0479932	0.0535997	0.124301	0.427487	0.157668	0	0.133314	0	0	0.0855532	0.172512	0.205909	0.0928855	0	1.1214	0	0.203824	0.0687818	0.0695494	0.0541892	0.138489	0	0.124603	0.0491617	0.65807	0	0.216394	0	0
IGKJ5	1.14786	0	0.565957	0	3.40329	1.42168	0.94256	3.03717	24.1988	7.23023	1.63877	0	0.453081	1.30379	10.024	12.0194	0.784449	6.20798	0.29268	3.1716	0.314482	1.75609	5.70148	4.90204	0	0	0	0	2.13905	3.36359	1.97821	7.75818	3.65186	11.7037	6.18791	0	0.445194	0	0	0	0	3.3801	0.408239	0	39.767	2.93548	8.98037	0.556283	1.04877
IGHV7-56	0	0	0.0612717	0	0.184224	0.307827	0.102043	0.375784	6.61613	0.120425	0.0887084	0	0	0	12.8512	0.671612	0	0.522736	0	0.274691	0	0.0380237	0.132269	0.15163	0	0	0.0945731	0	0.0385964	0.0910374	0.673092	0.511254	0.131786	0.389865	0.628046	0	0	0.0487939	0.296031	0	0	0	0.13259	0	0.933671	0.0397252	0.818723	0	0
IGLV8-61	0.684835	2.33204	2.05193	0	20.6795	0	9.30038	13.1024	11.4445	15.9275	16.3956	0	0.58222	1.13688	53.8969	176.161	2.19608	30.3268	5.8027	9.05361	0.0288655	7.9949	0.261662	11.4093	0	0.126715	2.24508	0.356655	0.425399	6.3548	21.6593	3.12706	14.4693	3.01616	9.79752	1.01224	1.43021	1.36517	1.29674	1.2385	0.416471	0.89628	1.57379	0.147841	1.14341	9.39674	16.4423	4.9528	7.02726
IGHV4-55	0.118529	0.559115	2.8344	0	1.44085	0.244672	1.07062	1.61291	11.2657	3.84786	3.38442	0.0390979	0.187142	0.13463	6.91871	3.6033	0.0405015	6.62409	0.634671	1.40826	0.746894	1.88589	1.76622	1.30163	0.266707	0.0712771	0.270613	0	2.72419	1.70769	1.95518	4.38873	1.25698	11.574	2.71562	0.367345	0.0459711	0.0465399	0.65883	0.403326	0.281118	0.349032	0.379396	0.0332643	31.1689	0.757802	3.22122	0.229769	0.216594
TRAV21	0.127168	0.0461436	0.188102	0.0591766	5.09006	1.05002	0	1.58626	3.68058	0.18485	0.181555	0	0.301173	0.216665	1.87036	2.57728	0.738709	1.83404	0.713355	0.878431	1.18458	0.972764	0.676769	4.1895	0.343375	0.0764723	0.145168	0.122995	0.11849	0.43475	1.53412	1.00899	0.40458	0.598438	3.25632	0.118236	0.0493218	0.099864	0.353425	0.196692	0.0502679	0	0.407049	0.249822	2.38862	1.66672	0.785455	0.061629	0.11619
FCRL1	0.00554241	0.00402218	0.0054654	0	0.943236	1.199	0.0273067	0.0209498	0.637685	0.311513	0.0514329	0.025595	0.00875073	0.0062953	0.198696	1.05587	0.0340892	0.726061	0.0197847	0.0857581	0.00607386	0.033917	0.503395	1.22742	0	0	0	0.00536051	0.0103283	0.167823	0.122808	0.0879498	0.0411434	0.0434698	2.14002	0.0103062	0.0171968	0.0174096	0.0396087	0.010287	0.00438168	0	0.295675	0.00311087	0.513579	0.102761	0.136931	0.0805797	0.00675192
IL10RA	2.60793	2.00137	1.39259	1.83509	15.3559	3.0444	2.69669	5.3179	11.882	3.82474	3.45699	0.388925	3.37084	3.87772	7.25007	12.2111	2.15556	13.2338	3.29681	5.68921	3.42741	4.70423	4.53534	13.4173	2.20938	1.15768	0.46386	4.78375	2.15789	4.15286	4.62487	5.25987	2.38773	5.26379	28.4656	1.08386	1.55274	1.19008	2.78227	0.787166	1.08486	0.832579	2.74819	1.8246	12.0534	3.90965	8.08892	1.64319	1.28016
TRBV10-2	0	0.0801381	0.0272232	0	1.53881	0	0.0453383	0.208703	0.907519	0.160515	0	0.0728507	0.0435875	0	0.152263	0.372999	0	0.464507	0.140783	0.0305116	0.121016	0.135153	0.352605	0.505274	0.596343	0	0	0	0	0.431448	0.326244	0.129801	0.117106	0.476351	1.15338	0	0.0856575	0	0.0876851	0	0.0436504	0	0.117821	0	1.01404	0.0353001	0.136411	0	0.0336314
ABI3BP	0.156945	1.6032	0.537757	0.0369787	10.9051	1.76175	1.31974	2.03803	7.66505	1.48238	7.94158	0.718221	0.445404	2.06245	0.947793	1.70848	2.70449	6.05504	0.423477	3.90721	1.51964	0.94584	2.23152	3.65303	0.489936	0.463529	0.569984	1.04527	0.255447	1.77264	6.75851	4.23954	0.851148	0.682469	13.0845	3.71021	0.890712	0.641197	0.859738	0.379793	0.618811	0.0559005	1.59116	1.08608	3.27049	1.22568	1.12725	0.695126	0.278322
TRBV5-5	0	0.0452208	0.0921701	0	0.406451	0.0514511	0	0.0471072	0.667957	0.0603843	0	0	0.147575	0	0.286399	0.589339	0	0.14978	0.127107	0.103304	0.0682875	0.228794	0.221078	0.722301	0.280423	0	0	0	0.23224	0.152163	0.12273	0.402847	0	0.0488724	0.923766	0.0386238	0.0966706	0.0489334	0.148438	0.0385517	0	0	0.132969	0.0699501	0.676245	0.0398387	0.307898	0.181189	0
CCL11	0.62659	0.0586738	0.488328	0.13168	4.51859	0.30041	0.0995846	0.580654	2.80224	0.489678	6.3341	0.533383	0.797825	0.573957	1.69079	3.22252	0.911677	1.50613	0.371072	1.20632	1.4841	0.828733	0.960941	1.2578	0.800466	1.33702	0.64606	0.99701	0.213443	0.918052	0.636968	1.2117	1.62907	1.83894	4.79434	0.463557	2.38317	0.396818	4.04457	0.487702	0.846915	0.105813	1.23645	1.1345	2.56478	0.943354	0.149811	1.99829	0.590966
SLAMF1	0.173699	0.177959	0.22922	0.0427918	3.64437	0.776166	0.234922	0.548425	2.76372	0.475267	3.75624	0.0640366	0.318611	0.23211	2.00996	2.42624	0.590037	3.40767	0.586183	0.64368	0.53747	1.66008	1.01865	2.78329	0.404639	0.239627	0.0738707	0.0790578	0.310995	0.778456	0.945846	0.840713	0.330484	0.957643	4.255	0.0696657	0.491392	0.112332	0.430004	0.0821786	0.165593	0.0869197	0.432433	0.131904	4.14969	0.365818	1.64503	0.401087	0.211605
TRBV4-1	0.11694	0.0848647	0.0576578	0	3.64052	0.482785	0	0.17681	2.67421	0.283305	0.125215	0.0771475	0.0461584	0.398477	1.1287	0.631999	0.439544	2.67034	0.566528	0.516979	0.704844	0.500934	0.954251	2.35433	0.42101	0	0.133493	0	0.363199	0.14278	0.201534	0.24055	0.0620067	0.871318	1.77301	0	0.272129	0.045916	0.185714	0.108524	0	0	0.62385	0.164092	1.46434	0.897172	1.1075	0.566723	0.14246
IGKV3D-7	0	0.0412168	0	0	0.303106	0	0.0466371	0	0.405876	0	0.0405425	0	0	0	0.626498	0.690632	0	0.136518	0	0.28247	0	0	0	0.0346499	0	0	0	0	0.0352795	0.0554759	0.139829	0.233659	0.240922	0	0.153086	0	0	0	0.0901969	0	0.0449008	0	0	0	0.94826	0	0.280637	0	0.0345948
CD1E	0.069299	0.387958	0.229414	0	1.54392	0.662115	0.170713	0.942999	3.3888	0.278212	0.374545	0.293899	1.09414	0.258627	1.97476	3.7653	0.338278	2.27253	0.116115	2.88309	0.0922175	0.13934	0.99751	0.350305	1.31874	0.154784	0.128079	0.0861745	0.159887	3.59236	2.31059	2.29244	1.61679	0.481403	14.276	0.134999	0.261094	0.171034	0.526688	0.189871	0.219144	0	0.929517	0.650126	0.595041	0.765851	0.211974	0.98833	0.0361809
AC015660.2	0	0.239807	0.054309	0	0.130632	0	0	0.166541	0.787154	0	0	0.0726668	0	0	0	0.148823	0.150551	0.132381	0.0561709	0.243476	0	0.202217	0.156318	0.0671997	0.297418	0	0	0.106533	0	0.161384	0.16271	0.0647367	0.11681	0	4.45342	0.273097	0.0854412	0	0	0	0	0	0.0783489	0	0	0	0.0907108	0	0
DPT	5.62941	15.4639	4.72032	0.204567	36.4587	22.3133	10.6489	8.08682	19.5126	9.43125	67.6778	5.05111	6.96973	46.8254	8.29531	14.8655	2.85406	12.2545	1.20186	17.2211	11.3816	15.5358	11.5156	20.3532	18.6954	8.13629	2.9831	9.40118	23.5979	3.57829	52.7023	33.882	18.2464	10.5735	199.642	17.159	11.073	5.95502	5.62392	1.39011	35.372	0.679217	6.48839	6.84715	23.4871	17.8237	1.97106	5.40896	1.07852
PLEK	3.63928	1.66201	4.2831	3.28289	26.6767	6.27071	3.89623	7.0547	21.9488	5.41437	13.8349	1.92332	8.60334	8.06547	13.7928	21.011	6.06256	15.5418	10.7661	10.7538	9.32153	23.8293	5.86517	31.8064	6.56887	2.89685	1.48246	9.22288	3.94892	13.1423	9.48806	9.88221	5.06677	11.8302	49.1842	1.24006	2.85359	2.57882	6.07743	2.3615	1.514	0.805304	5.27557	4.9497	23.662	6.86659	41.1406	3.01071	2.58954
TRBV15	0	0	0	0	1.47449	0.342193	0.127615	0.274139	0.407226	0.150602	0.0369794	0.0341758	0.0817913	0.117682	0.190479	0.524946	0.212416	1.30746	0.237759	0.3149	0.0283855	0.538925	0.183794	0.568883	0.559514	0	0	0.100207	0.0965368	0.0759005	0.153048	0.395801	0	0.609454	1.11706	0.03211	0.0803675	0.0406809	0.16454	0	0	0.0338991	0.184241	0.0290766	0.605445	0.0662401	0.0853242	0	0.0315544
FCRLA	0.0799122	0.101488	0.0361175	0.00619774	2.15213	2.7548	0.0710877	0.226546	1.94166	1.60041	0.175887	0.0483262	0.0315427	0.0151279	1.18145	1.80851	0.0546121	1.84881	0.0441478	0.276002	0.113117	0.146708	0.893087	1.36102	0.0479502	0.00800916	0.0557476	0.0193224	0.0537757	0.445569	0.281998	0.461835	0.310734	0.360388	2.97964	0.0619159	0.0103312	0.010459	0.179788	0.0247202	0.0368529	0.0479349	0.322104	0.0112134	2.21259	0.332091	0.350988	0.271092	0.0162252
ABCD2	0.0594356	0.0482075	0.0689527	0.00976158	1.08013	0.138567	0.0976104	0.150655	0.742055	0.159237	0.668854	0.29062	0.0772808	0.448739	1.18912	0.307046	0.195924	0.344556	0.140851	0.204796	0.0900392	0.524182	0.111638	0.479921	0.0786695	0.0420487	0.0106429	0.0912997	0.076011	0.172457	0.302988	0.277399	0.144599	0.156301	1.12849	0.42475	0.0379678	0.0549108	0.0610759	0.0410979	0.0442242	0.210481	0.074606	0.0588711	0.709234	0.196703	1.09987	0.0508306	0.645267
IGKV1OR22-5	0.0616084	0.134129	0	0	0.0730651	0.0508698	0.0505894	0.1863	0.748464	0.119404	0.175913	0	0	0.419864	0.396428	0.24972	0	0.592349	0.0314176	0	0	0.0377015	0.0874319	0.0375863	0	0	0.0468858	0	0.688847	0.270798	0.182015	0.470713	0	0.483202	0.415149	0.0381873	0	0	0.0489204	0	0	0.0806302	0	0	0.462879	0.236331	1.1162	0.119428	0
IGHV3-63	0.127914	0	0.126137	0	0.417178	0.0528091	0.52518	0.725257	6.03316	0.929671	1.18703	0	0.15147	0.363226	1.46979	1.2962	0	0.999264	0.0326154	1.02496	0.14018	0.0782775	0.136148	0.156077	0.0575648	0	0.243366	0	0.357554	0.281121	0.692831	1.65392	0.203476	0.351136	0.991245	0	0.148833	0.0502249	0.152356	0.0791384	0.0505628	0	0.0909858	0	2.08228	0.245341	0.474037	0	0.0779144
AL034397.3	0.0841133	0.549376	0.0533216	0.246031	0.577154	0.357181	0.108537	0.109008	0.334898	0.174665	4.64906	0.0872001	0.151776	0.655127	0.430782	0.917291	0.197085	0.606546	0.0674051	0.670666	0.0724261	0.26472	0.494532	0.66711	0.151413	0.0289036	0.0182893	0.174327	0.194067	0.269952	0.449672	0.593224	0.12743	0.197913	2.37246	0.141514	0.0838877	0.103798	0.143122	0.0669079	0.123496	0.10222	0.17949	0.168612	0.451403	0.338025	0.267185	0.279521	0.0731924
IGHV3-19	0	0.380725	0.14781	0	0.488858	0.0618828	0.123083	0.339949	3.58845	1.37992	0.695492	0	0	0.170254	1.65344	1.26576	0.0512184	1.08089	0.0382194	0.538409	0	0.137591	0.159541	0.137171	0	0.180275	0.171109	0	0.0465544	0.183013	1.29162	3.56786	0	0.411469	1.06056	0.0464547	0.0581353	0	0.238045	0.046368	0.237002	0.0980862	0	0	2.0021	0.047916	1.17269	0	0.228254
TRBV12-4	0.161153	0.11695	0.0529713	0	1.94306	1.24192	0.308769	0.527925	1.34359	0.104111	0.191728	0	0	0	0.54317	1.7056	0.477239	1.48489	0.520481	0.623383	0.20604	1.11767	0.800455	0.589901	0.0966976	0.129212	0	0	0.133471	0.472228	0.502558	0.505138	0.569667	1.13755	2.96821	0	0.0416684	0	0.511856	0.199405	0	0.0351516	0.267467	0.150754	1.39016	0.377781	0.309668	0.156198	0
AC006369.1	0.278587	0.0288819	0.0196226	0	1.01478	0.0328611	0.13072	0.150433	0.796347	0.192833	0.0852281	0.0787665	0.188508	0.135613	0.548757	0.645262	0.326377	0.717467	0.0811814	0.109964	0.109036	0.365319	0.367119	0.631285	0	0	0.12115	0	0.0247214	0.0971841	0.372333	0.116951	0	0.655497	1.71635	0.0246685	0.123484	0.0312531	0.221213	0	0.0629267	0.0260429	0.141543	0.0446761	0.166119	0.254444	0.0327751	0.27002	0.0242416
IGLV5-48	0.059104	0	0.0291414	0	0.490665	0.439217	0.194132	0.0446816	6.88472	0.11455	0.126572	0	0	0	1.19527	0.798562	0.0807834	0.355169	0.0301405	0.195969	0.615328	0	0.251633	0.108175	0.0531968	0	0.0449799	0.0571642	0.0367136	0.548445	0.669361	0.10421	0.376073	0.23178	0.278791	0	0	0.0464137	0	0.0365667	0	0.193381	0.126123	0	1.48021	0	1.36288	0	0.0720022
IGLV10-54	17.089	9.66981	0.618676	0	14.0309	0.0986734	10.9905	62.3363	2.04962	9.09074	6.18468	0.591288	0.04717	0	21.1464	6.37778	0.530847	16.445	0.792241	4.29252	0.687552	0.76787	0.381587	4.37443	1.72095	1.50912	0.909457	0	0.148464	5.89473	2.61852	5.68903	1.20395	3.32734	4.14717	1.33331	0.370791	0.375379	0.854029	1.14599	0.708571	1.0166	0.722527	0.100613	12.2209	0.534821	0.688905	1.15829	2.00176
IGHG2	72.364	45.3845	55.7702	0.268961	207.252	132.196	36.3868	1034.11	348.736	79.9266	207.078	2.55476	14.2664	3.67641	679.504	801.972	30.2831	471.691	42.8466	253.658	37.4872	37.3037	105.184	71.6055	5.11549	32.2777	6.2021	9.78281	40.4625	168.211	59.0164	131.542	117.665	535.283	617.763	11.7031	4.55812	5.49203	115.013	12.7183	35.8699	65.6466	8.00321	80.4333	1887.87	92.5423	162.408	188.213	62.8897
IGKV1-6	2.00876	0.957966	5.82936	0	13.6132	10.9469	6.69217	8.28714	42.6145	13.1257	30.1534	0.530085	2.40133	2.4772	16.8825	23.3797	1.60812	51.7332	1.96096	9.86367	3.17627	19.879	49.888	8.43852	2.37622	0.897342	1.92182	0	6.80932	5.15751	13.1975	17.1017	3.71273	21.9219	25.3704	3.4863	0.489713	1.2169	5.28649	1.81092	0.725975	1.80272	2.12284	0.0322138	74.1679	6.75161	35.307	2.83704	1.81787
PTGER4	1.07367	3.1247	2.21796	0.486814	6.84336	1.59575	1.73616	1.88559	3.45867	1.08314	4.5239	0.392301	2.86444	4.05257	1.70567	4.0358	2.61892	4.4138	2.24908	4.02851	1.59901	4.98002	1.59794	6.00614	4.52953	0.721805	0.469308	2.49758	1.71009	2.93914	6.49863	4.02884	1.50064	1.9908	12.6705	1.94874	1.18306	0.942594	2.51832	0.70855	0.504938	0.817884	2.11097	1.10638	5.17562	1.48553	4.30768	0.965946	0.704299
IKZF1	1.72754	0.582361	0.616571	0.360975	9.24733	2.57861	0.843814	1.9059	6.44677	1.37815	1.85693	0.542639	1.44297	2.32427	3.94852	3.82793	1.78233	4.75525	1.70965	2.38356	1.70021	3.33931	1.82055	7.67408	0.963023	0.616608	0.259549	2.11497	0.634166	1.75926	2.49593	2.73022	0.91956	2.08047	7.93696	0.391014	0.75561	0.542648	1.01068	0.39856	0.447613	0.167746	1.02585	0.563018	6.14826	1.79282	3.55947	0.924712	2.43176
CLEC4D	0.0216685	0.00786253	0.0213675	0.080666	0.134914	0.0089458	0.017793	0.0491431	0.09291	0.010499	0.858462	0.00714755	0.0171059	0	0.229062	0.395235	0.0666373	0.11719	0.0386751	0.047897	0.00593657	0.742567	0.0384388	0.542004	0.0292543	0	0	0	0.114409	0.1217	0.0320086	0.0636754	0.183833	0	0.394237	0.013431	0	0	0.292501	0.013406	0.00856528	0.00708969	0.00770645	0.0182433	0.198979	0.0207803	0.249827	0.0315033	0.0329965
DOCK2	0.764766	0.745318	0.970206	0.451932	6.31376	1.81755	1.32682	2.704	5.48944	1.52155	2.11	0.207616	1.95278	4.49317	2.29097	3.89769	1.48005	4.53261	3.43147	3.12288	2.11657	2.369	1.46471	6.27601	0.886302	0.640996	0.248513	3.29905	1.00791	1.82288	2.09862	3.198	1.05684	2.40988	7.87374	0.38384	0.700843	0.741403	0.806104	0.608184	0.548424	0.140612	1.00733	0.928778	5.2487	1.78702	3.05987	0.642854	0.518391
HSD11B1-AS1	0.045722	0.132723	0.0225434	0.0425526	0.379571	0.226515	0.112633	0.20739	0.686161	0.0886143	1.04442	0.0603271	0.252661	0.36353	0.378263	0.957522	0.124986	0.384655	0.0699487	0.0757992	0	0.139899	0.551536	0.613673	2.18107	0	0.0695915	0.176886	0.0284011	0.267959	0.112567	0.322462	0.290924	0.215162	9.30457	1.67208	0.177331	0	0.726113	0.0282874	0.795224	0.149597	0.0650444	0.153978	1.14507	0.321549	1.24257	0	0.0835498
IGKV2OR22-4	0	0.21563	0.117201	0	0.70477	0.0490679	0.390379	0.584026	3.60976	0.518285	1.01809	0	0	0.0674986	2.45819	1.36495	0	0.571367	0.0303048	0.55827	0.293059	0.400026	0.16867	0.181275	0.32092	0	0.407025	0.114952	0.221482	0.986776	0.790054	2.34005	1.57551	3.16938	0.320355	0.0736693	0.0460964	0.14	0.0471875	0.147064	0	0.272209	0.04227	0	4.76249	0.265953	1.02773	0.0575988	0.144789
TRAJ2	0	0	0	0	0.587842	0	0	0.249811	1.18073	0	0	0	0.260865	0	0.303756	0.223235	0.451653	0	0.337026	0.182607	0.543196	0.808868	0.234477	2.21759	0	0.397424	0	0	0	0.322769	0.16271	0.19421	0	0	1.33603	0.204823	0.256324	0	0	0	0	0	0	0	0.551715	0	0	0	0
IGHV3-52	0	0.0896729	0.0304623	0	0.512905	0.153042	0.253663	0.88743	1.67778	0.778325	1.32309	0	0.146321	0	1.98775	1.50256	0.0422225	1.18806	0.09452	0.716979	0.0338536	0.113425	0.13152	0.452313	0.111216	0.148612	0.0470187	0	0	0.271565	1.03434	1.37983	0.0655198	0.484571	0.624488	0.114887	0	0	0.294354	0	0	0.0404293	0	0	7.22074	0.0790003	0.356162	0.299416	0.112899
AC098935.2	0.0468012	0.0339641	0.046151	0	0.555044	0.309148	0	0.0707619	0.133782	0	0	0.123502	0.073893	0	0.258128	0.252935	0.31984	0.393734	0.0477332	0.129314	0.0256444	0.114561	0.166046	0.285527	0	0	0.0356171	0	0	0.22857	0.0691344	0.0825185	0	0.146827	0.662279	0.0870278	0.0363034	0.220515	0	0.405372	0	0.0306256	0.0998696	0.0262688	0.23442	0.119687	0	0.0453621	0
IGHV1-67	0.244363	0	0.180726	0	1.12299	0.302654	0.150493	1.29314	2.27018	0.947205	1.17744	0	0.0964542	0	1.46007	8.74929	1.29423	4.25845	0.0934609	0.97902	0.0334743	0.972001	0.130046	0.186352	0	0.0734733	0.557902	0	0.0758954	2.80456	1.92518	3.51863	0.129571	1.10203	11.1972	0	0.0473876	0	0.242546	0.0377958	0	0.0399763	0.043454	0	6.62985	2.73403	1.05651	0.236849	0.223267
IGHV4-39	13.0343	6.07022	8.19772	0	111.037	10.8047	13.9055	70.1398	234.042	110.248	84.8383	2.50521	0.202554	3.38065	117.269	98.7316	3.15625	109.348	10.991	27.025	4.4427	15.733	110.731	47.1173	2.5403	2.53042	9.9195	1.0919	45.6784	28.6459	48.5903	52.9906	14.3669	197.657	44.5384	3.11716	2.70678	0.161192	3.99328	6.41319	0.811384	23.5732	10.2204	0.316833	24.8466	25.1968	133.078	3.33246	9.81484
CD52	5.90136	8.51456	5.12932	4.55882	60.0429	38.2499	5.07571	17.281	50.5575	16.0939	8.99134	2.26207	9.74099	3.68268	34.5639	49.4162	16.0044	73.5323	20.0788	17.1952	8.74226	32.5593	27.922	49.8496	20.8893	5.86317	4.15383	3.67728	9.08468	17.1903	26.9563	18.1232	11.2303	20.6545	127.142	6.7953	13.2082	2.5461	11.5576	1.44311	9.88413	3.78539	13.0078	4.25498	39.1782	13.8988	14.3302	18.0414	4.50391
IGHV3-7	0.912951	0.478499	0.600178	0	9.35352	0.586304	1.29109	3.18247	4.82068	3.48965	9.81167	0.066921	0.120119	0.345656	8.62527	5.65354	0.138647	4.8156	1.13805	3.72773	0.944908	0.527645	0.683799	1.1449	0.136951	0.427	0.733382	0.0490549	0.0945163	3.26972	3.92094	10.1351	2.36664	14.639	1.23039	0.408693	0.0786854	0.318636	0.604109	0.282414	0.0801949	0.630603	0.938	0.0284681	53.0108	1.16737	4.4693	0.0491599	0.432516
DCSTAMP	0.117761	0.19371	0.0580625	0.182664	0.642436	0.0518586	0.032233	0.373907	1.55408	0.121725	0.812602	0.0466134	0.0619765	0.0089172	0.144334	0.578095	0.616999	0.0660476	0.19217	0.347072	0.348443	0.297866	0.200546	0.12453	0.240247	0.0944204	0.322631	0.0607447	0.219449	0.207046	0.154628	0.14765	0.166512	0.21551	1.76694	0.0778593	0.0304488	0.209614	0.361567	0.0534284	0.148958	0.015412	0.56401	0.286423	0.491539	0.125482	0.116376	0.167406	0.0621661
SULT1B1	0.00296484	0.0408807	0.0175419	0	0.126583	0.0709936	0.0827751	0.0829306	0.0741569	0.0747006	0.215874	0.0997538	0.0234055	0.0505138	0.0190777	0.0981431	0.123597	0.124715	0.0650135	0.216269	0.048737	0.0308439	0.0420757	0.139278	0.0133426	0.128369	0.0157943	0.0315429	0.0239417	0.0188238	0.303655	0.0766702	0.0471625	0.00697608	0.227756	0.0845354	0.0183984	0.00465652	0.0423764	0.00917149	0.0164075	0.31818	0.0506136	0.0299541	0.801922	0.0265375	1.58219	0.0747155	0.0144474
FYB1	1.02611	1.50489	1.97612	1.06812	23.2234	5.22229	2.70685	5.40844	11.4772	3.00387	3.83083	0.778368	3.19221	6.17269	7.34543	7.75319	6.14751	8.1986	5.65391	6.80646	7.31712	14.3046	2.86423	17.0594	2.92835	2.236	0.647578	6.8364	2.08318	6.32622	5.97152	5.29945	2.18773	6.38226	15.0504	1.22108	1.92192	1.82778	2.09233	1.50636	0.780126	2.69755	3.29844	2.79944	13.8758	3.64361	26.6967	1.56288	1.42862
IGHV1-68	0	0	0.0364515	0.0688054	0.131517	0	0.121414	0.0558899	0.633993	0	0.052774	0	0	0	0.543673	0.49944	0	0.0888524	0.113103	0.081709	0	0	0.262296	0	0.0665411	0	0.056263	0	0	0.0361064	0.400433	0.521405	0	0.0579842	0	0	0	0	0.0587044	0	0.0584471	0	0	0	0.925759	0	0.365303	0	0
CCR4	0.1057	0.342626	0.201514	0.0590237	7.09095	1.09386	0.21988	1.54487	4.74871	0.894547	1.72031	0.199898	0.489532	0.768372	1.70359	4.92227	3.70808	2.01561	0.952275	1.82241	1.05024	2.30704	1.10503	3.28877	0.304433	0.694946	0.584535	0.640646	0.267007	0.942965	1.25258	3.87228	0.373643	1.75751	8.05803	0.519767	0.951089	0.547832	0.615495	0.257219	0.389962	0.0184446	1.0576	0.609097	3.44719	0.819944	1.48561	0.211729	0.356254
IGKV2-18	0.127168	0	0.0313504	0	0.0754083	0	0.208847	0.0480685	0.0908784	0.246467	0.181555	0	0	0	0.175346	0.171819	0	0.152836	0	0.105412	0	0	0	0.0775834	0	0	0	0	0.0394966	0.0310536	0.125235	0.11211	0	0	0	0	0	0	0	0	0	0.041608	0.0452276	0	0.212322	0.0406518	0.261818	0	0
GZMM	1.8463	0.954661	0.432403	0.343663	7.7732	1.1243	0.60643	0.802567	3.74386	1.29714	0.757824	0.0456762	0.692326	0.41942	4.87939	5.94016	0.110404	7.62767	0.764995	0.931006	0.594354	0.607293	2.89858	4.80126	2.43033	0.249809	0.175636	0.245534	0.401402	1.38637	1.90913	1.24788	0.416068	1.75579	13.6232	0.200271	1.10992	0.217482	0.842983	0.0428352	1.9705	0.135919	0.180575	0.272028	2.06149	1.46075	1.00732	0.827655	0.238979
TRAV10	0	0.0417606	0.397215	0.0535556	2.6957	0.285085	0.0945046	0.0870053	0.699093	0.0557639	0.0410774	0.151852	0.0454276	0	0.581866	0.583119	0.19663	0.829914	0.0880357	0.158998	0.126125	0.422575	0.204162	0.35107	0	0.207625	0	0	0.178725	0.168623	0.226678	0.338202	0.061025	0.451329	1.12452	0	0.13391	0	0	0	0	0	0.204658	0.0645977	1.249	0.0367904	0.331729	0.278875	0.0701024
TRAV26-2	0.0666953	0	0.131537	0.0620721	2.29384	0.16521	0.164299	0.201682	0.619613	0.193895	0.142829	0.044	0.263258	0.151511	0.306543	2.61328	0.0455796	0.561102	0.306106	0.479134	0.109636	0.571402	0.283953	0.528967	0.0600294	0	0	0.0645065	0.124287	0.260584	0.328406	0.274389	0.424376	0.15693	0.719084	0.0413404	0.10347	0.157126	0.105919	0.0412633	0	0	0.332084	0.14974	1.39194	0.0852817	0.878813	0.0646445	0.0406251
IGLV1-47	20.6841	2.41103	3.51394	0.0498712	23.3548	7.07927	10.6484	61.4534	174.084	29.1833	45.0984	1.09589	6.97989	4.26054	1086.68	127.063	1.68454	87.393	5.82052	27.628	6.04856	24.7579	8.70732	37.2032	1.9292	5.80024	7.05499	0.984714	0.732288	37.4499	19.2086	50.6101	28.1861	26.4355	64.2015	1.5943	1.41324	0.883686	5.48894	2.5859	0.720178	23.8794	3.96403	0.120307	461.114	11.1685	85.3466	3.0124	8.78012
TREML2	0.165123	0.0287594	0.0325657	0	0.332909	0.436291	0.0813536	0.0449387	0.269044	0.0512042	0.820379	0.0130721	0.0364989	0.067519	0.163929	0.638064	0.00451379	0.28577	0.0202093	0.0912483	0.0398102	0.0404189	0.164034	0.741436	0	0	0.00502652	0.0894338	0.0164111	0.122578	0.0715492	0.131983	0.0560351	0.0777045	1.10378	0.00818796	0.00512337	0.0311206	0.0419571	0.00408634	0.00522166	0.00864418	0.0657732	0.0407795	0.46316	0.0422276	0.152302	0.0448126	0.0523008
AC073072.1	0	0.0348107	0	0.0446428	0.170664	0.132023	0.0131295	0.0120876	0.239955	0.0464835	2.43113	0.0421936	0.0126225	0.0544838	0.411541	0.162025	0	0.538065	0.0163077	0.10603	0.00876122	0.0489235	0.0907651	0.0292644	0.201477	0	0.0121683	0.0154645	0.00993206	0.101516	0.496004	0.0845754	0.118694	0.0250812	0.398653	0.713577	0.0124028	0.0125562	0.0253927	0	0	0	0.0454929	0	0.146827	0.0102225	0.0526708	0.108483	0.0584358
IGLV2-5	0.0787342	0.0571381	0.0776403	0	0.280127	0.130021	0.323261	1.07139	0.28133	0.305192	0.449627	0	0.186466	0.268289	0.289501	0.744652	0	0.662384	0.200755	0.391583	0	0.144545	0.0558681	0.0960689	0.14173	0	0.0599191	0	0	0.230716	0.891676	0.601561	0.166993	0.308761	0.530552	0.19521	0	0	0.0625191	0	0	0.56674	0	0	0.262911	0	0.259361	0	0.0959163
AICDA	0.0140028	0.015243	0.0241645	0	0.0415169	0.0809344	0.0114983	0.00529294	0.0700479	0.0474933	0.0149936	0	0	0.0318099	0.0836671	0.212843	0	0.042073	0.00714083	0.00386904	0.00767275	0.0257072	0.00993609	0.132415	0	0	0	0.0406297	0.00869813	0.027355	0.00344747	0.00411489	0.0222746	0.00549128	0.523688	0	0.0217237	0	0.0166785	0	0	0.00458155	0.0348608	0	0.292241	0.0268576	0.0576589	0.00678611	0
PARP15	0.102968	0.135079	0.162069	0.350149	1.9562	1.25568	0.0943073	0.416155	1.80847	0.437504	0.228988	0.0496409	0.181331	0.13045	0.797257	1.47683	0.511523	0.923375	0.315055	0.639042	0.642326	1.01061	0.854283	2.08027	0.10337	0.100024	0.0421947	0.268123	0.179582	0.603455	0.46801	0.658699	0.155394	0.493872	3.95495	0.130102	0.150527	0.183489	0.261009	0.0833059	0.0563563	0.0803373	0.459167	0.131148	1.48113	0.465882	0.874065	0.188088	0.0820174
TESPA1	0.0911437	0.182683	0.160495	0.0848257	2.84387	1.16469	0.185323	0.682468	1.50739	0.399558	0.42445	0.0830353	0.229561	0.236628	1.08917	1.86184	0.566521	1.96651	0.471434	0.976158	0.271112	0.573693	0.957784	2.20568	0.382826	0.271435	0.19818	0.27705	0.113231	0.714331	1.03008	1.22694	0.280764	0.605921	3.89561	0.25826	0.552129	0.0886156	0.37565	0.0644447	0.312241	0.0397615	0.453815	0.0950068	1.82247	0.360729	0.993649	0.412258	0.200918
TRAV8-2	0.0385325	0.0279634	0.0949928	0	2.1478	0.668138	0.0949221	0.466078	2.45075	0.224041	0.220047	0.050841	0.212932	0.1313	1.31055	1.06727	1.10599	2.54705	0.255449	0.425868	0.401159	1.60345	0.902279	1.92766	0.138725	0.324399	0	0.0372679	0.0478704	0.884478	0.967637	0.679392	0.040863	0.664872	2.70038	0.023884	0.478229	0.0605183	0.275371	0.0953576	0.0609254	0	0.16445	0.108138	1.86569	0.344894	0.793319	0.186738	0.211236
IGHV4-28	0.359213	0.484128	1.46749	0	4.41227	0.593201	1.76979	1.12503	17.4926	11.4872	4.54229	0.135417	0.121532	0.408009	7.17008	11.8561	0.350695	10.2996	0.654226	2.5522	19.4017	1.53875	2.73096	3.78817	0.646622	0.370306	1.01538	0.198528	5.61019	7.16775	2.93108	5.18747	3.42846	14.8917	3.80374	0.318078	0.278639	0.282086	0.692712	0.507976	0.0811384	0.436541	0.730027	0	57.5757	0.853017	6.93073	0.198953	0.843951
PRDM1	0.825257	1.81657	2.15097	0.379245	7.34853	1.3402	1.83332	3.22554	7.63988	2.02087	6.16476	0.982695	2.03015	1.85138	3.99762	5.85036	3.01414	4.07844	4.33069	4.00979	2.56869	7.15827	1.67657	4.73393	1.73828	2.89522	2.58254	4.35848	1.83992	2.8213	3.8747	4.02911	3.66773	4.01784	7.55697	2.0928	2.1409	1.71025	1.00606	1.27325	1.01248	0.385414	2.99593	2.34485	9.73362	4.15088	6.26046	1.10855	1.9669
TRBV9	0.0559215	0.202914	0.220578	0.10409	4.6756	0.877308	0.0918391	0.211378	2.79743	0.270955	0.239513	0.0737847	0.662195	0.190554	1.38793	1.51113	0.267517	2.48673	1.82512	0.525347	0.582194	2.90881	0.515849	5.62927	0.150997	0.201769	0	0.108172	0.10421	1.03783	0.908674	0.953124	0.0593038	1.18422	2.97694	0.0693247	0.520534	0.0878291	0.355237	0.103793	0.13263	0	0.357994	0.125551	2.10076	0.178763	1.10528	0.487817	0.0681252
FP325317.1	0	0.0188308	0	0	0.0230801	0	0.0319607	0.0980816	0.0741732	0.0251452	0.463068	0	0.0307265	0	0	0	0.00886647	0.0623711	0	0.0716958	0.00710905	0	0.0092061	0.0158305	0.105096	0	0.0691154	0.0250965	0	0	0.0255535	0.0762514	0.0412763	0	0.883001	0.217129	0	0.0101884	0	0	0.0717985	0	0.00922848	0.247592	0.194955	0.0248844	0.0106846	0.0125751	0
AL022067.1	0.144115	0.0348618	0.0947417	0	0.170914	0	0	0.108948	0.240308	0	0.308623	0	0.037923	0.600202	0.353267	0.227168	0.361123	0.230938	0.0979899	0.0530928	0.0263223	0.146986	0.136348	0.146537	0.129711	0	0	0.139385	0.0298399	0.164228	0.0236539	0.0282332	0.254719	0	0.129483	0.0893281	0.111789	0.113172	0	0.0297205	0	0.0314351	0.170849	0.0269631	0.240616	0.153563	0.158244	0.139683	0.0292608
FCN1	0.319632	0.0953259	0.0863536	0.4075	2.65089	0.347071	0.50695	0.509752	2.13086	0.135777	6.77305	0.0866574	0.259241	0.164119	2.06476	3.28331	0.287259	4.95708	0.147368	1.12754	0.218325	0.318854	1.0377	2.22516	0.208868	0.100054	0.0599792	0.0719918	0.394371	1.27449	0.855919	1.59033	0.399327	0.236954	14.3393	0.0488516	0.129062	0.113467	1.01522	0.0243802	0.186923	0.117473	0.333246	0.19415	1.86416	0.221148	0.457943	0.407412	0.904119
EVI2A	1.6744	1.26863	2.53902	0.950683	14.4187	4.31285	3.11304	6.85454	9.99409	3.12272	5.38239	1.11853	3.63296	12.2126	6.7375	6.63042	4.80025	7.70777	3.99012	7.65257	6.59546	8.95769	3.39249	6.9194	3.55437	2.6344	1.31434	8.84078	1.75965	5.25111	6.76171	5.66932	2.54625	4.34448	19.8836	2.74152	2.74468	2.8448	2.37482	1.43336	2.5892	0.571964	3.37827	1.75551	7.14725	6.98861	5.46367	3.35811	1.0199
IGHV7-81	0.0538503	0.0781594	0	0	0.670575	0.177856	0.574845	0.977038	1.46236	0.939312	0.307523	0	0.127534	0	2.02954	0.6912	0	0.970795	0	0.267824	0.118028	0.0659077	0.229266	0.0985596	0	0.129531	0.0409817	0	0	0.262997	0.556831	7.24763	0.0571074	0.211177	0.616881	0.0333786	0	0	1.83868	0	0	0.0352384	0.0383039	0.120901	4.58536	0	1.90694	0.0521944	0.032801
IGLV1-41	0	0	0.0264857	0	0.286681	0.532253	0.13233	0.0406096	7.5625	0.156166	0.345111	0	0.12722	0.793192	1.97517	1.59673	0	8.84475	0.0821811	0.207794	0.176606	0.328727	0.228701	3.86713	0	0	0.613211	0.0519547	0	0.341054	2.7773	0.315711	0.3418	1.13755	0.253384	0	0.25001	0	0.0853094	0.0332342	0	0	0.764191	0	94.5308	0.377781	0.353906	0.0520659	0
CLEC9A	0.122267	0.277282	0.0188388	0.00711198	0.684236	0.290247	0.0878489	0.127094	0.431418	0.244372	0.278201	0.0655376	0.386087	0.624941	0.266931	0.242633	0.0574457	0.367365	0.0545571	0.320938	0.0293105	0.0607926	0.238585	0.587421	0.43331	0.0367624	0.0174467	0.532144	0.00474679	0.298567	0.530547	0.166174	0.00810388	0.131856	1.12256	0.0899958	0.112624	0.0120019	0.0849507	0.00472779	0.144991	0	0.0815333	0.0600482	0.223276	0.0928267	0.245434	0.155541	0.0186187
IGHV3-15	16.4194	8.2577	8.07104	0.0464475	135.185	9.97234	28.0309	45.0483	501.095	28.5824	65.4796	0.625566	0.590975	4.87504	72.2551	122.891	1.09141	59.0808	8.475	67.4309	6.45371	8.79574	25.7452	57.9415	3.23417	1.92073	7.71009	0.482691	29.6987	10.8707	25.3113	210.131	40.9644	39.3384	109.163	5.81566	1.00652	1.95957	7.01431	4.26098	0.907469	1.99214	5.96384	0.14006	386.463	9.76368	135.63	1.45117	22.1913
C1S	20.294	18.6195	29.7119	2.79241	97.7644	13.3875	14.7659	71.5607	84.2402	21.1901	81.0194	5.45952	31.0131	76.9342	126.508	151.199	20.8691	83.295	32.8974	75.8523	46.8803	54.2816	38.3797	205.804	11.5098	38.0582	19.2611	36.6445	19.1742	56.359	116.906	88.8106	125.084	31.553	174.029	16.627	36.5312	23.2888	26.3948	16.3391	25.572	8.21574	17.3928	36.523	290.37	52.1276	209.614	31.1291	47.4987
TRBV3-1	0	0.121437	0.0825052	0	5.06055	1.05929	0.183208	0.506011	2.11263	0.594577	0.159267	0.147192	0.308234	0	1.23056	2.63771	0.838619	3.68703	0.568893	0.277413	1.00859	2.08216	1.30611	2.27998	0.55224	0.268337	0.0424491	0.107896	0.0692958	0.626551	0.90635	1.21294	0.414065	1.18119	3.19484	0.0345737	0.346135	0.0438022	0.39862	0.0345092	0.0440969	0	0.753832	0.156538	1.72287	0.427935	1.46993	0.432506	0.37373
GLYAT	0.021011	0.0254131	0.0103595	0	0.0456833	0	0	0.0476518	0.335337	0.0610824	0.799914	0	0.0221157	0.0397752	0.006438	0.00473137	0.0287178	0.0336692	0.00714313	0.0309623	0.00383761	0	0	0.0427281	0.201717	0	0.01066	0.0474166	0	0.0273638	0.0206915	0.020581	0.0222818	0.00549305	1.93024	0.30388	0.0108654	0.0109998	0.0222451	0.0129991	0.177181	0.00916605	0.0199269	0.0471725	0.415115	0.0268662	0	0.0271532	0.0255962
TRAV20	0	0.11695	0.238371	0	1.97492	0.354836	0.0882199	0.162439	0.729378	0.104111	0.0766913	0	0.296846	0	0.246896	0.762076	0.110132	1.42033	0.191756	0.415589	0.235474	0.3616	0.49552	1.21257	0.290093	0	0	0	0.100103	0.944457	0.370306	0.536709	0.227867	0.0421314	1.44791	0.0332963	0.125005	0	0.170619	0.0664685	0.0424677	0	0.152838	0.0904527	0.58297	0.103031	0.26543	0	0.0327202
TRAV29DV5	0.0465019	0.0674937	0.137567	0	3.80531	0.575946	0.114554	0.316391	0.99695	0.0450629	0.132779	0.0920342	0.220261	0	0.812176	1.00527	0.222456	0.670656	0.426851	0.334066	0.280284	1.45131	0.527947	2.35471	0.251125	0.0559275	0	0.0899514	0.231085	0.454216	0.870101	0.409953	0.197258	0.620023	1.41009	0	0.216427	0.0730349	0.110775	0.11508	0.0367631	0	0.0661539	0.156605	1.3587	0.327034	0.765916	0.0901439	0.16995
EOMES	0.0715844	0.24676	0.158827	0.077726	5.08316	0.605846	0.09307	0.676457	2.35746	0.410435	0.17459	0.0472254	0.141278	0.453972	0.910272	1.08003	0.436211	1.01806	0.724015	0.985659	0.307256	2.24142	0.385193	3.10802	0.391948	0.0645705	0.0136195	0.207705	0.292735	0.748743	0.998692	0.631077	0.158154	1.1416	1.95763	0.025883	0.17121	0.35134	0.255788	0.0479788	0.410297	0.163951	0.161241	0.120538	1.1653	0.518688	0.977622	0.370044	0.167145
CCR5	1.06315	1.16808	1.73948	0.989452	14.4927	0.912165	1.38997	4.26556	10.6494	2.15259	3.64194	0.297791	2.42877	2.24648	5.17577	8.39391	2.02949	6.5957	3.77997	5.00528	4.53995	8.69764	2.30109	10.9974	2.82256	1.50722	0.402283	1.32697	1.88895	4.77455	3.9101	4.46461	2.2423	5.64123	11.0983	0.346057	1.32685	1.06808	2.4194	0.694498	1.07058	0.48971	1.0942	1.48015	16.5506	3.71372	11.1081	1.65794	1.18663
IGHV3OR16-11	0	0	0.0924342	0	0.481727	0.0515986	0.102628	0	0.401922	0.121115	0.133825	0	0	0	0.402107	0.506595	0	0.525731	0	0.0690663	0	0	0.0886846	0	0	0	0.0951151	0	0	0.0915591	0.184622	0.293819	0.132541	0.147037	0.252658	0	0	0	0.0496212	0	0	0.0408927	0	0	0.417343	0.0399529	0.205854	0	0
IGKV3-15	17.0725	5.90837	7.5175	0.229611	37.3053	6.68166	8.9138	82.1391	465.983	70.2412	31.665	1.00911	1.86973	3.75503	178.073	118.835	1.75347	77.2112	5.46027	16.7693	5.73182	18.4795	45.6211	74.8964	3.33082	3.32326	4.24327	0.572677	15.938	12.0973	20.6517	44.6885	37.8323	88.9323	90.6049	2.14091	1.56926	1.1237	35.3017	2.5643	0.975221	11.1718	6.00167	0.470818	296.66	20.1267	49.8187	7.03031	7.96464
IGKV7-3	0.951416	0	0.0360845	0	0.607568	0.0604292	0.0600961	0	0.418407	1.06382	0.0522427	0	0.0577754	0.0831275	0.201825	2.5215	0	0.615706	0.0373216	0.363989	0	0	0.103862	0.0446495	0	0	0	0	0	0.0357429	0.324329	4.04322	4.03584	0	0.641113	0	0	0	0	0.0905577	0	0.191564	0	0.0410781	1.58849	0.0467904	0.180813	0.354677	0.0445786
IGKV2D-40	0.0649089	0.141315	0.224025	0	3.19464	0.589544	0.586295	47.8432	3.47894	11.385	1.06569	0	0	0.147452	0.775664	4.47266	0.0887175	7.41098	16.8152	1.72172	0.142266	1.11219	2.16472	2.25719	0	0	0.592771	0.125557	0	1.96543	2.20531	3.24262	0.413009	1.47636	0.262434	0.281632	0.0503493	0	0.0515411	0.321264	0	0	0.0461699	0.0364323	20.8617	1.16196	3.63491	0.692042	0.197685
IGHV3OR16-8	0.062491	0.0453503	0.0616228	0	0.518783	0.206394	0.461827	0.425179	2.59017	0.242229	0.579909	0	0.394661	0.0709799	2.12542	2.87071	0	5.18221	0.127471	0.55253	0.0684832	0.114725	0.221711	0.190624	0.168736	0.150315	0	0	0.271723	0.427276	0.400016	1.8731	0.795249	7.79298	0.421097	0.0387344	0	0.0490736	0.0992424	0	0.0494037	0	0.13335	0	2.60839	0.0799057	0.411708	0	0.570963
TOMM20P2	0.310822	0	0.229878	0	2.54964	0.128322	0.0425383	0.234976	1.0736	0.0502008	0.0739588	0	0.0817913	0.353045	0.333338	1.04989	0.283222	0.56034	0.554771	0.372154	0.539325	0.982746	0.110276	2.27553	0.279757	0	0.0788484	0.0501036	0.128716	0.455403	0.484652	0.334909	0.384559	0.365673	0.977425	0.12844	0.160735	0.162724	0.0822699	0.0641002	0	0	0.294785	0.0290766	2.42178	0.231841	2.51706	0	0.315544
AC117402.1	0.096006	0.0812846	0.00788935	0	0.0664179	0.211391	0.0656956	0.20564	0.354479	0.0620235	0.0228442	0	0	0.0363492	0	0	0.437404	0.0192307	0.048959	0.0530539	0.184121	0.0195837	0.0567698	0.0488098	0.0864106	0	0.048709	0.123807	0.00993935	0.0312586	0.0709097	0.0658291	2.71501	0.276095	0.0323469	0.0198361	0.0992949	0.0628271	0.101645	0.158393	0.0379499	0.0104707	0.0455263	0.0449056	0.0400732	0.296671	0.882883	0.170599	2.59256
TPSD1	0.0284718	3.81218	0.0701905	0.0132491	0.675327	0.83457	0.596175	1.8726	0.203468	0.0137954	5.40623	0	4.20312	0.177867	0.143947	0.673201	0.291864	0.855465	4.63168	105.282	1.11547	0.261351	0.303044	0.0434254	1.64007	1.11289	0.108339	1.01888	1.55635	0.15991	2.888	6.35037	0	0	5.83247	0.635325	1.39138	0	0	0	4.0066	0.0372625	0.131638	0	0	1.05578	0	0.179376	0.0346851
FCRL3	0.0700515	0.0411538	0.0378286	0.0248364	3.16291	1.14581	0.0273916	0.232005	2.55311	0.530141	0.069055	0.0308095	0.0763681	0.0265225	0.735929	1.29577	0.259883	1.12255	0.0816532	0.324436	0.281485	0.657313	0.49707	1.95981	0.0510406	0.0521551	0.0152318	0.0677525	0.0849557	0.594639	0.294013	0.41759	0.102589	0.468317	3.26384	0.0186089	0.194066	0.0288152	0.30726	0.0144466	0.087027	0.0130972	0.341677	0.0149786	1.01643	0.174881	0.491736	0.174594	0.134104
CCL21	8.14311	21.3257	0.267666	0	22.5759	184.211	12.1911	3.90775	9.00729	12.6258	14.0351	0.249143	0.46583	0.643428	42.9598	53.7357	3.12931	55.288	5.66925	33.7954	1.39679	13.8085	15.8942	65.1165	7.37173	6.27362	19.3279	0.365257	1.56879	10.5822	79.3794	11.5694	0.725894	0.16661	59.151	4.18424	1.59287	4.37434	2.06164	0.481897	26.1428	0.0463362	13.3473	0.715398	4.98514	2.06739	5.67591	10.2262	0.0718854
TRAV34	0	0.0453503	0.0308114	0	0.592895	0.154796	0.0513141	0.0944843	0.267948	0	0.0892168	0	0	0	0.746771	0.211081	0.0427064	0	0.0956033	0.138133	0.0342416	0.382416	0.266054	0.571872	0.224981	0.0751575	0	0	0	0.274677	0.0923113	0.14691	0.132541	0	0.294768	0	0	0.0490736	0	0	0.0494037	0	0.0444501	0.0350753	0.260839	0.0799057	0.15439	0.0605695	0
ZNF831	0.00927664	0.0622723	0.0354475	0.010792	1.69564	0.224046	0.0723658	0.224415	0.886679	0.130349	0.130785	0.0382497	0.0695713	0.121173	0.407183	0.578121	0.207624	0.75535	0.13719	0.244784	0.155034	0.288101	0.225451	1.06682	0.0814074	0.0251031	0.0211794	0.0426179	0.0547425	0.212937	0.298048	0.362564	0.0737829	0.271023	1.31585	0.0287501	0.142117	0.0291394	0.0976014	0.0186527	0.0476701	0.00607041	0.143517	0.0468615	0.712465	0.13048	0.254017	0.0606919	0.0508548
IGHV4-31	0.509565	1.92294	6.08007	0.237121	11.5728	2.4824	6.1927	5.31607	41.1855	51.0092	20.3698	0.235318	0.0804536	2.77817	13.4902	28.1933	0.383061	20.0261	2.15681	5.15311	1.75904	4.45917	13.7399	20.0827	0.550363	0.674135	1.5124	0.147852	5.19104	16.4997	3.51272	22.6709	15.2929	37.5279	7.51983	0.0947546	0.948637	0.960374	0.647395	2.83733	0.443133	2.36748	1.63105	0.0858032	240.642	5.76638	19.0099	1.13596	2.42099
GPR174	0.0173365	0.10065	0.307722	0.0161348	9.10828	0.758679	0.227773	0.537351	2.92386	0.470403	0.0990037	0.125809	0.232663	1.02396	0.65339	1.61623	1.40989	2.00024	0.937135	0.958034	0.731458	3.72381	0.627383	4.22012	0.140434	0.0208505	0.0395809	0.100606	0.269224	0.71122	1.0756	1.14118	0.165466	1.19656	2.05608	0.085967	0.147926	0.136142	0.137661	0.0536292	0.0274116	0	0.382278	0.175153	2.63402	0.676118	1.89887	0.100821	0.105599
PPP1R16B	0.0681543	1.16479	0.194901	0.294949	5.20534	2.3157	1.1081	1.88061	4.94114	1.69737	2.182	0.307993	0.790909	1.48245	2.20214	4.09775	0.815092	3.92353	1.11218	2.44054	0.60125	1.49937	1.98279	7.52595	0.545948	0.454926	0.578322	0.533932	0.927146	1.65096	5.23688	3.31061	0.863704	1.39515	9.09103	1.95804	0.605324	0.647602	0.576358	0.263537	0.859401	0.30104	1.56343	0.810983	6.10774	1.29631	1.26006	0.498742	0.207569
FTH1P22	0	0.304371	0.0827168	0.0780676	2.81034	0.103892	0.275517	1.01462	1.94821	0.48772	0.0598782	0.110677	0.430427	0.476384	1.5807	1.27501	0.716564	1.61301	0.70581	0.78802	0.34472	1.95062	0.267844	2.58435	0.150997	0.201769	0.0319184	0	0.156315	0.553052	1.01193	0.468345	0.222389	0.953952	1.75225	0.0259968	0.585601	0.131744	0.199821	0.103793	0.165788	0	0.0596657	0.117704	1.01537	1.12621	0.794417	0.528469	0.0255469
SH2D1A	0.213643	0.284245	0.329179	0.115986	10.573	1.07312	0.336244	1.34592	5.87166	0.905765	0.482936	0.0998352	0.358396	0.414552	4.31235	3.68036	1.01594	3.01699	1.20297	0.969085	0.809694	3.82413	1.02327	5.13214	0.528798	0.256947	0.0270981	0.258289	0.34283	1.70857	1.71384	1.44397	0.556971	1.70355	5.65657	0.14346	0.545499	0.237676	0.650301	0.099133	0.246313	0.0349507	0.810479	0.219843	3.67848	0.910599	2.08198	0.440031	0.292799
IL21R	0.602381	0.0955368	0.424856	0.126233	2.73695	0.685137	0.144134	0.998238	2.70262	0.444571	0.267683	0.0421087	0.629854	0.666084	2.3616	3.73794	0.29989	1.27533	0.691682	1.10667	1.17164	1.52578	0.651062	6.65156	0.19389	0.522968	0.0819709	0.617336	0.547642	1.30926	0.553935	1.79595	0.499206	1.93362	4.10485	0.0271998	0.448695	0.338336	0.690558	0.227065	0.529841	0.0704832	0.192956	0.33139	4.60243	1.41807	3.57112	0.355728	0.34019
IGHV1OR16-1	0	0	0	0	0.230938	0.0459385	0.0913706	0	0.437353	0.161744	0.397151	0	0.0439211	0	0.204571	0.714123	0	0.133732	0	0.0614902	0.0304855	0.0340467	0	0.101828	0	0	0	0	0	0	0.301346	0.621274	0.0590012	0.479997	0.562358	0	0	0	0	0	0	0.072814	0.0395742	0	1.57914	0	0.229091	0	0
GAB3	0.239936	0.516368	0.393658	0.354207	2.18567	0.625085	0.475571	0.885047	1.79743	0.537182	0.933155	0.180123	0.718466	1.30626	1.15983	1.31629	0.78311	1.7998	0.683513	1.33506	0.716293	1.29868	0.774947	1.94334	0.409571	0.268668	0.217229	1.28834	0.413718	1.16171	1.69883	1.3664	0.38606	0.730027	3.72704	0.425653	0.336935	0.344353	0.377759	0.302008	0.369563	0.151594	0.597336	0.517792	1.52642	0.952139	1.29118	0.485165	0.151188
TFEC	0.461721	0.18127	0.573486	0.443804	3.26455	0.670817	0.441293	1.34471	2.81097	0.606358	0.623166	0.0765674	0.740947	3.25268	1.62814	1.92946	1.66047	1.12499	1.43333	1.39566	2.06545	3.5898	0.773415	3.21248	0.556369	0.543171	0.209294	1.80335	0.456071	1.65488	0.960337	1.55256	0.59935	1.61674	4.02431	0.214254	0.297483	0.497316	0.99371	0.346537	0.205451	0.138687	0.757348	0.631606	2.57597	0.938818	3.40348	0.286121	0.30122
BTLA	0.0412945	0.0470922	0.0494466	0.0329417	2.28427	0.711159	0.10657	0.160549	1.29845	0.194367	0.181076	0.0778362	0.0791696	0.140712	0.786299	1.02819	0.42331	0.872061	0.38206	0.290136	0.155157	0.87724	0.389293	1.65914	0.27079	0.0567595	0.0179579	0.028528	0.109932	0.420639	0.35438	0.395249	0.12512	0.434921	1.98362	0.0511919	0.146431	0.0463259	0.182687	0.0255482	0.0606288	0.0038603	0.239179	0.0529781	1.26565	0.120691	1.01536	0.211559	0.097019
NUGGC	0.0550881	0.0359802	0.0787679	0	1.03225	0.136458	0.0723764	0.262368	1.36212	0.197519	0.200552	0.0399768	0.0608838	0.725827	0.627922	0.666151	0.0828239	0.390623	0.193839	0.340953	0.0633889	0.242722	0.101632	0.467156	0.0743734	0.0728795	0.0125771	0.0266401	0.181361	0.220614	0.431291	0.349666	0.245364	0.267879	0.920606	0.0785353	0.0726434	0.0259561	0.0656143	0.0340821	0.039196	0.0576773	0.0431028	0.0525641	1.84871	0.130314	0.453669	0.0266971	0.0603989
TRBV7-4	0	0	0.030989	0.0584945	0.447234	0	0.15483	0	0.269493	0.0609064	0	0	0	0.142778	0.34665	0.169838	0.0859051	0.604299	0.128206	0.173661	0.172195	0	0.222989	0.498479	0	0	0.143495	0.0607885	0.117124	0.153478	0.0928433	0.775721	0.133305	0.0985899	0.719991	0	0.195013	0.0493564	0.0998144	0	0.099377	0	0.0447063	0	0.419749	0.0401831	0.31056	0.0609186	0
IGKV1-12	0.328784	0.079534	1.67512	0	17.7091	1.49312	0.584955	6.33816	2.81951	2.8675	3.63783	0.0723016	1.42755	0.435688	4.98679	2.3692	0.112346	5.59793	0.950108	1.63521	0.180155	0.503002	0.272181	2.57419	0.0986413	0.0659045	1.00086	0	2.72308	1.04373	3.42673	4.83085	0.9879	13.3662	0.184627	0.135862	0	0	0.913754	0.169511	0.0433214	16.8892	0.311821	0	23.1013	1.15612	7.26553	0	0.934582
AL365361.1	0.0877137	0.200057	0.148277	0.0174929	5.64706	1.19501	0.252089	0.866767	3.77441	0.558568	0.612715	0.0867993	0.276977	0.711634	2.10212	1.92581	0.937689	2.26649	0.514397	0.824014	0.429126	1.37642	0.631288	1.24226	0.197368	0.248661	0.090593	0.17573	0.299668	0.510997	1.22166	1.27037	0.365431	0.766571	2.65555	3.82521	0.252716	0.196802	0.293522	0.14342	0.0990629	0.0532979	0.650649	0.137147	3.55136	0.480674	1.48082	0.255049	0.167916
IGKV2-30	0.223686	1.05515	1.9852	0	4.90773	0.554089	1.79086	1.14144	28.6936	2.54698	14.0514	0.110677	0.0882926	1.39739	4.2152	11.5979	0.152867	4.03253	0.484799	1.51423	0.275776	0.342213	0.555529	3.44579	0.251662	0.201769	1.40441	0.0540862	0.10421	4.06937	6.14044	3.68103	0.533734	4.29827	2.29865	0.623922	0.0433779	0.307402	1.55416	0.345977	0.17684	4.86696	1.82975	0	158.024	0.286021	9.07248	0.542019	0.579064
TRAV5	0.185875	0.0449638	0.0610976	0	1.76353	0.358112	0	1.03047	1.23977	0.900619	0	0.1635	0.440209	0.070375	0.227817	1.25569	0.211712	1.48929	0.347558	0.171194	0.237648	1.59246	0.0879287	1.85219	0.501893	0	0.0943044	0.299625	0.192434	0.211817	0.67118	0.218486	0	0.631732	2.42155	0	0.288364	0.0973106	0.0491983	0.0383327	0	0.0405441	0.132214	0.139105	1.70687	0.475348	0.459224	0.300266	0.226439
IGKV1D-42	0	0.0424324	0	0	0.589418	0.193114	0.240062	0.132607	0.961046	3.96626	0.45912	0	0.0461584	0.0664128	1.02121	0.631999	0	0.70272	0.477077	0.161556	0.0640767	1.28812	0.0829783	0.107015	0.105253	0	0.0444975	0	0.0363199	1.28502	1.5259	1.54639	0.37204	0.275153	0.512203	0.108726	0	0	0.232142	0.0723491	0	0	0.08318	0	0.292867	0.822408	0.481521	0	0.0356151
SLCO2B1	2.2945	3.7676	2.31457	2.56882	8.47092	4.73727	6.50531	9.64625	5.87982	4.06315	5.43861	0.397543	7.62301	6.16488	2.85099	6.75824	4.46085	6.53324	6.17391	9.03294	6.24589	5.18844	3.0619	11.0972	1.66314	1.58378	1.02622	10.827	2.99976	2.98004	7.65655	7.70608	2.92709	6.22508	14.7147	1.46402	1.96451	2.8277	1.88721	1.65812	1.78066	0.485323	3.1173	2.76259	8.29155	5.11888	7.67292	1.15997	1.4066
IGLV1-36	9.37859	0.0805459	0.273618	0	5.62713	1.0539	2.46073	1.04882	245.127	12.6377	8.20011	0.878657	0.0438093	0.756397	3.62189	15.6332	0.644726	5.86923	1.33009	2.20801	0.182448	1.46028	8.89937	14.6598	0.0998962	0.066743	2.44952	0.214693	0.310244	1.11121	4.86392	10.4696	15.007	33.6013	3.14119	0.481569	0	0.130738	1.49823	0.48067	0.570343	0.326829	0.315788	0	3237.72	0.674116	107.856	1.18334	1.18309
CCL19	2.63846	7.37384	0.124554	0	90.511	36.2707	5.1398	11.4585	63.7267	31.3074	7.55375	4.33307	1.4403	2.32735	38.5993	91.0366	6.40684	94.3883	1.78923	10.501	0.230701	2.97157	50.0911	114.39	16.6485	0.978983	3.93044	0.488655	0.261531	27.1425	85.2752	30.7497	3.48267	3.83054	188.044	2.67931	7.9688	1.49886	27.08	0.173656	3.77236	0.0918374	16.3915	3.07213	59.0484	3.73264	6.68038	30.171	1.12841
SLC9A9	3.21244	0.662213	0.649874	0.203621	4.38256	1.5818	1.41096	1.76292	2.91349	1.21005	2.37315	0.827302	0.95627	3.23666	1.46178	1.85655	1.28003	3.26441	1.05313	2.15858	1.80994	2.17812	1.42373	3.78624	0.912558	0.82791	0.698504	1.50706	0.480637	1.68879	3.20301	2.28633	1.01863	1.46904	5.18164	0.833525	0.724379	0.892582	1.00848	0.49522	0.738276	0.251419	1.24879	0.781739	3.16288	1.17021	3.19927	0.858584	0.783348
IGHV3-60	0	0	0.121505	0	0.438391	0	0.252947	0.139725	1.18874	0.358212	0.439783	0	0.0486358	0.139955	1.35918	1.29022	0	1.03661	0.094253	0.272363	0	0.0377015	0.043716	0.187931	0.0554509	0	0.0937716	0	0.0382693	0.0902659	0.424701	1.05005	0.0653347	3.23745	0.290604	0.114562	0	0	0.0978407	0.0762322	0	0	0.0876445	0	1.38864	0	1.31915	0	0.0750532
TRAV22	0	0.0341105	0.13905	0	1.14274	0.271671	0	0.213201	0.604616	0.0455485	0	0	0.0371057	0.213552	0.432067	0.762076	0.0321219	0.903844	0.143817	0.233769	0.489345	0.517745	0.133409	1.23306	0.0423052	0	0.107312	0.0454604	0.0291968	0.114778	0.347162	0.52487	0.0996917	0.184325	1.26692	0	0.10938	0.0369109	0.26126	0	0	0	0.0334334	0.026382	1.56953	0	0.270959	0.0911153	0
CR2	0.218763	0.0842393	0.00440253	0.00415508	0.656554	5.39315	0.0366604	0.0708777	0.886963	5.42965	0.0350566	0.465365	0.00704895	0.0202841	0.566349	3.85755	0.0579706	0.515108	0.0478114	0.103621	0.00489266	0.0464457	0.519544	1.1467	0.0241101	0.0161085	0.0339766	0.00863607	0.144209	0.508039	0.0879335	0.0655981	0.771738	0.115553	2.32854	0.0110692	0.0207787	0.420717	0.322604	0.0055243	0.00352956	0.341816	0.790738	0.00501178	11.0283	0.790658	0.562537	0.0216364	0.231152
DNASE1L3	0.0415681	0.537966	0.0614858	0	0.624442	0.760817	0.227556	0.240923	0.807008	0.268545	0.791275	0.0411347	0.13673	0.645268	0.305686	0.627156	0.0852229	0.832639	0.0529948	1.13323	0.0417578	0.0932716	0.30479	0.77348	0.823097	0.0333291	0.147628	0.10051	0.00430347	0.372189	1.28607	0.228018	0.0661233	0.157578	3.13253	0.176065	0.139724	0.0544049	0.0990218	0.0214312	0.251947	0.0272012	0.26118	0.0505516	0.63619	0.168315	0.154047	0.308889	0.0801791
IGKV1D-16	0.288484	0.251227	0.312923	0	3.76343	6.57431	1.42132	0.610649	9.15348	0.726849	2.38879	0	0.0455478	0.262137	4.82635	3.74184	0.27601	3.18975	0.20596	3.47533	0.158073	0.388385	0.450344	0.281599	0.571232	0.0693915	0.43909	0	0.107519	4.84666	1.1648	1.83112	0.122373	3.52968	2.25499	0.143051	0	0.0906173	0.503957	0.17848	0.0456135	0.415309	0.533519	0	13.6309	4.86918	3.37358	0.167768	0.632591
AC015911.3	0.0770649	0.205065	0.0886599	0.167353	3.35118	0.339371	0.105469	0.407818	1.41354	0.174254	0.128361	0.101682	0.182513	0.320956	1.08622	1.19742	0.438885	1.08057	0.510898	0.58202	0.394121	1.93356	0.437469	1.64556	0.161846	0.0926855	0	0.0496905	0.191482	0.777839	0.720985	0.588807	0.217936	0.926792	2.42341	0.0636905	0.239115	0.0201728	0.28557	0.0317859	0.0609254	0.134479	0.310627	0.144184	2.12303	0.147812	2.09436	0.224086	0.125177
IGHV1-14	0.180991	0.0656733	0.044619	0	0.482957	0.0747216	0.0743097	2.25763	1.74611	1.05234	0.258396	0	0	0	0.415932	0.427943	0	0.435045	0.138446	0.150026	0	0.166137	0	0.0552097	0	0	0	0	0	0.0883931	0.802074	0.531862	0.0959688	0.851719	0.121961	0	0	0	0	0	0	0	0.0643696	0	7.17687	0	0	0	0
IGLV2-11	4.90711	6.44961	7.07022	0.101488	103.913	21.0242	18.8936	265.202	70.3692	64.1961	95.5896	0.03597	2.28126	3.83966	128.156	149.434	2.86912	147.44	6.58969	23.381	11.8009	33.9664	16.1332	18.3617	5.25092	4.85255	21.2034	0.210936	92.4944	13.261	41.1031	40.2481	15.4961	119.267	26.9309	5.88047	2.11467	3.0828	6.27771	3.23834	1.33625	51.4132	4.07218	0.122413	805.05	8.26155	108.887	5.12615	47.2593
BLK	0.0272447	0.0626105	0.00447769	0.0126781	1.16858	1.85965	0.104402	0.0755206	1.03839	0.435627	0.0972413	0.0179738	0.0179232	0.00515761	0.517581	2.12275	0.0372381	1.5335	0.0254716	0.110408	0.0298571	0.0444599	0.873173	1.08871	0.0245217	0.0109223	0.0172784	0.00439176	0.0169236	0.177412	0.198992	0.221504	0.0481542	0.10328	3.01392	0.00844367	0.00352225	0.0713166	0.0901406	0.00842792	0.00358982	0.00891414	0.174413	0.00254867	0.598926	0.15967	0.1421	0.123232	0.038722
IGHV4-34	8.88732	0.989204	5.96802	0.101488	25.5094	7.7434	3.40264	106.509	52.2509	14.0016	19.5383	0.46761	1.03302	2.91071	251.351	59.9284	0.260829	73.13	7.11798	9.61153	13.3843	12.2453	13.5023	23.2514	0.147222	1.70495	1.95022	0.949212	16.6632	10.6247	9.58445	26.1805	15.5539	91.086	44.9706	0.337958	0.930455	0.7707	33.3368	0.775853	0.560362	1.32012	4.30488	0.367238	89.4854	4.3225	111.357	0.264234	10.9596
NLRP3	0.389699	0.991492	0.474704	0.32855	1.9112	0.484551	0.726585	0.869953	1.64473	0.813037	7.06908	0.0877134	1.00979	2.20797	1.01567	1.19862	0.444912	1.57037	0.448895	1.47959	0.68833	0.802406	0.725463	1.43768	1.54743	0.286727	0.223301	1.79143	0.293331	0.900116	1.53961	1.63558	0.525095	0.67242	4.86581	0.346696	0.284505	0.244821	0.491466	0.363069	0.347955	0.108004	0.47286	0.514663	1.11375	1.43041	1.6273	0.337722	0.27926
TRBV2	0.0518037	0.187972	0.025542	0	5.65222	0.684386	0.170153	1.01823	3.66504	0.200803	0.184897	0.0683516	0.327165	0.0588408	1.61907	1.32986	0.885068	2.30362	0.554771	0.715681	0.51094	0.570626	1.2498	2.0859	0.559514	0.062304	0.0394242	0.150311	0.193074	0.328902	1.17337	0.791602	0.109874	1.54395	3.037	0.06422	0.200919	0.122043	0.370214	0.160251	0.204773	0	0.515874	0.116306	2.55152	0.331201	1.19454	0.251054	0.504871
IGKV1D-33	0.0455311	0.0330423	0	0	0.080997	0.0375948	0	0.0344207	0.195227	1.50015	0.0325017	0	0.0359438	0.051716	0.376683	0.153794	0	0.766097	0.0232189	0.0251609	0	0.0278629	0.0646157	0.0555555	0	0	0.069301	0	0.735346	0.0222367	0.179355	0.267596	0	0.249974	0.122725	0	0	0	0.0361541	0.0281693	0	0.0595889	0	0	0.570144	0.145548	0.262474	0	0
UBASH3A	0.275175	0.281624	0.285267	0.0591	3.57307	0.792324	0.278102	0.597412	1.92615	0.376059	0.21154	0.0465481	0.417755	0.240427	1.54364	2.89808	0.284493	2.51006	0.500141	0.772019	0.436876	0.90242	0.901191	3.03905	0.488994	0.203662	0.0429572	0.0955388	0.223524	0.816686	0.89288	0.829367	0.284336	0.929699	3.26637	0.0699751	0.410483	0.0886531	0.414596	0.0654793	0.217546	0.0138514	0.306146	0.13465	2.6447	0.415013	1.30159	0.321424	0.1934
IGLV4-60	2.16889	0.612104	0.504984	0	4.64428	2.43753	0.74207	0.546547	14.5524	10.0418	6.23593	0.238475	0.332927	0.136862	15.0083	12.4136	0.247037	8.68888	0.153617	1.19855	0.264095	4.60853	2.69324	0.220534	0.488029	0	2.98023	0.116539	0	1.17695	11.2135	3.39921	3.57789	1.79559	0.16239	0.373434	0	0.0946225	2.53548	0.149095	0.142889	0	1.37132	0.101447	72.4743	0.770362	75.9114	0.233577	1.13762
TLR4	1.00831	2.33675	2.07658	1.03496	10.3194	1.59316	2.67471	4.12188	4.51616	2.58552	8.08925	2.20364	2.50591	11.4858	1.94148	2.54248	5.58353	4.73263	4.65738	7.09916	8.97637	7.38923	1.93149	6.07559	1.68809	1.9413	1.36103	4.53497	2.78112	2.80673	7.11226	5.57977	2.81625	4.029	7.73959	2.8266	1.2746	2.83164	1.57495	1.22968	0.577354	0.176493	3.14039	2.10309	6.22821	3.75383	5.31715	1.26688	0.879561
GIMAP8	0.495194	2.72741	1.45466	0.572446	10.0054	2.07452	4.09621	2.5811	3.79584	3.08633	5.57394	1.16576	1.58838	3.00177	3.17681	4.91233	1.58877	7.46751	2.90274	6.61942	2.60199	3.21855	2.85171	8.02658	2.54753	2.09389	1.55106	1.85527	1.26278	4.3303	14.6607	4.16642	2.05636	3.58951	9.65234	4.27132	2.64839	1.62098	1.43211	0.532113	1.77611	0.45366	1.58319	1.28732	5.20437	2.47278	5.46034	2.13206	1.01919
CNR2	0.004151	0.021087	0.0143267	0	0.649826	0.634081	0.0204514	0.034519	0.296644	0.269511	0.0592628	0.00821546	0.00655389	0.00942976	0.190787	0.558044	0.028368	0.52383	0.00846734	0.0711104	0.00227452	0.0279424	0.200291	0.379869	0.00747225	0.00998477	0.0126362	0.0160591	0.00773544	0.0932553	0.0960653	0.0561117	0.0132062	0.0683693	0.841946	0.0128648	0.0064398	0.00325974	0.056034	0.00256816	0.00328167	0.00543264	0.0885787	0.0116495	0.311875	0.0769629	0.0888807	0.0563271	0.00252844
PNOC	0.112842	0.0670016	0.0354056	0.0190946	0.371065	0.415046	0.109507	0.395514	1.11431	0.357875	0.168425	0.0203029	0.0647867	0.0349558	1.48049	1.12961	0.0280424	1.02331	0.245873	0.158729	0.129284	0.0690543	0.480423	0.406802	0.0184662	0.111039	0.0156139	0.0396869	0.267633	0.150302	0.16669	0.301455	0.348124	0.450564	1.54152	0.00635857	0.00795737	0.0241675	0.089603	0.0253868	0.0405501	0.0738415	0.0656715	0.0345473	2.42355	0.216433	0.321029	0.0596578	0.0249942
CASS4	0.0989575	0.287258	0.18668	0.112119	1.26544	0.34815	0.339165	0.591976	0.891663	0.362735	0.890672	0.0823146	0.380413	0.840557	0.569521	0.889415	0.320496	0.925597	0.267679	0.596778	0.4385	0.516054	0.344985	0.855713	0.615725	0.108666	0.104779	0.794808	0.122939	0.603066	0.519042	0.584125	0.292015	0.371195	1.90191	0.218683	0.153521	0.155421	0.2289	0.106475	0.136058	0.0563091	0.373367	0.236663	0.721942	0.528144	0.694477	0.20851	0.133657
RGS13	0.125193	0.0374104	0.010893	0.00685382	0.231445	0.106412	0.0241886	0.100211	0.0605217	0.0856371	0.278616	0.0728753	0.00581363	0.242576	0.152314	0.124375	0.103172	0.146037	0.0694763	0.19127	0.0282465	0.0608392	0.0365788	0.0786247	0.0397696	0.106284	0.103682	0.142452	0.0205852	0.0449577	0.255644	0.341925	0.0195243	0.0519832	0.409402	0.148352	0.131386	0.0144578	0.0146191	0.0113904	0.0931523	0.0313237	0.041906	0.0103337	0.252058	0.0494369	0.0697446	0.00713785	0.0224285
AL133371.2	0.296726	0.592177	0.219453	0.138079	1.05572	1.28628	0.609137	0.841199	1.2723	0.862633	1.90633	0.489388	1.46404	0.758326	2.7958	0.751708	0.253479	2.22887	0.264806	2.17265	0.365826	0.771726	0.473738	1.49348	0.600906	0.267653	0.225817	2.08066	0.184317	0.326062	0.840116	0.741169	0.393342	0.639996	2.84928	0.0919613	0.345252	0.233016	0.353425	0.458949	0.469167	0	0.527656	0.124911	1.23854	1.0434	0.794182	0.934707	0.18074
IGHV5-51	6.59601	2.85663	17.1789	0	249.503	12.5177	13.2786	115.533	114.155	62.6303	81.335	1.4388	19.6946	4.16894	199.746	182.623	2.47197	136.172	9.57564	83.7178	11.7463	44.5311	44.1994	102.777	3.30352	7.80502	12.0231	0.463031	4.59288	26.7324	39.0005	108.358	40.3902	194.417	71.1157	2.11018	1.36164	2.75698	7.22279	5.19978	0.883122	30.9101	6.05388	1.16441	2091.14	76.7916	175.928	3.66061	13.5436
CD200R1	0.16755	0.137805	0.267109	0.0623741	1.70557	0.544157	0.270579	0.519325	1.30113	0.270608	0.215285	0.412665	0.268948	1.12283	0.718747	0.675363	0.656487	0.859172	0.546836	0.996881	0.373352	0.939882	0.352706	0.994935	0.251339	0.100755	0.0552544	0.340307	0.451	0.373684	0.704008	0.971598	0.118456	0.617632	1.78388	0.190399	0.177621	0.293851	0.137478	0.0621961	0.0662301	0.0292375	0.413152	0.141065	0.885852	0.339216	0.551931	0.135331	0.0884493
HSPE1P18	0	0.28263	0	0	0.554251	0	0	0	0.278315	0	0	0	0	0.265414	0.0715997	0.0526196	0.159691	0.561674	0.0794418	0.258259	0	0.0953308	0.110539	0.332639	0	0	0	0	0	0.0760812	0.306825	0.22889	0	0	0.734814	0	0	0	0.0618493	0	0	0	0.0554038	0	0.520188	0.0995968	0	0.150991	0
SCML4	0.0459725	0.0978639	0.0498672	0.0228191	1.34123	0.298613	0.0427834	0.250232	0.418333	0.07722	0.063446	0.0181973	0.0580677	0.0800668	0.371884	0.56938	0.161277	0.585669	0.13285	0.132105	0.137707	0.330094	0.254445	0.631995	0.151719	0.0700351	0.016327	0.00889275	0.0304606	0.155669	0.267114	0.145903	0.061754	0.182688	0.871533	0.0189971	0.104604	0.0168475	0.0924785	0.0132731	0.109034	0.01805	0.113361	0.0326847	0.50915	0.176352	0.199396	0.0861472	0.0429373
AC092484.1	0	0	0.296907	0.243668	0	0	0	0.0395859	0.598729	0.0253716	0	0.0172725	0.0206687	0	1.39589	0.795926	0.0178926	0	0.120164	0	0.157807	0.064088	0.018578	0.143757	0.0942598	0	0	0	0.130106	1.07409	0	0	0.0832958	0.26695	1.00563	0	0	0.0205602	1.85028	0	0.0206986	0.0171327	0.0186231	0.440862	0.06557	0	0.0646845	0	0.0318954
AC103563.1	0.177312	0.386031	0.174848	0	0.946282	0.292811	0.145599	0.536179	2.53425	0.515476	0.632859	0.116976	0.279952	0.201398	1.7929	2.75504	0	5.32753	0.271265	0.0979843	0.194314	0.108507	0	0.21635	0.478771	0.213252	0	0	0.550705	0	1.22231	2.29263	0.188036	0.278136	0.836374	0	0	0	0.140795	0.1097	0	0	0	0	4.73667	0	0.730111	0.17186	0.108003
IGHJ3P	0	1.58273	0.430127	0	7.24221	5.04221	0.358173	1.319	13.4037	2.11345	2.17957	0	0	0	10.024	15.9122	0	4.19383	0	1.92833	0.956025	0	5.57116	7.71722	0	0	0	0	2.43852	1.06514	0.644333	5.89622	2.31285	2.73686	9.99347	0	0	0	0	0.539724	0	0.856292	0	0	37.5056	1.11548	5.02901	0.422775	0.531377
TRAV35	0	0	0.0977562	0	1.4892	0.272847	0.162806	0.199849	0.519522	0.064044	0	0	0.208692	0	0.48601	0.357175	0.316157	0.794287	0.26962	0.328693	0.108639	0.647094	0.281372	0.564478	0	0	0	0.06392	0.0410525	0.225938	0.292878	0.233052	0.490604	0.207338	0.757081	0	0.102529	0.051899	0.104956	0	0	0	0.188037	0.0370947	0.606886	0.0422532	0.217706	0	0.0402558
TRAV12-2	0.14703	0.0711338	0.120822	0.0456125	5.43457	0.849811	0.321953	0.889214	2.83694	0.28496	0.314865	0.12933	0.19345	0.222669	1.03618	1.8541	1.07179	1.59036	1.12468	0.974999	0.456529	1.16968	0.730302	2.27241	1.01456	0.294719	0.223788	0	0.0913303	0.742006	1.39967	0.777713	0.363819	0.999414	2.37783	0.121513	0.228099	0.115461	0.505913	0.0606431	0.154983	0	0.383469	0.0550169	3.23218	0.376006	0.847585	0.0950056	0.179116
TRAV36DV7	0	0	0.0302056	0	1.48942	0.202336	0	0.231566	0.788039	0	0	0.0404158	0.241813	0.139169	0.337886	0.744951	0.334933	0.809905	0.437376	0.236979	0.0671366	0.637324	0.565115	1.3455	0.0551393	0.147359	0	0	0.152217	0.0598392	0.603308	0.540079	0	1.10512	0.990761	0.0379728	0.190083	0.0962173	0.291873	0.037902	0	0	0	0.103157	0.613705	0.0391673	0.201806	0	0.149263
CD48	2.45805	2.08355	1.36632	1.19033	21.0736	8.58043	1.76679	4.81935	12.3057	4.09909	3.11937	0.707535	3.2867	4.06309	11.0466	13.0819	3.05921	17.557	3.33927	4.28853	3.50771	8.6747	6.5324	13.777	4.68257	1.80261	0.674245	3.40822	1.62618	7.07272	7.28827	4.1108	2.26057	6.16503	19.7327	0.920765	2.56292	1.35486	4.74997	0.556374	1.41137	0.374879	3.52527	1.44323	12.2619	4.03315	7.46078	4.34526	1.18886
[truncated: 1,047 more columns]

## Sheet: ESTIMATE scores and group
ID	StromalScore	ImmuneScore	ESTIMATEScore	StromalScore	ImmuneScore	ESTIMATEScore
TCGA.OL.A5RW.01A.11R.A28M.07	LOW	LOW	LOW	-218.874	530.488	311.614
TCGA.E2.A14U.01A.11R.A22K.07	LOW	LOW	LOW	-511.432	-164.224	-675.656
TCGA.C8.A26V.01A.11R.A16F.07	LOW	LOW	LOW	120.115	408.101	528.217
TCGA.E9.A5UP.01A.11R.A28M.07	LOW	LOW	LOW	-1218.32	195.07	-1023.25
TCGA.E9.A1NE.01A.21R.A14M.07	HIGH	HIGH	HIGH	1069.13	2402.73	3471.86
TCGA.E2.A15E.06A.11R.A12D.07	LOW	LOW	LOW	-500.47	598.125	97.655
TCGA.A1.A0SQ.01A.21R.A144.07	LOW	LOW	LOW	-76.8875	154.331	77.4432
TCGA.A2.A0EV.01A.11R.A034.07	HIGH	HIGH	HIGH	952.51	1065.88	2018.39
TCGA.A2.A0SX.01A.12R.A084.07	HIGH	HIGH	HIGH	849.301	1979.42	2828.72
TCGA.E2.A1IU.01A.11R.A14D.07	LOW	LOW	LOW	-155.607	330.49	174.884
TCGA.BH.A0BO.01A.23R.A12D.07	HIGH	HIGH	HIGH	1342.72	1161.31	2504.04
TCGA.E2.A1LS.01A.12R.A157.07	LOW	LOW	LOW	-338.803	-258.998	-597.802
TCGA.A8.A08A.01A.11R.A32Y.07	HIGH	HIGH	HIGH	630.091	745.784	1375.88
TCGA.A7.A26E.01A.11R.A277.07	HIGH	LOW	HIGH	1135.79	436.172	1571.97
TCGA.E2.A573.01A.11R.A29R.07	LOW	HIGH	HIGH	-42.4145	1868.33	1825.92
TCGA.E9.A3QA.01A.61R.A22K.07	LOW	HIGH	HIGH	328.674	2217.18	2545.85
TCGA.AO.A1KS.01A.11R.A13Q.07	LOW	LOW	LOW	258.544	210.243	468.788
TCGA.AR.A2LH.01A.31R.A18M.07	HIGH	HIGH	HIGH	786.769	2063.67	2850.44
TCGA.BH.A202.01A.11R.A14M.07	LOW	HIGH	HIGH	522.89	1045.35	1568.24
TCGA.D8.A1JH.01A.11R.A13Q.07	HIGH	HIGH	HIGH	1235.33	946.635	2181.97
TCGA.D8.A1X9.01A.12R.A157.07	HIGH	HIGH	HIGH	894.466	731.553	1626.02
TCGA.D8.A1J8.01A.11R.A13Q.07	HIGH	HIGH	HIGH	770.475	1523.08	2293.56
TCGA.A2.A3XS.01A.11R.A22U.07	LOW	HIGH	LOW	136.769	844.208	980.977
TCGA.BH.A18V.06A.11R.A213.07	LOW	HIGH	HIGH	275.814	2493.73	2769.54
TCGA.GM.A5PV.01A.11R.A28M.07	LOW	LOW	LOW	-558.055	530.687	-27.368
TCGA.B6.A0WW.01A.11R.A109.07	LOW	LOW	LOW	361.296	-91.8589	269.437
TCGA.A2.A04R.01A.41R.A109.07	LOW	LOW	LOW	28.9404	-611.187	-582.247
TCGA.A8.A0AD.01A.11R.A056.07	HIGH	HIGH	HIGH	992.394	792.911	1785.31
TCGA.AN.A0G0.01A.11R.A034.07	LOW	LOW	LOW	-81.1369	91.729	10.592
TCGA.C8.A134.01A.11R.A115.07	LOW	HIGH	LOW	-54.0761	1154.07	1099.99
TCGA.A2.A25A.01A.12R.A16F.07	HIGH	HIGH	HIGH	1367.63	1102.78	2470.42
TCGA.D8.A27L.01A.11R.A16F.07	HIGH	HIGH	HIGH	1152.66	954.977	2107.64
TCGA.EW.A1OW.01A.21R.A144.07	HIGH	LOW	LOW	575.199	460.068	1035.27
TCGA.A8.A09M.01A.11R.A00Z.07	LOW	HIGH	HIGH	240.962	1210.42	1451.38
TCGA.A2.A0EP.01A.52R.A22U.07	HIGH	HIGH	HIGH	1905.75	3063.68	4969.44
TCGA.A2.A1FV.01A.11R.A13Q.07	LOW	LOW	LOW	127.408	-626.609	-499.201
TCGA.E2.A2P5.01A.11R.A19W.07	LOW	LOW	LOW	374.387	252.389	626.776
TCGA.A8.A07L.01A.11R.A00Z.07	LOW	LOW	LOW	221.195	-366.369	-145.175
TCGA.OL.A6VO.01A.12R.A33J.07	LOW	LOW	LOW	-463.846	492.581	28.7357
TCGA.AR.A24K.01A.11R.A169.07	LOW	LOW	LOW	-160.314	-574.692	-735.006
TCGA.AC.A3TN.01A.11R.A22K.07	LOW	LOW	LOW	98.4848	112.787	211.272
TCGA.B6.A0I1.01A.11R.A21T.07	LOW	LOW	LOW	-1141.15	-492.457	-1633.6
TCGA.A2.A25E.01A.11R.A169.07	LOW	LOW	LOW	153.302	-42.9766	110.325
TCGA.B6.A0IM.01A.11R.A034.07	LOW	LOW	LOW	373.248	-74.519	298.729
TCGA.A8.A07U.01A.11R.A034.07	HIGH	HIGH	HIGH	841.501	2347.7	3189.2
TCGA.B6.A0RP.01A.21R.A084.07	HIGH	HIGH	HIGH	961.319	712.888	1674.21
TCGA.BH.A0BW.01A.11R.A115.07	LOW	HIGH	HIGH	294.583	1838.87	2133.45
TCGA.B6.A0I5.01A.11R.A034.07	LOW	HIGH	LOW	341.475	671.53	1013
TCGA.AO.A124.01A.11R.A10J.07	LOW	LOW	LOW	-742.523	175.475	-567.047
TCGA.AR.A0U0.01A.11R.A109.07	LOW	HIGH	HIGH	153.334	1797.39	1950.73
TCGA.S3.AA0Z.01A.11R.A41B.07	LOW	HIGH	LOW	-177.318	1103.01	925.693
TCGA.AC.A2FO.01A.11R.A180.07	HIGH	HIGH	HIGH	1137.21	1640.43	2777.64
TCGA.EW.A1J3.01A.11R.A13Q.07	LOW	LOW	LOW	181.684	155.362	337.046
TCGA.A8.A076.01A.21R.A00Z.07	HIGH	LOW	HIGH	879.48	592.911	1472.39
TCGA.B6.A0RQ.01A.11R.A115.07	LOW	LOW	LOW	-95.3338	-372.75	-468.084
TCGA.E9.A5FK.01A.11R.A27Q.07	HIGH	HIGH	HIGH	805.493	2397.83	3203.32
TCGA.BH.A0BG.01A.11R.A115.07	LOW	HIGH	HIGH	126.202	1579.85	1706.06
TCGA.AR.A24U.01A.11R.A169.07	HIGH	HIGH	HIGH	1272.13	1910.92	3183.04
TCGA.A8.A096.01A.11R.A00Z.07	HIGH	HIGH	HIGH	1401.89	1748.82	3150.72
TCGA.A8.A09G.01A.21R.A00Z.07	LOW	HIGH	HIGH	168.108	1095.11	1263.22
TCGA.AC.A5XU.01A.11R.A28M.07	LOW	LOW	LOW	529.095	-22.6019	506.493
TCGA.B6.A0X5.01A.21R.A109.07	LOW	LOW	LOW	-391.66	-298.518	-690.177
TCGA.BH.A0AV.01A.31R.A115.07	HIGH	LOW	HIGH	1184.82	562.262	1747.09
TCGA.B6.A0RU.01A.11R.A084.07	LOW	LOW	LOW	234.107	-167.616	66.4914
TCGA.E9.A1R2.01A.11R.A14D.07	LOW	LOW	LOW	343.456	422.078	765.534
TCGA.A8.A08O.01A.21R.A056.07	LOW	LOW	LOW	485.367	-438.975	46.3926
TCGA.A2.A0YJ.01A.11R.A109.07	LOW	LOW	LOW	-647.451	-349.954	-997.405
TCGA.A2.A0D2.01A.21R.A034.07	LOW	HIGH	HIGH	222.478	1125.75	1348.23
TCGA.A8.A0A4.01A.11R.A00Z.07	HIGH	LOW	LOW	581.994	-219.094	362.899
TCGA.5L.AAT0.01A.12R.A41B.07	HIGH	HIGH	HIGH	1077.58	1271.76	2349.34
TCGA.BH.A1EV.01A.11R.A137.07	LOW	LOW	LOW	506.178	-223.866	282.312
TCGA.A2.A0EW.01A.21R.A115.07	HIGH	HIGH	HIGH	1331.78	965.138	2296.92
TCGA.EW.A1OY.01A.11R.A144.07	LOW	LOW	LOW	-109	198.423	89.423
TCGA.A8.A081.01A.11R.A00Z.07	LOW	HIGH	LOW	-339.111	1187.84	848.726
TCGA.D8.A73U.01A.11R.A33J.07	HIGH	HIGH	HIGH	1585.32	2962.64	4547.96
TCGA.AR.A24P.01A.11R.A169.07	HIGH	LOW	HIGH	913.651	331.458	1245.11
TCGA.A8.A079.01A.21R.A00Z.07	LOW	LOW	LOW	-243.368	246.285	2.91664
TCGA.AO.A0JL.01A.11R.A056.07	LOW	LOW	LOW	18.9963	-42.152	-23.1557
TCGA.PE.A5DD.01A.12R.A27Q.07	HIGH	HIGH	HIGH	674.732	852.337	1527.07
TCGA.B6.A0WT.01A.11R.A109.07	HIGH	LOW	LOW	646.659	-81.6197	565.039
TCGA.A8.A07P.01A.11R.A00Z.07	HIGH	LOW	LOW	577.555	467.942	1045.5
TCGA.B6.A0I2.01A.11R.A034.07	LOW	HIGH	HIGH	-325.766	2010.68	1684.92
TCGA.AR.A2LM.01A.11R.A180.07	HIGH	LOW	HIGH	1137.36	526.195	1663.55
TCGA.A2.A0YK.01A.22R.A109.07	HIGH	HIGH	HIGH	1268.11	2114.06	3382.18
TCGA.D8.A1JK.01A.11R.A13Q.07	HIGH	HIGH	HIGH	920.87	1668.52	2589.39
TCGA.A2.A1G1.01A.21R.A13Q.07	HIGH	HIGH	HIGH	942.896	1427.95	2370.84
TCGA.A7.A0DB.01C.02R.A277.07	HIGH	LOW	HIGH	1137.03	139.377	1276.4
TCGA.C8.A12P.01A.11R.A115.07	HIGH	LOW	HIGH	825.502	615.752	1441.25
TCGA.AR.A2LR.01A.12R.A18M.07	HIGH	LOW	LOW	752.076	-33.0702	719.006
TCGA.AN.A0XS.01A.22R.A109.07	HIGH	HIGH	HIGH	1136.86	1170.3	2307.16
TCGA.E9.A1RA.01A.11R.A14D.07	LOW	LOW	LOW	379.656	441.04	820.696
TCGA.A1.A0SG.01A.11R.A144.07	HIGH	LOW	HIGH	647.523	561.328	1208.85
TCGA.BH.A18P.01A.11R.A12D.07	LOW	LOW	LOW	346.67	311.543	658.213
TCGA.AC.A3W6.01A.12R.A22K.07	HIGH	HIGH	HIGH	1498.63	1642.67	3141.29
TCGA.E2.A158.01A.11R.A12D.07	LOW	LOW	LOW	-1159.02	-417.087	-1576.11
TCGA.AO.A0J5.01A.11R.A034.07	HIGH	LOW	HIGH	1287.04	278.283	1565.33
TCGA.WT.AB41.01A.11R.A41B.07	LOW	HIGH	HIGH	260.571	2245.45	2506.02
TCGA.BH.A0E0.01A.11R.A056.07	LOW	LOW	LOW	-683.611	328.471	-355.139
TCGA.AO.A0JF.01A.11R.A056.07	HIGH	HIGH	HIGH	1607.06	1175.28	2782.34
TCGA.A7.A4SA.01A.11R.A266.07	HIGH	HIGH	HIGH	790.69	1627.33	2418.02
TCGA.E2.A9RU.01A.11R.A41B.07	LOW	LOW	LOW	299.686	494.606	794.292
TCGA.E2.A1B1.01A.21R.A12P.07	HIGH	HIGH	HIGH	1493.8	1616.28	3110.08
TCGA.E2.A14X.01A.11R.A115.07	LOW	HIGH	HIGH	98.8483	1261.97	1360.81
TCGA.BH.A0DT.01A.21R.A12D.07	HIGH	HIGH	HIGH	740.702	800.886	1541.59
TCGA.B6.A0IC.01A.11R.A034.07	LOW	LOW	LOW	-1527.35	-507.713	-2035.07
TCGA.AR.A0TU.01A.31R.A109.07	LOW	HIGH	LOW	-676.424	1197.02	520.594
TCGA.AR.A2LJ.01A.12R.A19W.07	HIGH	HIGH	HIGH	1072.48	1839.76	2912.23
TCGA.D8.A1XA.01A.11R.A14D.07	LOW	LOW	LOW	253.246	231.536	484.782
TCGA.GM.A2DD.01A.11R.A180.07	HIGH	HIGH	HIGH	1248	2285.44	3533.44
TCGA.C8.A26W.01A.11R.A16F.07	HIGH	HIGH	HIGH	664.261	1072.21	1736.47
TCGA.LQ.A4E4.01A.11R.A266.07	LOW	LOW	LOW	-137.26	-527.942	-665.202
TCGA.BH.A0DP.01A.21R.A056.07	HIGH	HIGH	HIGH	944.96	1002.43	1947.39
TCGA.E2.A1IF.01A.11R.A144.07	HIGH	LOW	HIGH	862.931	521.11	1384.04
TCGA.C8.A26X.01A.31R.A16F.07	HIGH	HIGH	HIGH	1257.56	2079.61	3337.17
TCGA.BH.A0HW.01A.11R.A034.07	LOW	LOW	LOW	-1148.22	-1003.65	-2151.86
TCGA.A7.A5ZW.01A.12R.A29R.07	HIGH	HIGH	HIGH	1295.98	738.236	2034.22
TCGA.AN.A0FT.01A.11R.A034.07	HIGH	LOW	HIGH	785.349	613.555	1398.9
TCGA.B6.A0X1.01A.11R.A109.07	LOW	HIGH	LOW	-604.559	1091.21	486.649
TCGA.A8.A06Z.01A.11R.A00Z.07	LOW	LOW	LOW	-631.676	-165.737	-797.413
TCGA.A8.A09E.01A.11R.A00Z.07	LOW	LOW	LOW	-199.878	-252.502	-452.38
TCGA.EW.A6SD.01A.12R.A33J.07	LOW	HIGH	HIGH	419.922	1207.54	1627.46
TCGA.E2.A14V.01A.11R.A12D.07	LOW	LOW	LOW	-214.753	-300.941	-515.695
TCGA.E9.A226.01A.21R.A157.07	HIGH	LOW	LOW	779.882	-95.7108	684.171
TCGA.LL.A6FR.01A.12R.A31O.07	LOW	LOW	LOW	400.031	228.631	628.662
TCGA.AC.A4ZE.01A.11R.A41B.07	LOW	LOW	LOW	-83.839	-69.0746	-152.914
TCGA.D8.A1XJ.01A.11R.A14M.07	LOW	LOW	LOW	372.174	3.92208	376.096
TCGA.A7.A4SD.01A.11R.A266.07	LOW	HIGH	HIGH	490.11	1383.2	1873.31
TCGA.AR.A0TX.01A.11R.A084.07	HIGH	HIGH	HIGH	933.755	1769.72	2703.48
TCGA.A2.A1FX.01A.11R.A13Q.07	HIGH	LOW	HIGH	701.574	599.331	1300.91
TCGA.A8.A09B.01A.11R.A00Z.07	LOW	LOW	LOW	417.148	45.7187	462.867
TCGA.A1.A0SI.01A.11R.A144.07	HIGH	HIGH	HIGH	1315.46	1106.04	2421.51
TCGA.C8.A12L.01A.11R.A115.07	LOW	LOW	LOW	-295.315	258.216	-37.0987
TCGA.A1.A0SD.01A.11R.A115.07	HIGH	LOW	HIGH	895.997	423.091	1319.09
TCGA.A8.A086.01A.11R.A00Z.07	HIGH	LOW	LOW	902.007	84.628	986.635
TCGA.AR.A0TS.01A.11R.A115.07	HIGH	HIGH	HIGH	647.938	2166.96	2814.9
TCGA.E9.A22B.01A.11R.A157.07	HIGH	LOW	HIGH	957.04	477.072	1434.11
TCGA.A2.A0SU.01A.11R.A084.07	LOW	LOW	LOW	439.893	508.147	948.041
TCGA.B6.A0WS.01A.11R.A115.07	HIGH	HIGH	HIGH	896.653	1428.51	2325.16
TCGA.BH.A0H5.01A.21R.A115.07	HIGH	HIGH	HIGH	823.949	3051.97	3875.92
TCGA.A7.A4SC.01A.12R.A266.07	HIGH	LOW	HIGH	747.982	613.258	1361.24
TCGA.A2.A0D1.01A.11R.A034.07	LOW	LOW	LOW	-299.144	-379.818	-678.962
TCGA.D8.A1XT.01A.11R.A14M.07	HIGH	HIGH	HIGH	1172.2	858.862	2031.06
TCGA.E2.A10E.01A.21R.A10J.07	LOW	LOW	LOW	88.069	269.302	357.371
TCGA.A1.A0SO.01A.22R.A084.07	LOW	LOW	LOW	-1121.61	-585.234	-1706.84
TCGA.AR.A0TW.01A.11R.A084.07	LOW	HIGH	HIGH	154.251	1198.07	1352.32
TCGA.AO.A0J7.01A.11R.A034.07	LOW	LOW	LOW	-362.24	-496.614	-858.854
TCGA.BH.A0W5.01A.11R.A109.07	HIGH	HIGH	HIGH	972.427	2071.59	3044.01
TCGA.AN.A0FJ.01A.11R.A00Z.07	LOW	LOW	LOW	192.848	-10.2977	182.55
TCGA.C8.A12W.01A.11R.A115.07	HIGH	HIGH	HIGH	987.836	704.636	1692.47
TCGA.LL.A6FP.01A.11R.A31O.07	LOW	LOW	LOW	-1034.29	-515.112	-1549.41
TCGA.C8.A12X.01A.11R.A115.07	LOW	LOW	LOW	86.7572	319.457	406.215
TCGA.B6.A0I6.01A.11R.A034.07	LOW	LOW	LOW	288.317	-108.975	179.342
TCGA.AC.A2FE.01A.11R.A19W.07	HIGH	HIGH	HIGH	1119.24	2020.38	3139.62
TCGA.A7.A13F.01A.11R.A12P.07	LOW	LOW	LOW	113.297	186.212	299.509
TCGA.AR.A1AS.01A.11R.A12P.07	LOW	LOW	LOW	113.716	81.0595	194.775
TCGA.BH.A0DX.01A.11R.A115.07	HIGH	HIGH	HIGH	1308.58	1195.1	2503.68
TCGA.D8.A27F.01A.11R.A16F.07	LOW	LOW	LOW	460.745	169.534	630.279
TCGA.A2.A1G0.01A.11R.A13Q.07	HIGH	HIGH	HIGH	975.611	828.578	1804.19
TCGA.BH.A42U.01A.12R.A24H.07	HIGH	HIGH	HIGH	728.467	1382.58	2111.05
TCGA.BH.A0DQ.01A.11R.A084.07	HIGH	LOW	HIGH	1359.94	515.802	1875.74
TCGA.AO.A1KT.01A.11R.A13Q.07	HIGH	LOW	HIGH	763.161	514.918	1278.08
TCGA.D8.A1XC.01A.11R.A14D.07	LOW	LOW	LOW	-939.127	-354.606	-1293.73
TCGA.D8.A1Y2.01A.11R.A157.07	HIGH	HIGH	HIGH	1706.83	2218.13	3924.96
TCGA.A2.A0T1.01A.21R.A084.07	HIGH	HIGH	HIGH	1397.33	2124.82	3522.14
TCGA.A8.A07R.01A.21R.A034.07	LOW	LOW	LOW	-635.436	-164.223	-799.66
TCGA.A2.A0CQ.01A.21R.A034.07	LOW	HIGH	LOW	-52.7273	733.51	680.782
TCGA.BH.A0H3.01A.11R.A12P.07	HIGH	HIGH	HIGH	1099.29	729.2	1828.49
TCGA.BH.A0B0.01A.21R.A115.07	HIGH	HIGH	HIGH	1164.8	1309.62	2474.41
TCGA.E9.A1RD.01A.11R.A157.07	LOW	LOW	LOW	480.919	178.579	659.498
TCGA.EW.A3U0.01A.11R.A22K.07	HIGH	HIGH	HIGH	1002.63	2675.84	3678.47
TCGA.A7.A5ZV.01A.11R.A28M.07	LOW	LOW	LOW	-366.2	557.903	191.702
TCGA.AR.A251.01A.12R.A169.07	LOW	LOW	LOW	161.408	255.477	416.885
TCGA.BH.A1ES.06A.12R.A24H.07	LOW	LOW	LOW	-789.484	-325.534	-1115.02
TCGA.BH.A203.01A.12R.A169.07	LOW	HIGH	HIGH	342.444	1045.32	1387.77
TCGA.A7.A26E.01B.06R.A277.07	HIGH	LOW	HIGH	1124.15	449.474	1573.62
TCGA.D8.A27E.01A.11R.A16F.07	LOW	LOW	LOW	-10.8464	284.999	274.153
TCGA.E2.A1IN.01A.11R.A13Q.07	HIGH	LOW	LOW	1093.19	81.7085	1174.9
TCGA.BH.A0HL.01A.11R.A10U.07	LOW	LOW	LOW	-1031.93	-1148.41	-2180.34
TCGA.EW.A1P0.01A.11R.A144.07	LOW	LOW	LOW	184.343	318.017	502.36
TCGA.B6.A0IH.01A.11R.A115.07	HIGH	HIGH	HIGH	964.142	1022.1	1986.24
TCGA.S3.AA10.01A.21R.A41B.07	LOW	HIGH	HIGH	306.851	2291.96	2598.81
TCGA.A8.A08T.01A.21R.A00Z.07	LOW	LOW	LOW	376.097	78.6333	454.73
TCGA.BH.A0HQ.01A.11R.A034.07	HIGH	LOW	LOW	606.111	17.0154	623.127
TCGA.A2.A0EX.01A.21R.A034.07	HIGH	LOW	HIGH	985.076	522.065	1507.14
TCGA.AC.A2FK.01A.12R.A180.07	LOW	LOW	LOW	404.935	610.697	1015.63
TCGA.AR.A24M.01A.11R.A169.07	HIGH	LOW	HIGH	946.588	267.08	1213.67
TCGA.BH.A0WA.01A.11R.A109.07	LOW	LOW	LOW	191.003	341.549	532.552
TCGA.AR.A24V.01A.21R.A169.07	HIGH	HIGH	HIGH	1524.51	827.219	2351.73
TCGA.BH.A18H.01A.11R.A12D.07	HIGH	HIGH	HIGH	546.703	1830.91	2377.61
TCGA.A7.A4SB.01A.21R.A266.07	LOW	LOW	LOW	68.9514	-439.534	-370.583
TCGA.AC.A2QJ.01A.12R.A19W.07	HIGH	HIGH	HIGH	1235.86	1929.16	3165.02
TCGA.AO.A0J4.01A.11R.A034.07	LOW	HIGH	HIGH	219.448	1403.43	1622.87
TCGA.AR.A1AY.01A.21R.A12P.07	LOW	LOW	LOW	-108.112	4.63706	-103.475
TCGA.A2.A0ST.01A.12R.A084.07	HIGH	HIGH	HIGH	661.334	3010.51	3671.84
TCGA.D8.A1JS.01A.11R.A13Q.07	LOW	LOW	LOW	-1001.56	-322.777	-1324.34
TCGA.AC.A6IX.06A.11R.A32P.07	LOW	HIGH	HIGH	116.697	1907.48	2024.18
TCGA.OL.A6VQ.01A.12R.A41B.07	HIGH	HIGH	HIGH	931.629	641.607	1573.24
TCGA.B6.A0WZ.01A.11R.A109.07	LOW	LOW	LOW	-3.44356	-306.95	-310.393
TCGA.AC.A8OQ.01A.11R.A41B.07	HIGH	HIGH	HIGH	887.933	1493.17	2381.1
TCGA.B6.A0X0.01A.21R.A115.07	LOW	LOW	LOW	-728.735	-301.696	-1030.43
TCGA.OL.A66N.01A.12R.A31O.07	HIGH	HIGH	HIGH	698.442	1073.98	1772.42
TCGA.AO.A1KP.01A.11R.A13Q.07	LOW	LOW	LOW	-491.107	-693.112	-1184.22
TCGA.BH.A0HO.01A.11R.A034.07	LOW	HIGH	HIGH	507.242	836.615	1343.86
TCGA.UL.AAZ6.01A.11R.A41B.07	LOW	LOW	LOW	-753.051	44.3482	-708.702
TCGA.E9.A1N8.01A.11R.A144.07	LOW	LOW	LOW	-706.892	-494.842	-1201.73
TCGA.BH.A0BV.01A.11R.A00Z.07	HIGH	HIGH	HIGH	964.606	1061.18	2025.79
TCGA.A8.A06T.01A.11R.A00Z.07	LOW	LOW	LOW	329.489	483.919	813.408
TCGA.EW.A2FS.01A.11R.A17B.07	LOW	HIGH	LOW	141.01	818.929	959.938
TCGA.OL.A66J.01A.11R.A29R.07	HIGH	LOW	HIGH	815.473	442.346	1257.82
TCGA.A7.A0CJ.01A.21R.A00Z.07	LOW	LOW	LOW	-414.466	30.3043	-384.162
TCGA.E2.A15A.01A.11R.A12D.07	HIGH	HIGH	HIGH	612.756	875.899	1488.65
TCGA.A8.A08B.01A.11R.A00Z.07	LOW	HIGH	LOW	-513.439	666.087	152.648
TCGA.E2.A570.01A.11R.A29R.07	HIGH	LOW	LOW	819.729	47.755	867.484
TCGA.E2.A56Z.01A.12R.A29R.07	LOW	LOW	LOW	-254.031	-110.92	-364.952
TCGA.A7.A6VV.01A.22R.A33J.07	HIGH	HIGH	HIGH	932.95	965.984	1898.93
TCGA.A2.A3KC.01A.11R.A213.07	HIGH	HIGH	HIGH	1066.37	749.182	1815.56
TCGA.D8.A140.01A.11R.A115.07	LOW	HIGH	LOW	325.249	683.964	1009.21
TCGA.E9.A249.01A.11R.A169.07	LOW	LOW	LOW	-176.988	115.137	-61.851
TCGA.AO.A03O.01A.11R.A00Z.07	LOW	HIGH	LOW	-158.612	899.574	740.962
TCGA.E2.A1IO.01A.11R.A144.07	HIGH	HIGH	HIGH	1300.73	912.157	2212.89
TCGA.D8.A27R.01A.11R.A16F.07	HIGH	HIGH	HIGH	660.283	874.517	1534.8
TCGA.BH.A0AY.01A.21R.A00Z.07	HIGH	HIGH	HIGH	1373.91	1128.33	2502.24
TCGA.OL.A5DA.01A.11R.A27Q.07	LOW	LOW	LOW	41.1015	324.031	365.132
TCGA.C8.A12M.01A.11R.A115.07	LOW	LOW	LOW	-326.173	-32.6709	-358.844
TCGA.BH.A0E6.01A.11R.A034.07	LOW	HIGH	LOW	-8.31706	857.59	849.273
TCGA.B6.A0RS.01A.11R.A084.07	LOW	HIGH	HIGH	390.477	1101.97	1492.44
TCGA.E2.A1B0.01A.11R.A12P.07	HIGH	HIGH	HIGH	644.361	783.246	1427.61
TCGA.A7.A0DA.01A.31R.A115.07	LOW	LOW	LOW	413.833	-59.3009	354.532
TCGA.BH.A18N.01A.11R.A12D.07	LOW	LOW	LOW	43.0593	-78.8489	-35.7897
TCGA.AN.A0FF.01A.11R.A034.07	HIGH	HIGH	HIGH	613.61	956.351	1569.96
TCGA.BH.A1EN.01A.11R.A13Q.07	LOW	LOW	LOW	352.64	-115.632	237.008
TCGA.D8.A27K.01A.11R.A16F.07	HIGH	HIGH	HIGH	629.289	814.448	1443.74
TCGA.A2.A259.01A.11R.A16F.07	HIGH	HIGH	HIGH	797.677	938.012	1735.69
TCGA.C8.A27B.01A.11R.A169.07	LOW	HIGH	HIGH	-127.242	1583.75	1456.5
TCGA.BH.A18L.01A.32R.A12D.07	LOW	LOW	LOW	-653.652	-219.535	-873.188
TCGA.E2.A15P.01A.11R.A115.07	LOW	LOW	LOW	329.552	-100.961	228.591
TCGA.A8.A0A9.01A.11R.A00Z.07	LOW	LOW	LOW	514.305	421.642	935.947
TCGA.C8.A12N.01A.11R.A115.07	HIGH	HIGH	HIGH	1067.42	739.038	1806.46
TCGA.OL.A5RU.01A.11R.A28M.07	LOW	HIGH	HIGH	371.15	1626.18	1997.33
TCGA.E2.A1BD.01A.11R.A12P.07	LOW	LOW	LOW	352.699	15.443	368.142
TCGA.E2.A154.01A.11R.A115.07	LOW	LOW	LOW	299.216	-355.165	-55.9491
TCGA.AR.A1AR.01A.31R.A137.07	HIGH	HIGH	HIGH	1097.5	1868.05	2965.56
TCGA.GM.A3NW.01A.21R.A22K.07	LOW	LOW	LOW	-31.6839	277.137	245.453
TCGA.AN.A04C.01A.21R.A034.07	LOW	LOW	LOW	-270.75	433.954	163.203
TCGA.A2.A25D.01A.12R.A16F.07	HIGH	HIGH	HIGH	572.763	1954.92	2527.68
TCGA.C8.A273.01A.11R.A16F.07	HIGH	LOW	LOW	611.197	136.402	747.598
TCGA.C8.A131.01A.11R.A115.07	HIGH	HIGH	HIGH	571.151	741.911	1313.06
TCGA.AC.A2QI.01A.12R.A19W.07	HIGH	HIGH	HIGH	1004.95	1013.08	2018.03
TCGA.A7.A6VX.01A.12R.A33J.07	HIGH	LOW	LOW	566.43	152.635	719.065
TCGA.C8.A274.01A.11R.A16F.07	LOW	LOW	LOW	-405.388	-39.4302	-444.818
TCGA.AR.A2LO.01A.31R.A18M.07	HIGH	HIGH	HIGH	830.703	1431.35	2262.05
TCGA.AO.A0J8.01A.21R.A034.07	LOW	HIGH	HIGH	502.915	872.171	1375.09
TCGA.OK.A5Q2.01A.11R.A27Q.07	HIGH	HIGH	HIGH	710.739	1395.29	2106.03
TCGA.D8.A1XV.01A.11R.A14M.07	LOW	LOW	LOW	-614.559	-454.508	-1069.07
TCGA.AR.A2LL.01A.11R.A180.07	LOW	HIGH	LOW	280.005	707.629	987.634
TCGA.A2.A04X.01A.21R.A034.07	LOW	HIGH	HIGH	345.839	1706.65	2052.49
TCGA.C8.A8HQ.01A.11R.A36F.07	HIGH	HIGH	HIGH	1009.27	1106.96	2116.23
TCGA.E9.A1N9.01A.11R.A14D.07	LOW	LOW	LOW	365.446	237.73	603.176
TCGA.BH.A0B1.01A.12R.A056.07	HIGH	LOW	LOW	619.619	180.613	800.232
TCGA.D8.A1XW.01A.11R.A14M.07	HIGH	HIGH	HIGH	1155.87	1475.63	2631.5
TCGA.GM.A2D9.01A.11R.A18M.07	HIGH	HIGH	LOW	541.905	619.453	1161.36
TCGA.E2.A15D.01A.11R.A115.07	LOW	LOW	LOW	528.406	339.966	868.373
TCGA.OL.A5D6.01A.21R.A27Q.07	HIGH	LOW	HIGH	1002.81	587.666	1590.48
TCGA.AR.A1AM.01A.41R.A22K.07	HIGH	HIGH	HIGH	687.351	682.458	1369.81
TCGA.BH.A0DZ.01A.11R.A00Z.07	HIGH	HIGH	HIGH	1280.76	1069.85	2350.61
TCGA.GM.A2DA.01A.11R.A18M.07	HIGH	HIGH	HIGH	1029.9	1575.13	2605.03
TCGA.AO.A12F.01A.11R.A115.07	LOW	LOW	LOW	488.873	-146.682	342.191
TCGA.A7.A26J.01A.11R.A169.07	HIGH	LOW	LOW	735.325	318.877	1054.2
TCGA.BH.A18J.01A.11R.A12D.07	HIGH	LOW	LOW	655.281	135.743	791.023
TCGA.E9.A1N6.01A.11R.A144.07	HIGH	LOW	HIGH	937.502	406.337	1343.84
TCGA.D8.A1XD.01A.11R.A14D.07	LOW	LOW	LOW	468.353	-788.007	-319.653
TCGA.BH.A18G.01A.11R.A12D.07	LOW	LOW	LOW	171.865	483.614	655.479
TCGA.A8.A0A2.01A.11R.A034.07	HIGH	HIGH	HIGH	680.628	648.177	1328.8
TCGA.BH.A0W4.01A.11R.A109.07	LOW	LOW	LOW	525.414	-296.315	229.099
TCGA.E9.A1R5.01A.11R.A14M.07	HIGH	LOW	LOW	596.473	-96.1344	500.339
TCGA.D8.A141.01A.11R.A115.07	HIGH	HIGH	HIGH	1604.11	2158.88	3762.99
TCGA.A8.A09I.01A.22R.A034.07	HIGH	HIGH	HIGH	548.061	1075.05	1623.11
TCGA.EW.A1PA.01A.11R.A144.07	LOW	LOW	LOW	295.998	321.338	617.336
TCGA.AC.A3YJ.01A.11R.A22U.07	LOW	HIGH	LOW	-216.316	777.064	560.748
TCGA.BH.A0DH.01A.11R.A084.07	LOW	LOW	LOW	199.716	448.456	648.172
TCGA.E2.A15J.01A.11R.A12P.07	LOW	LOW	LOW	-291.473	-197.91	-489.383
TCGA.E2.A106.01A.11R.A10J.07	LOW	LOW	LOW	-534.662	-602.52	-1137.18
TCGA.D8.A1JG.01B.11R.A13Q.07	HIGH	HIGH	HIGH	863.65	1341.48	2205.13
TCGA.AC.A8OS.01A.12R.A41B.07	HIGH	HIGH	HIGH	1114.81	1065.43	2180.24
TCGA.AR.A24H.01A.11R.A169.07	LOW	HIGH	LOW	-173.403	632.234	458.831
TCGA.D8.A1Y0.01A.11R.A14M.07	HIGH	HIGH	HIGH	991.101	1288.72	2279.82
TCGA.A2.A0YM.01A.11R.A109.07	LOW	HIGH	HIGH	181.068	1071.77	1252.84
TCGA.AO.A0JM.01A.21R.A056.07	HIGH	LOW	HIGH	769.309	460.082	1229.39
TCGA.AR.A5QQ.01A.11R.A28M.07	LOW	HIGH	HIGH	506.319	2189.62	2695.94
TCGA.BH.A0DS.01A.11R.A056.07	HIGH	HIGH	HIGH	828.555	1072.58	1901.14
TCGA.E9.A1NC.01A.21R.A26B.07	HIGH	HIGH	HIGH	800.194	1717.26	2517.45
TCGA.AR.A1AI.01A.11R.A12P.07	LOW	HIGH	HIGH	-263.038	1795.35	1532.31
TCGA.E2.A152.01A.11R.A12D.07	HIGH	LOW	HIGH	999.008	452.554	1451.56
TCGA.A8.A09W.01A.11R.A00Z.07	HIGH	LOW	HIGH	765.438	560.448	1325.89
TCGA.E9.A1NF.01A.11R.A14D.07	HIGH	HIGH	HIGH	1751.16	842.65	2593.81
TCGA.A8.A099.01A.11R.A00Z.07	LOW	LOW	LOW	295.37	262.03	557.4
TCGA.A2.A04T.01A.21R.A034.07	LOW	HIGH	LOW	-262.085	1162.96	900.871
TCGA.E2.A150.01A.11R.A12D.07	LOW	HIGH	HIGH	491.678	1032.07	1523.75
TCGA.D8.A27T.01A.11R.A16F.07	HIGH	HIGH	HIGH	1253.47	1179.28	2432.75
TCGA.BH.A0H6.01A.21R.A056.07	HIGH	LOW	LOW	643.906	-182.16	461.746
TCGA.AC.A7VC.01A.11R.A352.07	HIGH	LOW	HIGH	925.704	615.727	1541.43
TCGA.AR.A1AO.01A.11R.A12P.07	HIGH	HIGH	HIGH	1634.54	2675.23	4309.77
TCGA.A7.A3IZ.01A.11R.A213.07	LOW	LOW	LOW	-367.917	-177.347	-545.264
TCGA.BH.A1F2.01A.31R.A13Q.07	HIGH	LOW	HIGH	1087.41	278.263	1365.67
TCGA.LL.A8F5.01A.11R.A36F.07	LOW	HIGH	LOW	21.2674	1078.74	1100.01
TCGA.BH.A1FN.01A.11R.A13Q.07	LOW	LOW	LOW	377.754	87.6398	465.394
TCGA.4H.AAAK.01A.12R.A41B.07	HIGH	LOW	HIGH	1125.23	500.475	1625.7
TCGA.EW.A1OZ.01A.11R.A144.07	HIGH	HIGH	HIGH	648.818	708.609	1357.43
TCGA.GM.A3NY.01A.11R.A21T.07	LOW	LOW	LOW	162.925	298.448	461.373
TCGA.BH.A0HU.01A.11R.A034.07	LOW	LOW	LOW	-307.037	-6.37674	-313.413
TCGA.A8.A06O.01A.11R.A00Z.07	LOW	LOW	LOW	469.88	462.731	932.611
TCGA.B6.A0IP.01A.11R.A034.07	LOW	LOW	LOW	52.6556	350.88	403.535
TCGA.BH.A0GY.01A.11R.A056.07	LOW	HIGH	LOW	426.128	682.002	1108.13
TCGA.E2.A15K.01A.11R.A12P.07	LOW	HIGH	HIGH	364.141	1242.65	1606.79
TCGA.D8.A1JE.01A.11R.A13Q.07	HIGH	HIGH	HIGH	1436.64	759.69	2196.33
TCGA.BH.A0C1.01B.11R.A12D.07	HIGH	HIGH	HIGH	727.672	824.149	1551.82
TCGA.A1.A0SH.01A.11R.A084.07	HIGH	LOW	HIGH	1485.71	372.483	1858.19
TCGA.BH.A0H7.01A.13R.A056.07	HIGH	LOW	LOW	800.548	206.373	1006.92
TCGA.E2.A576.01A.11R.A31O.07	LOW	LOW	LOW	-37.8557	224.591	186.735
TCGA.A2.A4RY.01A.31R.A266.07	HIGH	HIGH	HIGH	806.349	773.385	1579.73
TCGA.EW.A2FW.01A.11R.A17B.07	LOW	LOW	LOW	130.2	-184.024	-53.824
TCGA.B6.A0IG.01A.11R.A034.07	LOW	LOW	LOW	-99.0181	-18.6407	-117.659
TCGA.B6.A0IO.01A.11R.A034.07	LOW	LOW	LOW	-520.208	243.44	-276.768
TCGA.AN.A0AK.01A.21R.A00Z.07	LOW	LOW	LOW	-402.984	207.779	-195.205
TCGA.AN.A041.01A.11R.A034.07	HIGH	LOW	LOW	826.051	174.144	1000.2
TCGA.E2.A15L.01A.11R.A12D.07	LOW	LOW	LOW	522.552	-126.058	396.494
TCGA.A2.A25C.01A.11R.A169.07	HIGH	LOW	LOW	656.051	417.767	1073.82
TCGA.A8.A0A7.01A.11R.A00Z.07	HIGH	HIGH	HIGH	1529.27	2735.37	4264.64
TCGA.AR.A0U3.01A.11R.A109.07	LOW	LOW	LOW	-489.67	80.0001	-409.669
TCGA.EW.A1PB.01A.11R.A144.07	LOW	HIGH	HIGH	119.195	2437.48	2556.67
TCGA.OL.A66K.01A.11R.A29R.07	HIGH	LOW	LOW	610.242	-5.53749	604.704
TCGA.S3.AA12.01A.11R.A41B.07	LOW	LOW	LOW	-400.551	-305.008	-705.56
TCGA.AO.A03N.01B.11R.A10J.07	LOW	LOW	LOW	412.267	35.8476	448.115
TCGA.OL.A6VR.01A.32R.A33J.07	LOW	LOW	LOW	-849.56	-447.017	-1296.58
TCGA.A2.A4RW.01A.21R.A266.07	HIGH	LOW	HIGH	658.998	526.629	1185.63
TCGA.A7.A0DB.01A.11R.A00Z.07	HIGH	HIGH	HIGH	872.94	735.949	1608.89
TCGA.E2.A14Z.01A.11R.A115.07	HIGH	HIGH	HIGH	749.985	1803.14	2553.12
TCGA.E9.A245.01A.22R.A16F.07	LOW	LOW	LOW	-207.119	-303.849	-510.968
TCGA.D8.A1Y3.01A.11R.A157.07	LOW	HIGH	HIGH	168.96	1238.73	1407.69
TCGA.BH.A0B9.01A.11R.A056.07	LOW	HIGH	LOW	-667.01	1699.95	1032.94
TCGA.AR.A0TY.01A.12R.A115.07	LOW	LOW	LOW	-351.175	-224.338	-575.513
TCGA.E9.A1R7.01A.11R.A14M.07	LOW	LOW	LOW	-299.768	-557.501	-857.269
TCGA.BH.A0HI.01A.11R.A084.07	HIGH	LOW	LOW	713.76	442.676	1156.44
TCGA.LL.A740.01A.21R.A32P.07	HIGH	HIGH	HIGH	1031.51	656.284	1687.79
TCGA.E2.A15C.01A.31R.A12D.07	HIGH	LOW	LOW	646.295	242.771	889.065
TCGA.E2.A1AZ.01A.11R.A12P.07	HIGH	HIGH	HIGH	961.685	1502.47	2464.15
TCGA.A2.A04U.01A.11R.A115.07	LOW	LOW	LOW	-171.095	-260.203	-431.298
TCGA.EW.A1PH.01A.11R.A14M.07	LOW	LOW	LOW	-299.248	215.071	-84.1771
TCGA.D8.A1JT.01A.31R.A13Q.07	LOW	LOW	LOW	-319.911	180.204	-139.707
TCGA.BH.A0BA.01A.11R.A056.07	LOW	LOW	LOW	516.372	467.757	984.129
TCGA.A8.A06U.01A.11R.A00Z.07	LOW	HIGH	LOW	-62.4991	622.424	559.925
TCGA.C8.A8HR.01A.11R.A36F.07	HIGH	HIGH	HIGH	1422.23	1534.24	2956.47
TCGA.S3.AA11.01A.31R.A41B.07	LOW	LOW	LOW	-390.832	-572.632	-963.464
TCGA.BH.A18T.01A.11R.A12D.07	LOW	LOW	LOW	-341.207	321.291	-19.9157
TCGA.E2.A1L7.01A.11R.A144.07	LOW	HIGH	HIGH	343.456	1423.91	1767.37
TCGA.E9.A5FL.01A.11R.A27Q.07	LOW	LOW	LOW	332.689	568.399	901.088
TCGA.AN.A0AL.01A.11R.A00Z.07	HIGH	HIGH	HIGH	854.148	1229.65	2083.8
TCGA.E9.A1QZ.01A.21R.A169.07	HIGH	HIGH	HIGH	832.522	1826.24	2658.76
TCGA.A8.A097.01A.11R.A034.07	HIGH	HIGH	HIGH	916.04	639.845	1555.89
TCGA.BH.A42T.01A.11R.A24H.07	LOW	HIGH	HIGH	400.985	787.223	1188.21
TCGA.E9.A1RF.01A.11R.A157.07	HIGH	HIGH	HIGH	1024.44	1321.97	2346.41
TCGA.E9.A243.01A.21R.A169.07	HIGH	HIGH	HIGH	1328.03	2778.32	4106.35
TCGA.A8.A06P.01A.11R.A00Z.07	HIGH	LOW	HIGH	1287.4	481.066	1768.46
TCGA.A8.A08S.01A.11R.A034.07	LOW	LOW	LOW	85.9431	210.528	296.472
TCGA.A8.A09A.01A.11R.A00Z.07	HIGH	LOW	HIGH	894.594	512.166	1406.76
TCGA.A2.A4S2.01A.12R.A266.07	HIGH	HIGH	HIGH	619.06	1348.1	1967.16
TCGA.A7.A0DC.01A.11R.A00Z.07	LOW	LOW	LOW	-938.841	-1008.21	-1947.06
TCGA.E9.A1R3.01A.31R.A14M.07	HIGH	HIGH	HIGH	940.96	972.337	1913.3
TCGA.BH.A18U.01A.21R.A12D.07	LOW	LOW	LOW	490.083	501.144	991.227
TCGA.E2.A1L9.01A.11R.A13Q.07	HIGH	HIGH	HIGH	1413.7	887.06	2300.76
TCGA.A7.A0CG.01A.12R.A056.07	HIGH	HIGH	HIGH	1219.85	1455.65	2675.5
TCGA.A2.A0D0.01A.11R.A00Z.07	LOW	HIGH	LOW	-884.061	934.182	50.1217
TCGA.D8.A13Y.01A.11R.A115.07	LOW	LOW	LOW	-927.272	-1000.53	-1927.8
TCGA.B6.A0I9.01A.11R.A034.07	LOW	LOW	LOW	-366.349	291.794	-74.5547
TCGA.A7.A3J1.01A.11R.A213.07	HIGH	HIGH	HIGH	907.742	1718	2625.74
TCGA.A2.A25B.01A.11R.A169.07	HIGH	LOW	HIGH	662.521	609.064	1271.59
TCGA.E2.A1LI.01A.12R.A157.07	LOW	HIGH	LOW	-391.649	953.938	562.289
TCGA.E9.A1RE.01A.11R.A157.07	LOW	LOW	LOW	-95.7578	-412.949	-508.706
TCGA.AR.A250.01A.31R.A169.07	HIGH	HIGH	HIGH	1277.34	927.849	2205.19
TCGA.A2.A0YI.01A.31R.A10J.07	HIGH	HIGH	HIGH	1125.35	1763.41	2888.77
TCGA.B6.A0RO.01A.22R.A084.07	LOW	LOW	LOW	-419.652	-177.854	-597.506
TCGA.A2.A4S1.01A.21R.A266.07	HIGH	HIGH	HIGH	1467.82	1805	3272.82
TCGA.AC.A3YI.01A.21R.A239.07	HIGH	HIGH	HIGH	1163.69	781.062	1944.75
TCGA.A7.A13D.01A.13R.A12P.07	LOW	LOW	LOW	-32.3528	-254.345	-286.698
TCGA.D8.A27V.01A.12R.A17B.07	HIGH	LOW	LOW	688.582	55.2785	743.861
TCGA.A2.A0D4.01A.11R.A00Z.07	LOW	LOW	LOW	-373.611	-540.694	-914.305
TCGA.A2.A0EN.01A.13R.A084.07	HIGH	HIGH	HIGH	1530.49	2127.91	3658.4
TCGA.W8.A86G.01A.21R.A36F.07	LOW	LOW	LOW	217.174	-473.931	-256.757
TCGA.C8.A1HK.01A.21R.A13Q.07	LOW	LOW	LOW	-275.124	125.628	-149.495
TCGA.D8.A3Z5.01A.41R.A24H.07	LOW	LOW	LOW	-53.3168	-54.9658	-108.283
TCGA.EW.A423.01A.11R.A24H.07	LOW	HIGH	LOW	-133.839	974.575	840.736
TCGA.BH.A0DE.01A.11R.A115.07	HIGH	HIGH	HIGH	1129.16	1007.05	2136.21
TCGA.E2.A1IL.01A.11R.A14D.07	HIGH	LOW	LOW	598.117	-208.568	389.548
TCGA.EW.A1PF.01A.11R.A144.07	HIGH	HIGH	HIGH	1088.65	686.532	1775.18
TCGA.GM.A2DB.01A.31R.A18M.07	LOW	HIGH	LOW	-426.986	1048.39	621.405
TCGA.D8.A1XY.01A.11R.A14M.07	HIGH	LOW	LOW	1012	157.578	1169.57
TCGA.BH.A1FM.01A.11R.A13Q.07	HIGH	LOW	LOW	792.67	1.54163	794.212
TCGA.A7.A56D.01A.11R.A27Q.07	HIGH	HIGH	HIGH	821.355	1036.09	1857.44
TCGA.AR.A1AH.01A.11R.A12D.07	LOW	LOW	LOW	-438.799	-384.996	-823.794
TCGA.A8.A07C.01A.11R.A034.07	LOW	HIGH	LOW	76.1899	838.074	914.264
TCGA.A2.A0EY.01A.11R.A034.07	LOW	HIGH	HIGH	354.925	871.934	1226.86
TCGA.D8.A1JB.01A.11R.A13Q.07	HIGH	HIGH	HIGH	749.559	1890.78	2640.34
TCGA.BH.A1FD.01A.11R.A13Q.07	HIGH	LOW	LOW	574.192	282.494	856.686
TCGA.PL.A8LX.01A.11R.A41B.07	LOW	LOW	LOW	-333.565	375.566	42.0008
TCGA.A2.A0T3.01A.21R.A115.07	LOW	LOW	LOW	-259.305	-477.52	-736.826
TCGA.D8.A27W.01A.11R.A16F.07	HIGH	LOW	LOW	533.213	535.707	1068.92
TCGA.A7.A0DB.01A.11R.A277.07	HIGH	HIGH	HIGH	1184.14	716.122	1900.26
TCGA.BH.A0EA.01A.11R.A115.07	HIGH	LOW	HIGH	890.62	485.091	1375.71
TCGA.LL.A5YO.01A.21R.A28M.07	HIGH	HIGH	HIGH	746.089	2795.65	3541.74
TCGA.AN.A0AR.01A.11R.A00Z.07	LOW	LOW	LOW	-762.243	-386.724	-1148.97
TCGA.BH.A18V.01A.11R.A12D.07	HIGH	HIGH	HIGH	725.493	1281.78	2007.27
TCGA.AR.A2LE.01A.11R.A180.07	LOW	LOW	LOW	170.227	196.717	366.944
TCGA.A7.A4SE.01A.11R.A266.07	HIGH	LOW	LOW	681.849	306.08	987.928
TCGA.C8.A278.01A.11R.A169.07	HIGH	HIGH	HIGH	1207.89	1711.33	2919.21
TCGA.A8.A094.01A.11R.A00Z.07	HIGH	HIGH	HIGH	729.19	1565.53	2294.72
TCGA.LL.A73Z.01A.11R.A32P.07	HIGH	HIGH	HIGH	931.371	1346.58	2277.95
TCGA.E2.A10B.01A.11R.A10J.07	HIGH	LOW	LOW	591.342	427.278	1018.62
TCGA.BH.A0B8.01A.21R.A056.07	LOW	LOW	LOW	230.169	23.5901	253.759
TCGA.A2.A0YT.01A.11R.A109.07	LOW	LOW	LOW	-158.607	141.764	-16.843
TCGA.OL.A97C.01A.32R.A41B.07	LOW	HIGH	LOW	466.27	692.253	1158.52
TCGA.EW.A1PC.01B.11R.A21T.07	LOW	LOW	LOW	-367.01	-364.443	-731.453
TCGA.BH.A18M.01A.11R.A12D.07	HIGH	LOW	HIGH	1025.28	505.647	1530.93
TCGA.A8.A07S.01A.11R.A034.07	LOW	LOW	LOW	203.452	197.342	400.795
TCGA.E9.A3Q9.01A.11R.A21T.07	LOW	HIGH	HIGH	433.22	1074.71	1507.93
TCGA.AO.A1KO.01A.31R.A13Q.07	LOW	LOW	LOW	297.624	48.6849	346.309
TCGA.C8.A1HL.01A.11R.A137.07	HIGH	LOW	LOW	782.709	368.79	1151.5
TCGA.BH.A18S.01A.11R.A12D.07	LOW	LOW	LOW	-317.621	94.756	-222.865
TCGA.C8.A27A.01A.11R.A169.07	LOW	LOW	LOW	-490.208	-447.227	-937.435
TCGA.AC.A7VB.01A.11R.A352.07	LOW	LOW	LOW	-909.697	-888.523	-1798.22
TCGA.S3.AA15.01A.11R.A41B.07	HIGH	HIGH	HIGH	1375.67	2471.88	3847.56
TCGA.A7.A26J.01A.11R.A277.07	HIGH	LOW	LOW	653.34	341.225	994.565
TCGA.B6.A1KC.01B.11R.A157.07	LOW	LOW	LOW	-277.462	-308.16	-585.622
TCGA.AQ.A04J.01A.02R.A034.07	HIGH	HIGH	HIGH	978.02	1881.46	2859.48
TCGA.AN.A0AM.01A.11R.A034.07	LOW	HIGH	HIGH	339.652	899.282	1238.93
TCGA.EW.A2FV.01A.11R.A17B.07	HIGH	HIGH	HIGH	654.568	1080.28	1734.85
TCGA.D8.A142.01A.11R.A115.07	HIGH	HIGH	HIGH	979.435	790.561	1770
TCGA.AC.A3TM.01A.11R.A22K.07	LOW	HIGH	LOW	212.186	857.556	1069.74
TCGA.D8.A1XB.01A.11R.A14D.07	HIGH	LOW	LOW	889.16	-71.9726	817.187
TCGA.A2.A0EO.01A.11R.A034.07	HIGH	HIGH	HIGH	1266.31	950.253	2216.56
TCGA.A2.A1G4.01A.11R.A13Q.07	LOW	LOW	LOW	-345.629	155.668	-189.962
TCGA.AO.A0J6.01A.11R.A034.07	LOW	HIGH	LOW	-678.442	1309.75	631.312
TCGA.5L.AAT1.01A.12R.A41B.07	HIGH	HIGH	HIGH	987.498	2029.17	3016.67
TCGA.A8.A092.01A.11R.A00Z.07	LOW	LOW	LOW	208.222	167.602	375.823
TCGA.A2.A0CL.01A.11R.A115.07	HIGH	HIGH	HIGH	1367.38	2788.42	4155.8
TCGA.EW.A1J2.01A.21R.A13Q.07	HIGH	HIGH	HIGH	1232.62	1003.99	2236.61
TCGA.GM.A2DI.01A.31R.A18M.07	HIGH	HIGH	HIGH	1375.47	2646.15	4021.62
TCGA.AN.A0XV.01A.11R.A109.07	HIGH	LOW	HIGH	787.723	568.781	1356.5
TCGA.A8.A07E.01A.11R.A034.07	HIGH	HIGH	HIGH	1366.44	862.048	2228.48
TCGA.E9.A228.01A.31R.A157.07	LOW	LOW	LOW	31.2765	231.466	262.742
TCGA.A8.A08J.01A.11R.A00Z.07	HIGH	LOW	HIGH	726.749	463.78	1190.53
TCGA.PL.A8LV.01A.21R.A41B.07	LOW	HIGH	LOW	-33.1372	1016.16	983.023
TCGA.A2.A4RX.01A.11R.A266.07	HIGH	HIGH	HIGH	963.097	863.919	1827.02
TCGA.AR.A1AN.01A.11R.A12P.07	HIGH	LOW	HIGH	1130.43	603.683	1734.11
TCGA.A7.A26J.01B.02R.A277.07	HIGH	HIGH	HIGH	1073.46	944.722	2018.18
TCGA.A2.A0CR.01A.11R.A22K.07	HIGH	HIGH	HIGH	1066.2	2724.25	3790.45
TCGA.AO.A0JD.01A.11R.A056.07	LOW	LOW	LOW	-702.511	478.381	-224.131
TCGA.HN.A2NL.01A.11R.A18M.07	LOW	LOW	LOW	-812.191	609.17	-203.021
TCGA.A7.A3J0.01A.11R.A213.07	LOW	LOW	LOW	-639.185	388.955	-250.23
TCGA.AN.A0FX.01A.11R.A034.07	LOW	LOW	LOW	291.744	-202.675	89.0687
TCGA.AN.A04D.01A.21R.A034.07	LOW	LOW	LOW	-1092.06	-783.164	-1875.22
TCGA.B6.A0RI.01A.11R.A056.07	HIGH	LOW	LOW	771.179	301.347	1072.53
TCGA.OL.A5RX.01A.11R.A28M.07	LOW	LOW	LOW	280.497	543.55	824.047
TCGA.AO.A0J3.01A.11R.A034.07	LOW	LOW	LOW	-943.381	-412.054	-1355.44
TCGA.HN.A2OB.01A.21R.A27Q.07	HIGH	LOW	HIGH	1244.42	248.461	1492.88
TCGA.AN.A0FY.01A.11R.A034.07	LOW	LOW	LOW	463.41	-54.5467	408.863
TCGA.E9.A295.01A.11R.A16F.07	HIGH	LOW	LOW	545.649	227.494	773.143
TCGA.BH.A5J0.01A.11R.A27Q.07	HIGH	HIGH	HIGH	1159.94	1847.37	3007.31
TCGA.OL.A5D8.01A.11R.A27Q.07	LOW	LOW	LOW	27.5122	440.04	467.552
TCGA.D8.A1JP.01A.11R.A13Q.07	HIGH	HIGH	HIGH	1212.15	848.464	2060.62
TCGA.AC.A23G.01A.11R.A213.07	HIGH	HIGH	HIGH	1727.65	1067.57	2795.22
TCGA.E2.A14Y.01A.21R.A12D.07	LOW	LOW	LOW	-573.141	-50.8446	-623.986
TCGA.AC.A2BM.01A.11R.A21T.07	LOW	HIGH	LOW	99.9598	753.121	853.081
TCGA.C8.A3M7.01A.12R.A21T.07	HIGH	LOW	HIGH	753.108	537.807	1290.91
TCGA.D8.A145.01A.11R.A115.07	HIGH	LOW	HIGH	867.187	523.529	1390.72
TCGA.3C.AALI.01A.11R.A41B.07	LOW	HIGH	HIGH	236.33	1124.86	1361.19
TCGA.EW.A1IZ.01A.11R.A13Q.07	LOW	HIGH	HIGH	262.602	2414.86	2677.47
TCGA.E2.A15I.01A.21R.A137.07	LOW	HIGH	HIGH	382.869	900.549	1283.42
TCGA.D8.A1XG.01A.11R.A14D.07	LOW	LOW	LOW	-26.1772	-112.608	-138.786
TCGA.C8.A1HI.01A.11R.A137.07	LOW	LOW	LOW	297.859	62.905	360.764
TCGA.AR.A1AQ.01A.11R.A12P.07	LOW	HIGH	HIGH	492.27	1975.44	2467.71
TCGA.BH.A18K.01A.11R.A12D.07	HIGH	LOW	LOW	705.581	180.298	885.879
TCGA.D8.A1JM.01A.11R.A13Q.07	LOW	LOW	LOW	-1225.31	141.177	-1084.13
TCGA.D8.A27P.01A.11R.A16F.07	LOW	LOW	LOW	190.568	-252.002	-61.434
TCGA.BH.A8FZ.01A.11R.A352.07	HIGH	HIGH	HIGH	1102.87	1760.7	2863.56
TCGA.A8.A06R.01A.11R.A00Z.07	HIGH	HIGH	HIGH	1065.82	1042.98	2108.8
TCGA.BH.A18Q.01A.12R.A12D.07	LOW	HIGH	LOW	-11.0694	794.576	783.507
TCGA.A8.A09X.01A.11R.A00Z.07	HIGH	HIGH	HIGH	1119.03	1716.54	2835.56
TCGA.A2.A04N.01A.11R.A115.07	HIGH	LOW	LOW	862.307	196.836	1059.14
TCGA.E2.A14Q.01A.11R.A12D.07	LOW	LOW	LOW	198.371	180.545	378.915
TCGA.AO.A12E.01A.11R.A10J.07	HIGH	HIGH	HIGH	594.908	658.002	1252.91
TCGA.AR.A24W.01A.11R.A169.07	HIGH	LOW	LOW	711.542	-161.034	550.508
TCGA.A2.A0CT.01A.31R.A056.07	LOW	LOW	LOW	-161.084	-62.7453	-223.829
TCGA.B6.A0IN.01A.11R.A034.07	HIGH	HIGH	HIGH	1008.04	1507.07	2515.11
TCGA.A7.A13D.01B.04R.A277.07	LOW	LOW	LOW	92.8975	-667.162	-574.265
TCGA.EW.A2FR.01A.11R.A21T.07	HIGH	HIGH	HIGH	1617.97	752.58	2370.55
TCGA.D8.A1JD.01A.11R.A13Q.07	HIGH	HIGH	HIGH	1088.7	772.845	1861.55
TCGA.LL.A9Q3.01A.11R.A41B.07	LOW	HIGH	HIGH	334.03	900.372	1234.4
TCGA.D8.A1JC.01A.11R.A13Q.07	HIGH	HIGH	HIGH	607.695	636.673	1244.37
TCGA.B6.A0IB.01A.11R.A034.07	LOW	LOW	LOW	-661.077	-757.648	-1418.73
TCGA.LL.A440.01A.11R.A24H.07	HIGH	HIGH	HIGH	1655.03	1642.56	3297.59
TCGA.BH.A0BR.01A.21R.A115.07	HIGH	HIGH	HIGH	1387.53	1096.49	2484.01
TCGA.B6.A0RV.01A.11R.A084.07	LOW	HIGH	LOW	136.264	824.289	960.553
TCGA.AO.A0JC.01A.11R.A056.07	HIGH	HIGH	HIGH	717.403	3654.73	4372.14
TCGA.E9.A5UO.01A.11R.A28M.07	LOW	LOW	LOW	-1174.02	-790.97	-1964.99
TCGA.BH.A0HF.01A.11R.A056.07	HIGH	HIGH	HIGH	1092.69	1045.66	2138.35
TCGA.JL.A3YW.01A.12R.A239.07	HIGH	HIGH	HIGH	1543.46	1709.11	3252.57
TCGA.B6.A0I8.01A.11R.A034.07	LOW	LOW	LOW	196.186	-476.088	-279.902
TCGA.E2.A1II.01A.11R.A144.07	LOW	HIGH	HIGH	82.1823	2465.18	2547.36
TCGA.AN.A03X.01A.21R.A00Z.07	HIGH	HIGH	HIGH	1414.88	647.794	2062.67
TCGA.A8.A08I.01A.11R.A00Z.07	LOW	HIGH	HIGH	4.50565	2233.57	2238.07
TCGA.E9.A1NI.01A.11R.A14D.07	HIGH	LOW	LOW	725.215	173.486	898.701
TCGA.E2.A10F.01A.11R.A10J.07	HIGH	HIGH	HIGH	1313.82	1293.8	2607.63
TCGA.BH.A1FG.01A.11R.A13Q.07	LOW	LOW	LOW	-63.5711	103.842	40.2712
TCGA.A2.A04P.01A.31R.A034.07	LOW	HIGH	HIGH	382.901	1268.72	1651.62
TCGA.AR.A1AL.01A.21R.A12P.07	HIGH	HIGH	HIGH	985.287	620.727	1606.01
TCGA.AR.A2LQ.01A.22R.A18M.07	HIGH	HIGH	HIGH	1701.69	758.381	2460.07
TCGA.D8.A73W.01A.22R.A352.07	HIGH	HIGH	HIGH	949.075	1026.22	1975.3
TCGA.BH.A0W7.01A.11R.A115.07	HIGH	HIGH	HIGH	1181.13	1739.12	2920.25
TCGA.BH.A6R8.01A.21R.A33J.07	LOW	HIGH	LOW	-25.4817	904.874	879.392
TCGA.A8.A0A1.01A.11R.A00Z.07	HIGH	HIGH	HIGH	1125.86	1734.58	2860.43
TCGA.LD.A66U.01A.11R.A31O.07	HIGH	HIGH	HIGH	690.175	1400.2	2090.37
TCGA.BH.A0DO.01B.11R.A12D.07	LOW	LOW	LOW	178.862	-123.591	55.2711
TCGA.E2.A1LE.01A.12R.A19W.07	HIGH	HIGH	HIGH	1222.26	1489.82	2712.08
TCGA.AO.A125.01A.11R.A10J.07	LOW	LOW	LOW	-1405.54	-497.789	-1903.33
TCGA.AC.A23H.01A.11R.A157.07	LOW	LOW	LOW	209.008	-209.841	-0.833052
TCGA.A8.A08L.01A.11R.A00Z.07	LOW	HIGH	HIGH	161.739	1097.74	1259.48
TCGA.B6.A401.01A.11R.A239.07	LOW	HIGH	HIGH	460.058	966.754	1426.81
TCGA.3C.AAAU.01A.11R.A41B.07	LOW	LOW	LOW	-623.581	-512.706	-1136.29
TCGA.A7.A2KD.01A.31R.A21T.07	HIGH	HIGH	HIGH	929.97	1079.97	2009.94
TCGA.AR.A1AX.01A.11R.A12P.07	HIGH	HIGH	HIGH	921.129	2228.07	3149.2
TCGA.BH.A1F8.01A.11R.A13Q.07	LOW	LOW	LOW	308.323	102.612	410.935
TCGA.AO.A03T.01A.21R.A034.07	LOW	HIGH	LOW	-242.595	682.387	439.792
TCGA.E2.A1L8.01A.11R.A13Q.07	HIGH	LOW	LOW	732.784	439.52	1172.3
TCGA.A2.A0ER.01A.21R.A034.07	LOW	LOW	LOW	-162.832	148.884	-13.9484
TCGA.D8.A1JL.01A.11R.A13Q.07	HIGH	HIGH	HIGH	1014.1	1730.21	2744.31
TCGA.A8.A06Q.01A.11R.A034.07	LOW	LOW	LOW	-1012.21	-476.512	-1488.72
TCGA.AC.A6NO.01A.12R.A33J.07	LOW	LOW	LOW	-45.3794	-211.376	-256.755
TCGA.A2.A0YC.01A.11R.A109.07	HIGH	LOW	HIGH	672.264	560.299	1232.56
TCGA.E9.A1R6.01A.11R.A14D.07	LOW	LOW	LOW	160.077	-154.928	5.14973
TCGA.GM.A4E0.01A.12R.A266.07	HIGH	HIGH	HIGH	1586.87	1941.6	3528.47
TCGA.B6.A0IQ.01A.11R.A034.07	LOW	LOW	LOW	-636.812	410.411	-226.402
TCGA.E9.A1ND.01A.11R.A144.07	HIGH	HIGH	HIGH	667.766	2232.96	2900.73
TCGA.E2.A1IG.01A.11R.A144.07	HIGH	LOW	LOW	903.221	193.487	1096.71
TCGA.A2.A0CP.01A.11R.A034.07	HIGH	LOW	HIGH	1035.8	389.662	1425.46
TCGA.EW.A1J6.01A.11R.A13Q.07	LOW	HIGH	LOW	-105.9	1217.14	1111.24
TCGA.E2.A14R.01A.11R.A115.07	LOW	HIGH	LOW	-375.646	1383.13	1007.48
TCGA.EW.A1OV.01A.11R.A144.07	HIGH	HIGH	HIGH	947.751	2639.18	3586.93
TCGA.AR.A1AP.01A.11R.A12P.07	HIGH	HIGH	HIGH	611.8	823.325	1435.13
TCGA.A8.A09R.01A.11R.A00Z.07	HIGH	HIGH	HIGH	771.368	1007.94	1779.31
TCGA.D8.A1XQ.01A.11R.A14M.07	HIGH	HIGH	HIGH	626.109	1514.35	2140.46
TCGA.A8.A08Z.01A.21R.A00Z.07	HIGH	HIGH	HIGH	1532.51	1173.87	2706.38
TCGA.EW.A424.01A.11R.A24H.07	LOW	LOW	LOW	418.248	-329.632	88.6162
TCGA.B6.A409.01A.11R.A24H.07	LOW	LOW	LOW	-102.565	415.306	312.741
TCGA.D8.A27G.01A.11R.A16F.07	HIGH	HIGH	HIGH	1013.54	968.902	1982.45
TCGA.BH.A0C0.01A.21R.A056.07	LOW	HIGH	HIGH	402.906	2278.6	2681.5
TCGA.S3.AA14.01A.11R.A41B.07	HIGH	LOW	LOW	741.233	-109.721	631.512
TCGA.A8.A09V.01A.11R.A034.07	HIGH	LOW	LOW	584.036	-373.01	211.026
TCGA.A8.A08C.01A.11R.A00Z.07	LOW	LOW	LOW	-27.3263	-97.2665	-124.593
TCGA.E2.A1IJ.01A.11R.A144.07	HIGH	HIGH	HIGH	1528.36	1493.49	3021.85
TCGA.A2.A0ES.01A.11R.A115.07	HIGH	HIGH	HIGH	1041.32	703.031	1744.36
TCGA.AO.A12A.01A.21R.A115.07	HIGH	HIGH	HIGH	744.053	620.994	1365.05
TCGA.AN.A0XN.01A.21R.A109.07	HIGH	HIGH	HIGH	1751.93	1266.51	3018.44
TCGA.AO.A12B.01A.11R.A10J.07	LOW	LOW	LOW	-467.437	-47.6159	-515.053
TCGA.BH.A0E9.01B.11R.A115.07	LOW	LOW	LOW	378.617	501.206	879.823
TCGA.BH.A0BP.01A.11R.A115.07	HIGH	LOW	HIGH	1165.21	328.141	1493.35
TCGA.E2.A155.01A.11R.A12D.07	LOW	LOW	LOW	-497.345	-596.064	-1093.41
TCGA.A2.A0ET.01A.31R.A034.07	LOW	LOW	LOW	-683.871	428.567	-255.304
TCGA.BH.A0EE.01A.11R.A034.07	LOW	HIGH	LOW	-1081.17	745.322	-335.848
TCGA.E2.A10A.01A.21R.A115.07	LOW	LOW	LOW	216.302	253.954	470.256
TCGA.AO.A129.01A.21R.A10J.07	LOW	HIGH	HIGH	283.862	1571.56	1855.42
TCGA.B6.A1KN.01A.11R.A13Q.07	LOW	LOW	LOW	304.427	213.612	518.038
TCGA.AC.A3QQ.01B.06R.A22O.07	HIGH	HIGH	HIGH	1017.34	730.621	1747.96
TCGA.BH.A6R9.01A.21R.A32P.07	HIGH	HIGH	HIGH	2080.87	1938.28	4019.15
TCGA.E2.A15K.06A.11R.A12P.07	LOW	LOW	LOW	-1170.34	-151.207	-1321.55
TCGA.D8.A27I.01A.11R.A16F.07	HIGH	HIGH	HIGH	1348.68	1309.4	2658.08
TCGA.A7.A26H.01A.11R.A169.07	HIGH	HIGH	HIGH	1006.72	817.318	1824.04
TCGA.C8.A1HG.01A.11R.A137.07	LOW	HIGH	HIGH	486.071	1448.57	1934.64
TCGA.D8.A1JF.01A.11R.A13Q.07	HIGH	LOW	HIGH	794.616	528.153	1322.77
TCGA.E9.A1RH.01A.21R.A169.07	LOW	LOW	LOW	233.921	105.236	339.157
TCGA.BH.A0H0.01A.11R.A056.07	LOW	LOW	LOW	-456.491	-202.909	-659.401
TCGA.UU.A93S.01A.21R.A41B.07	LOW	LOW	LOW	-768.227	372.703	-395.524
TCGA.AR.A2LK.01A.11R.A180.07	HIGH	LOW	LOW	533.371	392.924	926.295
TCGA.E9.A229.01A.31R.A157.07	HIGH	HIGH	HIGH	1461.42	930.514	2391.93
TCGA.PE.A5DC.01A.12R.A27Q.07	LOW	LOW	LOW	-71.3508	94.162	22.8112
TCGA.AN.A046.01A.21R.A034.07	HIGH	HIGH	HIGH	896.651	1499.25	2395.9
TCGA.AN.A0FK.01A.11R.A034.07	LOW	LOW	LOW	60.2392	-15.7639	44.4752
TCGA.D8.A27M.01A.11R.A16F.07	HIGH	HIGH	HIGH	1143.3	2016.9	3160.2
TCGA.A2.A0YF.01A.21R.A109.07	LOW	LOW	LOW	183.156	616.102	799.257
TCGA.AO.A0J2.01A.11R.A034.07	LOW	HIGH	LOW	-192.371	1066.21	873.835
TCGA.C8.A135.01A.11R.A115.07	HIGH	HIGH	HIGH	697.249	821.331	1518.58
TCGA.A8.A075.01A.11R.A084.07	HIGH	HIGH	HIGH	589.331	980.46	1569.79
TCGA.A8.A093.01A.11R.A00Z.07	HIGH	LOW	LOW	630.492	-381.839	248.653
TCGA.D8.A4Z1.01A.21R.A266.07	HIGH	LOW	LOW	756.175	426.21	1182.38
TCGA.GI.A2C9.01A.11R.A21T.07	LOW	LOW	LOW	331.3	535.775	867.075
TCGA.LL.A50Y.01A.11R.A266.07	LOW	HIGH	LOW	53.2748	946.445	999.719
TCGA.E2.A1B4.01A.11R.A12P.07	LOW	LOW	LOW	-27.0257	-313.283	-340.309
TCGA.A7.A26G.01A.21R.A169.07	HIGH	HIGH	HIGH	1562.52	1350.29	2912.81
TCGA.AN.A049.01A.21R.A00Z.07	HIGH	HIGH	HIGH	774.866	775.534	1550.4
TCGA.A8.A095.01A.11R.A00Z.07	LOW	LOW	LOW	282.23	223.874	506.104
TCGA.EW.A1P3.01A.11R.A144.07	LOW	LOW	LOW	428.307	392.492	820.799
TCGA.D8.A27H.01A.11R.A16F.07	HIGH	LOW	LOW	632.169	280.796	912.965
TCGA.BH.A1FC.01A.11R.A13Q.07	LOW	HIGH	HIGH	-48.6005	1557.88	1509.28
TCGA.B6.A0WX.01A.11R.A109.07	HIGH	HIGH	HIGH	1005.92	908.8	1914.72
TCGA.D8.A143.01A.11R.A115.07	LOW	LOW	LOW	-369.755	563.428	193.673
TCGA.A8.A06X.01A.21R.A00Z.07	LOW	LOW	LOW	295.972	552.103	848.075
TCGA.D8.A1X8.01A.11R.A14M.07	HIGH	HIGH	HIGH	872.913	882.972	1755.88
TCGA.E2.A153.01A.12R.A12D.07	HIGH	HIGH	HIGH	1512.52	684.547	2197.07
TCGA.PL.A8LZ.01A.31R.A36F.07	HIGH	HIGH	HIGH	1162.09	2047.45	3209.54
TCGA.AC.A2FG.01A.11R.A17B.07	LOW	LOW	LOW	365.283	167.482	532.765
TCGA.AR.A252.01A.11R.A169.07	HIGH	HIGH	HIGH	1267.39	2438.87	3706.26
TCGA.A1.A0SE.01A.11R.A084.07	HIGH	LOW	LOW	622.618	-62.3893	560.229
TCGA.BH.A1EY.01A.11R.A13Q.07	HIGH	HIGH	HIGH	1320.09	1511	2831.1
TCGA.AC.A6IV.01A.12R.A33J.07	HIGH	HIGH	HIGH	1718.7	1856.62	3575.33
TCGA.D8.A1Y1.01A.21R.A14M.07	HIGH	HIGH	HIGH	1093.98	655.616	1749.6
TCGA.A1.A0SK.01A.12R.A084.07	LOW	LOW	LOW	-1397.61	-1290.93	-2688.55
TCGA.A8.A083.01A.21R.A00Z.07	LOW	LOW	LOW	-773.003	-201.198	-974.201
TCGA.E9.A1N3.01A.12R.A157.07	LOW	LOW	LOW	-539.328	-603.981	-1143.31
TCGA.AN.A04A.01A.21R.A034.07	HIGH	LOW	LOW	961.32	198.169	1159.49
TCGA.E9.A3X8.01A.31R.A22U.07	HIGH	HIGH	HIGH	944.739	1496.8	2441.54
TCGA.D8.A27N.01A.11R.A16F.07	HIGH	HIGH	HIGH	1187.31	1127.06	2314.37
TCGA.A2.A0D3.01A.11R.A115.07	LOW	LOW	LOW	-189.13	457.221	268.091
TCGA.B6.A0X4.01A.11R.A109.07	LOW	LOW	LOW	-1252.98	-970.691	-2223.67
TCGA.GM.A2DM.01A.11R.A180.07	LOW	HIGH	LOW	-327.1	634.296	307.195
TCGA.LL.A5YN.01A.11R.A28M.07	LOW	HIGH	HIGH	291.826	2357.5	2649.32
TCGA.E2.A1LB.01A.11R.A144.07	LOW	LOW	LOW	416.182	31.7821	447.964
TCGA.AQ.A1H2.01A.11R.A13Q.07	LOW	LOW	LOW	-146.324	275.012	128.687
TCGA.BH.A1EU.01A.11R.A137.07	HIGH	HIGH	HIGH	1490.41	1866.43	3356.84
TCGA.BH.A0B3.01A.11R.A056.07	HIGH	HIGH	HIGH	616.469	1333.43	1949.9
TCGA.A8.A0AB.01A.11R.A034.07	LOW	LOW	LOW	-222.903	-801.191	-1024.09
TCGA.AN.A0FD.01A.11R.A034.07	HIGH	LOW	HIGH	951.039	537.99	1489.03
TCGA.AR.A0TT.01A.31R.A084.07	HIGH	HIGH	HIGH	1286.6	2543.9	3830.5
TCGA.BH.A0GZ.01A.11R.A056.07	HIGH	LOW	LOW	670.836	133.316	804.152
TCGA.BH.A8FY.01A.11R.A36F.07	LOW	LOW	LOW	-681.593	173.426	-508.168
TCGA.BH.A18I.01A.11R.A12D.07	HIGH	HIGH	HIGH	1392.14	1238	2630.14
TCGA.E9.A1N4.01A.11R.A14M.07	HIGH	HIGH	HIGH	1015.72	1417.45	2433.16
TCGA.E9.A22A.01A.11R.A157.07	HIGH	HIGH	HIGH	1653.33	1559.01	3212.33
TCGA.AN.A0FN.01A.11R.A034.07	HIGH	HIGH	HIGH	2091.22	2141.29	4232.51
TCGA.S3.A6ZF.01A.32R.A32P.07	LOW	HIGH	LOW	303.641	795.966	1099.61
TCGA.OL.A66I.01A.21R.A29R.07	HIGH	HIGH	HIGH	992.287	2657.9	3650.19
TCGA.AC.A3W7.01A.11R.A22K.07	HIGH	LOW	LOW	557.54	153.557	711.097
TCGA.C8.A1HJ.01A.11R.A13Q.07	LOW	LOW	LOW	-256.861	126.935	-129.925
TCGA.A2.A4S0.01A.21R.A266.07	LOW	LOW	LOW	-502.551	-319.446	-821.997
TCGA.AQ.A04H.01B.11R.A10J.07	LOW	LOW	LOW	-142.011	-214.85	-356.861
TCGA.A2.A0CW.01A.21R.A115.07	LOW	LOW	LOW	-457.452	506.493	49.0414
TCGA.E2.A15T.01A.11R.A115.07	LOW	LOW	LOW	-648.902	-577.333	-1226.24
TCGA.E2.A14T.01A.11R.A115.07	LOW	LOW	LOW	-60.6201	288.567	227.947
TCGA.C8.A1HN.01A.11R.A137.07	LOW	LOW	LOW	33.0187	201.621	234.64
TCGA.A2.A25F.01A.11R.A169.07	HIGH	HIGH	HIGH	2036.03	3314.19	5350.22
TCGA.A8.A08G.01A.11R.A00Z.07	LOW	LOW	LOW	421.43	472.619	894.048
TCGA.A2.A04W.01A.31R.A115.07	HIGH	LOW	LOW	624.296	273.205	897.501
TCGA.BH.A1F0.01A.11R.A137.07	HIGH	HIGH	HIGH	1396.04	2485.88	3881.93
TCGA.AC.A6IX.01A.12R.A32P.07	HIGH	HIGH	HIGH	1140.3	971.713	2112.02
TCGA.BH.A28O.01A.11R.A22K.07	HIGH	LOW	HIGH	1084.6	518.73	1603.33
TCGA.AR.A5QP.01A.11R.A28M.07	HIGH	LOW	LOW	572.003	354.932	926.935
TCGA.A8.A08X.01A.21R.A00Z.07	HIGH	HIGH	HIGH	1090.3	1351.46	2441.76
TCGA.A7.A13E.01B.06R.A277.07	HIGH	HIGH	HIGH	1285.26	1515.62	2800.87
TCGA.A8.A08H.01A.21R.A00Z.07	HIGH	HIGH	HIGH	1925.29	2542.88	4468.17
TCGA.E2.A156.01A.11R.A12D.07	LOW	LOW	LOW	-717.27	-378.338	-1095.61
TCGA.EW.A1PE.01A.11R.A144.07	HIGH	HIGH	HIGH	963.996	1433.85	2397.84
TCGA.BH.A208.01A.11R.A157.07	HIGH	HIGH	HIGH	2047.06	733.787	2780.85
TCGA.A7.A13H.01A.11R.A22K.07	HIGH	HIGH	HIGH	741.029	1574.66	2315.69
TCGA.D8.A1XZ.01A.11R.A14M.07	HIGH	HIGH	HIGH	684.761	734.591	1419.35
TCGA.D8.A1XO.01A.11R.A14M.07	HIGH	HIGH	HIGH	1125.3	757.461	1882.76
TCGA.E9.A227.01A.11R.A157.07	HIGH	HIGH	HIGH	819.846	1357.49	2177.33
TCGA.EW.A1P6.01A.11R.A144.07	HIGH	LOW	LOW	601.335	-47.8386	553.496
TCGA.AN.A0XR.01A.11R.A109.07	LOW	LOW	LOW	-192.445	-329.888	-522.333
TCGA.AC.A62Y.01A.11R.A29R.07	HIGH	HIGH	HIGH	643.412	1266.37	1909.78
TCGA.GM.A2DC.01A.11R.A18M.07	LOW	LOW	LOW	-249.719	-21.4095	-271.129
TCGA.AR.A1AW.01A.21R.A12P.07	HIGH	HIGH	HIGH	1187.86	3071.21	4259.08
TCGA.A2.A0CZ.01A.11R.A034.07	HIGH	HIGH	HIGH	1454.8	1158.86	2613.67
TCGA.BH.A201.01A.11R.A14M.07	HIGH	LOW	LOW	881.829	-21.3955	860.434
TCGA.C8.A26Z.01A.11R.A16F.07	LOW	LOW	LOW	131.179	-411.934	-280.756
TCGA.E9.A24A.01A.11R.A169.07	HIGH	HIGH	HIGH	1150.17	1143.78	2293.96
TCGA.AC.A5EH.01A.11R.A28M.07	HIGH	HIGH	HIGH	1001.05	847.311	1848.36
TCGA.E2.A15G.01A.11R.A12D.07	LOW	LOW	LOW	-148.876	-70.1356	-219.011
TCGA.E2.A107.01A.11R.A10J.07	LOW	LOW	LOW	-482.505	-33.2167	-515.721
TCGA.A2.A0SW.01A.11R.A084.07	HIGH	HIGH	HIGH	794.674	1719.27	2513.94
TCGA.A7.A26F.01B.04R.A22O.07	HIGH	HIGH	HIGH	1302.39	1399.76	2702.15
TCGA.D8.A1X6.01A.11R.A14M.07	LOW	HIGH	LOW	269.545	887.476	1157.02
TCGA.AR.A254.01A.21R.A169.07	HIGH	HIGH	HIGH	1231.94	1531.57	2763.5
TCGA.E9.A1NG.01A.21R.A14M.07	HIGH	HIGH	HIGH	1876.91	1266.92	3143.83
TCGA.BH.A1FL.01A.11R.A13Q.07	LOW	LOW	LOW	153.55	-138.132	15.4186
TCGA.BH.A0E7.01A.11R.A034.07	LOW	LOW	LOW	45.4095	-496.485	-451.076
TCGA.B6.A3ZX.01A.11R.A239.07	LOW	HIGH	HIGH	205.597	2479.9	2685.5
TCGA.AO.A03L.01A.41R.A056.07	HIGH	HIGH	HIGH	758.418	692.951	1451.37
TCGA.AN.A0XW.01A.11R.A109.07	HIGH	HIGH	HIGH	1559.99	1784.37	3344.36
TCGA.E2.A1LL.01A.11R.A144.07	LOW	LOW	LOW	-484.435	-167.616	-652.051
TCGA.AN.A03Y.01A.21R.A00Z.07	LOW	LOW	LOW	55.2011	516.581	571.782
TCGA.A7.A3IY.01A.21R.A21T.07	HIGH	HIGH	HIGH	991.476	1356.51	2347.99
TCGA.BH.A1ET.01A.11R.A137.07	HIGH	LOW	LOW	637.964	387.631	1025.59
TCGA.BH.A18F.01A.11R.A12D.07	HIGH	HIGH	HIGH	972.734	831.604	1804.34
TCGA.AO.A03U.01B.21R.A10J.07	HIGH	HIGH	HIGH	1100.5	1964	3064.5
TCGA.A8.A07O.01A.11R.A00Z.07	LOW	HIGH	LOW	-233.485	755.518	522.032
TCGA.LL.A6FQ.01A.11R.A31O.07	LOW	LOW	LOW	26.4989	592.233	618.732
TCGA.AC.A3EH.01A.22R.A22K.07	LOW	LOW	LOW	243.221	258.297	501.518
TCGA.B6.A40B.01A.11R.A239.07	LOW	LOW	LOW	453.448	250.647	704.095
TCGA.A8.A07J.01A.11R.A00Z.07	HIGH	HIGH	HIGH	1706.14	1514.86	3221
TCGA.AO.A0JJ.01A.11R.A056.07	HIGH	HIGH	HIGH	1361.7	1687.75	3049.45
TCGA.AQ.A0Y5.01A.11R.A14M.07	HIGH	LOW	HIGH	1056.94	313.804	1370.75
TCGA.A7.A0CD.01A.11R.A00Z.07	LOW	LOW	LOW	75.4886	-299.948	-224.459
TCGA.A2.A0CX.01A.21R.A00Z.07	HIGH	HIGH	HIGH	1020.98	964.851	1985.83
TCGA.AC.A6IW.01A.12R.A33J.07	LOW	HIGH	HIGH	-116.158	2324.36	2208.2
TCGA.A1.A0SJ.01A.11R.A084.07	HIGH	LOW	LOW	547.311	160.496	707.808
TCGA.WT.AB44.01A.11R.A41B.07	HIGH	LOW	LOW	622.668	480.205	1102.87
TCGA.EW.A6SC.01A.12R.A32P.07	HIGH	HIGH	HIGH	1000.83	747.288	1748.12
TCGA.AR.A256.01A.11R.A169.07	LOW	LOW	LOW	-73.7637	379.993	306.229
TCGA.PE.A5DE.01A.11R.A27Q.07	HIGH	HIGH	HIGH	665.062	2547.23	3212.29
TCGA.A7.A0CH.01A.21R.A00Z.07	LOW	LOW	LOW	349.061	-30.4438	318.617
TCGA.AC.A3HN.01A.11R.A213.07	HIGH	HIGH	HIGH	1416.7	1277.72	2694.42
TCGA.A2.A3KD.01A.12R.A213.07	LOW	LOW	LOW	262.972	230.241	493.214
TCGA.E2.A1BC.01A.11R.A12P.07	HIGH	LOW	LOW	886.915	-199.202	687.713
TCGA.AC.A8OR.01A.21R.A41B.07	LOW	LOW	LOW	-928.128	213.215	-714.912
TCGA.BH.A1EO.01A.11R.A137.07	HIGH	HIGH	HIGH	1750.99	1095.44	2846.43
TCGA.3C.AALJ.01A.31R.A41B.07	LOW	HIGH	HIGH	513.583	1119.13	1632.72
TCGA.BH.A209.01A.11R.A157.07	HIGH	HIGH	HIGH	541.408	2371.44	2912.84
TCGA.E9.A1RC.01A.11R.A157.07	LOW	LOW	LOW	-79.1409	-524.747	-603.888
TCGA.OL.A5S0.01A.11R.A28M.07	HIGH	HIGH	HIGH	764.394	1246.53	2010.93
TCGA.E2.A105.01A.11R.A10J.07	LOW	LOW	LOW	-478.323	-396.658	-874.981
TCGA.E2.A3DX.01A.21R.A213.07	HIGH	HIGH	HIGH	1503.56	1965.67	3469.22
TCGA.LL.A442.01A.11R.A24H.07	LOW	LOW	LOW	-314.245	577.336	263.092
TCGA.GM.A2DH.01A.11R.A180.07	LOW	HIGH	HIGH	-41.6608	1595.33	1553.67
TCGA.BH.A0B7.01A.12R.A115.07	HIGH	HIGH	HIGH	1042.08	1666.47	2708.54
TCGA.AR.A255.01A.11R.A169.07	HIGH	HIGH	HIGH	1154.27	940.051	2094.32
TCGA.A7.A26E.01A.11R.A169.07	HIGH	LOW	LOW	890.169	165.927	1056.1
TCGA.A2.A3XX.01A.21R.A239.07	LOW	HIGH	LOW	82.3079	757.231	839.538
TCGA.BH.A1F5.01A.12R.A13Q.07	LOW	LOW	LOW	113.528	-260.306	-146.779
TCGA.A2.A3XZ.01A.42R.A239.07	LOW	HIGH	HIGH	99.9902	1864.07	1964.06
TCGA.Z7.A8R6.01A.11R.A41B.07	LOW	LOW	LOW	-93.6167	157.428	63.8111
TCGA.A2.A3XU.01A.12R.A22U.07	LOW	LOW	LOW	-1122.67	-681.287	-1803.96
TCGA.A2.A0T4.01A.31R.A084.07	HIGH	HIGH	HIGH	1215.8	1210.34	2426.13
TCGA.E2.A1IK.01A.11R.A144.07	LOW	HIGH	LOW	-138.281	1159.04	1020.76
TCGA.A8.A09T.01A.11R.A00Z.07	HIGH	LOW	LOW	559.946	315.128	875.074
TCGA.E2.A1B6.01A.31R.A12P.07	LOW	HIGH	HIGH	83.2042	2785.9	2869.1
TCGA.AR.A24O.01A.11R.A169.07	HIGH	HIGH	HIGH	1592	1150.25	2742.26
TCGA.BH.A1FR.01A.11R.A13Q.07	LOW	HIGH	LOW	23.5943	650.372	673.966
TCGA.E9.A1N5.01A.11R.A14D.07	HIGH	HIGH	HIGH	1137.83	1059.37	2197.19
TCGA.E2.A572.01A.13R.A31O.07	LOW	LOW	LOW	-606.127	126.394	-479.733
TCGA.AO.A0JE.01A.11R.A056.07	HIGH	HIGH	HIGH	1494.11	1718.19	3212.3
TCGA.A8.A06N.01A.11R.A00Z.07	LOW	LOW	LOW	-1505.61	-547.921	-2053.53
TCGA.A2.A0T7.01A.21R.A084.07	HIGH	LOW	HIGH	759.944	443.594	1203.54
TCGA.A7.A13D.01A.13R.A277.07	LOW	LOW	LOW	44.1159	-405.506	-361.39
TCGA.GM.A2DK.01A.21R.A180.07	HIGH	HIGH	HIGH	821.841	921.723	1743.56
TCGA.AR.A0TZ.01A.12R.A084.07	LOW	LOW	LOW	92.9638	-154.408	-61.4439
TCGA.AO.A12G.01A.11R.A10J.07	HIGH	LOW	LOW	735.401	395.713	1131.11
TCGA.GM.A3XN.01A.12R.A22U.07	HIGH	HIGH	HIGH	1209.81	1097.27	2307.09
TCGA.EW.A1IY.01A.11R.A13Q.07	HIGH	HIGH	HIGH	1191.76	1591.9	2783.65
TCGA.AN.A0XT.01A.11R.A109.07	LOW	LOW	LOW	112.688	-98.7186	13.9692
TCGA.E2.A15R.01A.11R.A115.07	LOW	LOW	LOW	-515.485	-878.712	-1394.2
TCGA.AR.A0U4.01A.11R.A109.07	HIGH	HIGH	HIGH	639.636	2146.43	2786.07
TCGA.E2.A15H.01A.11R.A12D.07	LOW	LOW	LOW	129.126	-167.462	-38.3369
TCGA.C8.A1HO.01A.11R.A13Q.07	LOW	LOW	LOW	-131.247	-232.53	-363.777
TCGA.B6.A0IE.01A.11R.A034.07	LOW	LOW	LOW	92.6511	-72.8755	19.7757
TCGA.AQ.A1H3.01A.31R.A13Q.07	HIGH	HIGH	HIGH	828.589	692.739	1521.33
TCGA.LL.A7SZ.01A.32R.A352.07	HIGH	HIGH	HIGH	548.437	2013.12	2561.55
TCGA.AN.A0FZ.01A.11R.A034.07	LOW	LOW	LOW	157.793	-388.797	-231.003
TCGA.AN.A0AT.01A.11R.A034.07	LOW	LOW	LOW	-469.239	506.664	37.425
TCGA.BH.A0BC.01A.22R.A084.07	HIGH	HIGH	HIGH	1110.92	1509.47	2620.39
TCGA.E9.A22H.01A.11R.A157.07	LOW	LOW	LOW	-76.89	461.993	385.103
TCGA.A2.A0YL.01A.21R.A109.07	HIGH	HIGH	HIGH	887.185	704.669	1591.85
TCGA.AO.A0JB.01A.11R.A32Y.07	LOW	HIGH	LOW	312.698	622.255	934.953
TCGA.AC.A2FM.01A.11R.A19W.07	LOW	LOW	LOW	-86.9944	-499.128	-586.122
TCGA.BH.A0E1.01A.11R.A056.07	LOW	LOW	LOW	264.171	-203.348	60.8225
TCGA.AC.A23E.01A.11R.A157.07	HIGH	HIGH	HIGH	1597.91	709.062	2306.97
TCGA.A2.A04Q.01A.21R.A034.07	HIGH	HIGH	HIGH	1008.29	2750.22	3758.51
TCGA.AN.A0FW.01A.11R.A034.07	LOW	LOW	LOW	383.546	230.826	614.372
TCGA.B6.A402.01A.11R.A239.07	LOW	LOW	LOW	-421.436	-371.592	-793.028
TCGA.C8.A26Y.01A.11R.A16F.07	LOW	LOW	LOW	-662.938	505.395	-157.543
TCGA.AC.A2FF.01A.11R.A17B.07	HIGH	HIGH	HIGH	1614.19	1455.08	3069.27
TCGA.E2.A15F.01A.11R.A115.07	LOW	LOW	LOW	-105.402	127.611	22.2092
TCGA.AO.A03R.01A.21R.A034.07	LOW	HIGH	HIGH	97.8219	1230.11	1327.94
TCGA.BH.A0DL.01A.11R.A115.07	LOW	HIGH	HIGH	112.57	1890.3	2002.87
TCGA.AQ.A7U7.01A.22R.A352.07	HIGH	HIGH	HIGH	1606.07	2591.97	4198.04
TCGA.AR.A0TV.01A.21R.A084.07	LOW	HIGH	LOW	-187.31	1261.15	1073.84
TCGA.AR.A0TQ.01A.11R.A084.07	LOW	HIGH	HIGH	305.574	1206.15	1511.72
TCGA.A2.A0SV.01A.11R.A084.07	HIGH	HIGH	HIGH	834.915	1168.23	2003.15
TCGA.D8.A1X7.01A.11R.A14M.07	LOW	LOW	LOW	429.024	69.6215	498.646
TCGA.GM.A2DL.01A.11R.A18M.07	HIGH	HIGH	HIGH	1185.02	773.602	1958.62
TCGA.D8.A1JN.01A.11R.A13Q.07	LOW	LOW	LOW	-919.208	111.379	-807.829
TCGA.C8.A137.01A.11R.A115.07	LOW	LOW	LOW	102.758	-616.985	-514.227
TCGA.AR.A24X.01A.11R.A169.07	HIGH	LOW	LOW	560.301	184.475	744.776
TCGA.C8.A12K.01A.21R.A115.07	HIGH	HIGH	HIGH	547.872	2404.52	2952.39
TCGA.A8.A084.01A.21R.A00Z.07	LOW	LOW	LOW	147.973	-154.485	-6.51217
TCGA.A2.A3XV.01A.21R.A239.07	LOW	LOW	LOW	221.076	445.372	666.448
TCGA.EW.A1J1.01A.11R.A13Q.07	LOW	HIGH	LOW	74.5857	916.792	991.378
TCGA.AO.A12D.01A.11R.A115.07	HIGH	HIGH	HIGH	1144.76	1690.88	2835.64
TCGA.BH.A0DI.01A.21R.A12P.07	HIGH	HIGH	HIGH	1534.32	1098.76	2633.09
TCGA.EW.A6SB.01A.12R.A32P.07	LOW	HIGH	HIGH	-453.179	2272.46	1819.28
TCGA.E2.A10C.01A.21R.A10J.07	LOW	HIGH	HIGH	161.092	1274.62	1435.71
TCGA.GM.A3XG.01A.31R.A24H.07	LOW	LOW	LOW	-129.947	-242.927	-372.874
TCGA.AR.A5QN.01A.12R.A28M.07	HIGH	HIGH	HIGH	626.951	659.26	1286.21
TCGA.AO.A0JG.01A.31R.A084.07	HIGH	HIGH	HIGH	623.661	1262.14	1885.81
TCGA.B6.A1KI.01A.11R.A14M.07	HIGH	LOW	LOW	638.616	-412.101	226.515
TCGA.E9.A2JT.01A.22R.A18M.07	HIGH	HIGH	HIGH	1003.58	3131.28	4134.86
TCGA.A8.A07B.01A.11R.A00Z.07	HIGH	LOW	LOW	564.49	1.23296	565.723
TCGA.E2.A14N.01A.31R.A137.07	LOW	HIGH	LOW	-634.834	859.929	225.096
TCGA.E9.A2JS.01A.11R.A180.07	LOW	LOW	LOW	225.614	14.5735	240.188
TCGA.AC.A3W5.01A.11R.A22K.07	HIGH	HIGH	HIGH	1453.96	1771.21	3225.18
TCGA.BH.A0DV.01A.21R.A12P.07	HIGH	HIGH	HIGH	1796.79	931.964	2728.76
TCGA.OL.A66P.01A.11R.A31O.07	HIGH	HIGH	HIGH	1078.85	2640.42	3719.27
TCGA.BH.A0HA.01A.11R.A12P.07	HIGH	HIGH	HIGH	1344.02	1158.76	2502.79
TCGA.B6.A0RE.01A.11R.A056.07	LOW	LOW	LOW	-236.722	109.951	-126.772
TCGA.LL.A5YM.01A.11R.A28M.07	LOW	LOW	LOW	136.631	519.116	655.748
TCGA.E9.A1NA.01A.11R.A144.07	HIGH	HIGH	HIGH	936.22	987.864	1924.08
TCGA.B6.A0RH.01A.21R.A115.07	HIGH	LOW	LOW	647.169	277.599	924.767
TCGA.AO.A03M.01B.11R.A10J.07	LOW	HIGH	HIGH	325.653	1513.4	1839.05
TCGA.A7.A426.01A.22R.A24H.07	HIGH	LOW	HIGH	656	567.983	1223.98
TCGA.A2.A0CV.01A.31R.A115.07	HIGH	HIGH	HIGH	928.468	996.015	1924.48
TCGA.A1.A0SN.01A.11R.A144.07	HIGH	HIGH	HIGH	866.263	1101.94	1968.2
TCGA.A7.A0D9.01A.31R.A056.07	LOW	LOW	LOW	84.2469	-477.383	-393.136
TCGA.E9.A6HE.01A.11R.A31O.07	HIGH	HIGH	HIGH	724.866	877.225	1602.09
TCGA.E2.A108.01A.13R.A10J.07	HIGH	HIGH	HIGH	1946.04	2682.39	4628.43
TCGA.LD.A7W6.01A.81R.A352.07	LOW	LOW	LOW	249.295	412.315	661.611
TCGA.BH.A1ES.01A.11R.A137.07	LOW	LOW	LOW	414.825	-644.87	-230.045
TCGA.D8.A1JU.01A.11R.A13Q.07	HIGH	HIGH	HIGH	1775.57	1045	2820.57
TCGA.A2.A1G6.01A.11R.A13Q.07	HIGH	LOW	LOW	567.539	595.138	1162.68
TCGA.BH.A0EI.01A.11R.A115.07	HIGH	LOW	LOW	852.838	-249.317	603.521
TCGA.A2.A0T6.01A.11R.A084.07	HIGH	HIGH	HIGH	1651.84	1397.34	3049.18
TCGA.AC.A3QP.01A.11R.A22U.07	HIGH	HIGH	HIGH	1075.09	1309.41	2384.5
TCGA.A1.A0SP.01A.11R.A084.07	LOW	HIGH	LOW	-15.6456	1060.01	1044.36
TCGA.E9.A1RI.01A.11R.A169.07	HIGH	LOW	HIGH	1266.11	427.597	1693.71
TCGA.A8.A08R.01A.11R.A034.07	HIGH	HIGH	HIGH	568.72	1458.99	2027.71
TCGA.AN.A0FS.01A.11R.A034.07	HIGH	LOW	LOW	882.799	-49.3318	833.467
TCGA.BH.A8G0.01A.11R.A352.07	HIGH	HIGH	HIGH	1329.13	1777.34	3106.48
TCGA.C8.A12O.01A.11R.A115.07	HIGH	HIGH	HIGH	1172.61	837.631	2010.24
TCGA.AR.A1AK.01A.21R.A12P.07	HIGH	HIGH	HIGH	1081.38	1654.79	2736.18
TCGA.D8.A1JA.01A.11R.A13Q.07	HIGH	LOW	LOW	742.472	290.178	1032.65
TCGA.A8.A090.01A.11R.A00Z.07	HIGH	HIGH	HIGH	692.09	800.555	1492.64
TCGA.A8.A09D.01A.11R.A00Z.07	HIGH	HIGH	HIGH	1502.93	994.84	2497.77
TCGA.BH.A0BD.01A.11R.A034.07	HIGH	HIGH	HIGH	757.436	1099.7	1857.14
TCGA.A2.A3XT.01A.11R.A22U.07	LOW	HIGH	HIGH	297.313	1692.1	1989.41
TCGA.AN.A0AJ.01A.11R.A00Z.07	LOW	HIGH	HIGH	365.185	1393.84	1759.03
TCGA.A7.A4SF.01A.11R.A266.07	LOW	LOW	LOW	-130.655	325.328	194.673
TCGA.A2.A0T0.01A.22R.A084.07	LOW	LOW	LOW	398.693	529.742	928.435
TCGA.BH.A0AW.01A.11R.A056.07	HIGH	HIGH	HIGH	1136.81	2225.7	3362.51
TCGA.AO.A03P.01A.11R.A00Z.07	LOW	LOW	LOW	89.539	-33.6642	55.8748
TCGA.D8.A1X5.01A.11R.A14D.07	HIGH	HIGH	HIGH	779.164	760.785	1539.95
TCGA.B6.A0RT.01A.21R.A084.07	HIGH	HIGH	HIGH	951.475	3107.21	4058.68
TCGA.LL.A73Y.01A.11R.A33J.07	HIGH	HIGH	HIGH	726.276	1110.64	1836.91
TCGA.A2.A0CO.01A.13R.A22K.07	HIGH	HIGH	HIGH	1125.49	1903.99	3029.48
TCGA.AR.A0TP.01A.11R.A084.07	LOW	LOW	LOW	-606.742	-668.4	-1275.14
TCGA.AO.A128.01A.11R.A10J.07	HIGH	HIGH	HIGH	629.66	3039.54	3669.2
TCGA.AN.A0XU.01A.11R.A109.07	LOW	HIGH	LOW	-599.605	673.717	74.112
TCGA.E2.A1IH.01A.11R.A13Q.07	HIGH	HIGH	HIGH	1650.36	1989.77	3640.13
TCGA.A7.A6VW.01A.21R.A33J.07	LOW	HIGH	LOW	-30.7968	849.086	818.289
TCGA.OL.A66H.01A.11R.A29R.07	HIGH	HIGH	HIGH	604.279	1380.13	1984.41
TCGA.BH.A204.01A.11R.A157.07	LOW	LOW	LOW	241.44	-462.016	-220.576
TCGA.BH.A0BZ.01A.31R.A12P.07	HIGH	HIGH	HIGH	1297.77	1782.14	3079.91
TCGA.E9.A247.01A.11R.A169.07	LOW	LOW	LOW	-280.59	-433.867	-714.457
TCGA.AC.A23C.01A.12R.A169.07	HIGH	HIGH	HIGH	737.522	870.433	1607.95
TCGA.GM.A5PX.01A.12R.A28M.07	HIGH	LOW	HIGH	970.664	534.649	1505.31
TCGA.A7.A0CE.01A.11R.A00Z.07	LOW	LOW	LOW	-369.508	-39.1208	-408.629
TCGA.OL.A5RY.01A.21R.A28M.07	HIGH	HIGH	HIGH	1334.05	2369.84	3703.89
TCGA.LD.A74U.01A.13R.A33J.07	HIGH	HIGH	HIGH	1142.1	1031.75	2173.85
TCGA.B6.A408.01A.12R.A24H.07	HIGH	HIGH	HIGH	707.279	1345.74	2053.02
TCGA.AR.A24R.01A.11R.A169.07	LOW	HIGH	LOW	347.098	635.246	982.345
TCGA.EW.A1P5.01A.11R.A144.07	LOW	HIGH	LOW	180.833	963.948	1144.78
TCGA.BH.A0BM.01A.11R.A056.07	HIGH	LOW	LOW	756.2	231.022	987.223
TCGA.B6.A0RM.01A.11R.A084.07	LOW	LOW	LOW	-379.505	-357.723	-737.228
TCGA.5T.A9QA.01A.11R.A41B.07	LOW	LOW	LOW	-1451.35	-359.446	-1810.8
TCGA.EW.A1P8.01A.11R.A144.07	LOW	HIGH	HIGH	271.304	1383.51	1654.81
TCGA.E2.A15A.06A.11R.A12D.07	LOW	HIGH	HIGH	340.457	1705.41	2045.87
TCGA.3C.AALK.01A.11R.A41B.07	HIGH	LOW	HIGH	904.917	564.307	1469.22
TCGA.C8.A12U.01A.11R.A115.07	LOW	HIGH	LOW	-782.221	883.645	101.424
TCGA.E9.A22G.01A.11R.A157.07	LOW	LOW	LOW	-938.576	118.85	-819.726
TCGA.A2.A0EQ.01A.11R.A034.07	LOW	HIGH	HIGH	382.849	2292.32	2675.17
TCGA.BH.A1FB.01A.11R.A13Q.07	HIGH	HIGH	HIGH	1336.34	1752.11	3088.45
TCGA.BH.A1FE.06A.11R.A213.07	HIGH	LOW	HIGH	1163.36	480.751	1644.11
TCGA.E9.A248.01A.11R.A169.07	LOW	HIGH	HIGH	419.453	2057.61	2477.06
TCGA.A8.A0A6.01A.12R.A056.07	HIGH	HIGH	HIGH	728.979	1811.79	2540.77
TCGA.LL.A7T0.01A.31R.A352.07	LOW	HIGH	LOW	18.5434	677.715	696.259
TCGA.EW.A1P4.01A.21R.A144.07	LOW	HIGH	HIGH	160.08	1560.36	1720.44
TCGA.C8.A3M8.01A.11R.A213.07	LOW	LOW	LOW	189.906	-252.686	-62.7806
TCGA.AC.A5XS.01A.11R.A29R.07	HIGH	HIGH	HIGH	821.759	1613.91	2435.67
TCGA.BH.A0AU.01A.11R.A12P.07	HIGH	LOW	HIGH	676.975	517.311	1194.29
TCGA.EW.A1P1.01A.31R.A14D.07	HIGH	HIGH	HIGH	1651.56	1497.79	3149.35
TCGA.E9.A22E.01A.11R.A157.07	HIGH	HIGH	HIGH	1888.16	1179.22	3067.38
TCGA.OL.A5RV.01A.12R.A28M.07	LOW	LOW	LOW	42.371	-94.3456	-51.9747
TCGA.BH.A0BL.01A.11R.A115.07	HIGH	HIGH	HIGH	1487.65	1730.85	3218.5
TCGA.AR.A24Q.01A.12R.A169.07	HIGH	HIGH	HIGH	826.532	927.431	1753.96
TCGA.AR.A24Z.01A.11R.A169.07	LOW	LOW	LOW	-107.654	82.4588	-25.1953
TCGA.A2.A3XY.01A.11R.A239.07	HIGH	HIGH	HIGH	1094.47	1553.52	2647.99
TCGA.EW.A6S9.01A.22R.A33J.07	HIGH	LOW	LOW	621.754	98.1436	719.897
TCGA.BH.A0HX.01A.21R.A056.07	HIGH	LOW	LOW	651.039	336.361	987.401
TCGA.BH.A0C3.01A.21R.A12P.07	HIGH	HIGH	HIGH	1321.52	1207.91	2529.43
TCGA.D8.A1XF.01A.11R.A14D.07	LOW	LOW	LOW	-838.821	-416.453	-1255.27
TCGA.E2.A15E.01A.11R.A12D.07	LOW	LOW	LOW	223.035	-438.822	-215.787
TCGA.AR.A5QM.01A.11R.A27Q.07	HIGH	HIGH	HIGH	936.863	1074.62	2011.48
TCGA.JL.A3YX.01A.11R.A22U.07	LOW	LOW	LOW	-53.849	-303.649	-357.498
TCGA.AC.A3OD.01B.06R.A22O.07	HIGH	HIGH	HIGH	1083.28	2151.25	3234.53
TCGA.BH.A0BF.01A.21R.A12P.07	HIGH	HIGH	HIGH	1757.83	2355.78	4113.61
TCGA.BH.A2L8.01A.11R.A18M.07	HIGH	HIGH	HIGH	956.922	2054.93	3011.85
TCGA.AC.A2FB.01A.11R.A17B.07	HIGH	HIGH	HIGH	910.864	2380.19	3291.06
TCGA.A7.A425.01A.11R.A24H.07	HIGH	HIGH	HIGH	773.298	947.798	1721.1
TCGA.D8.A13Z.01A.11R.A115.07	HIGH	HIGH	HIGH	637.206	1160.86	1798.07
TCGA.AR.A24N.01A.11R.A169.07	HIGH	LOW	LOW	538.245	142.38	680.624
TCGA.BH.A0E2.01A.11R.A056.07	HIGH	LOW	LOW	725.866	342.746	1068.61
TCGA.AR.A0TR.01A.11R.A084.07	LOW	LOW	LOW	-1215.66	-109.411	-1325.07
TCGA.BH.A1FU.01A.11R.A14D.07	HIGH	HIGH	HIGH	1196.68	999.973	2196.65
TCGA.C8.A1HM.01A.12R.A137.07	LOW	HIGH	HIGH	23.5494	2159.57	2183.12
TCGA.AQ.A54N.01A.11R.A266.07	LOW	LOW	LOW	-1418.31	31.4592	-1386.85
TCGA.A2.A0YE.01A.11R.A109.07	LOW	LOW	LOW	-21.6018	-264.069	-285.67
TCGA.XX.A89A.01A.11R.A36F.07	HIGH	HIGH	HIGH	1751.52	1715.17	3466.69
TCGA.AR.A1AJ.01A.21R.A12P.07	HIGH	HIGH	HIGH	1234.92	2623.07	3858
TCGA.AN.A0FV.01A.11R.A00Z.07	LOW	LOW	LOW	484.471	-164.796	319.676
TCGA.C8.A12Q.01A.11R.A115.07	HIGH	HIGH	HIGH	741.353	758.997	1500.35
TCGA.E9.A22D.01A.11R.A157.07	HIGH	HIGH	HIGH	628.136	2541.83	3169.97
TCGA.E2.A109.01A.11R.A10J.07	LOW	LOW	LOW	275.681	174.77	450.451
TCGA.GM.A2DO.01A.11R.A18M.07	LOW	HIGH	HIGH	205.569	3056.83	3262.4
TCGA.BH.A0DG.01A.21R.A12P.07	HIGH	HIGH	HIGH	1386.34	1158.78	2545.12
TCGA.B6.A0IK.01A.12R.A056.07	LOW	LOW	LOW	15.0734	397.401	412.475
TCGA.EW.A3E8.01B.11R.A24H.07	HIGH	HIGH	HIGH	898.507	1695.18	2593.69
TCGA.E2.A14P.01A.31R.A12D.07	LOW	HIGH	LOW	-394.162	659.819	265.657
TCGA.OL.A5RZ.01A.11R.A28M.07	LOW	LOW	LOW	-484.149	-342.828	-826.978
TCGA.E2.A15S.01A.11R.A115.07	LOW	LOW	LOW	-869.615	-821.1	-1690.72
TCGA.C8.A1HE.01A.11R.A13Q.07	LOW	LOW	LOW	139.191	217.7	356.891
TCGA.E2.A1LK.01A.21R.A14D.07	LOW	LOW	LOW	-1038.57	120.78	-917.786
TCGA.A8.A06Y.01A.21R.A00Z.07	LOW	LOW	LOW	-837.684	-562.841	-1400.52
TCGA.BH.A1FE.01A.11R.A13Q.07	HIGH	HIGH	HIGH	1174.69	1547.42	2722.11
TCGA.E9.A3HO.01A.11R.A213.07	LOW	HIGH	LOW	-143.414	803.002	659.588
TCGA.A2.A3Y0.01A.11R.A239.07	LOW	HIGH	LOW	-345.081	1407.64	1062.56
TCGA.E9.A1RB.01A.11R.A157.07	LOW	LOW	LOW	24.4501	139.188	163.638
TCGA.BH.A0BT.01A.11R.A12P.07	LOW	LOW	LOW	393.3	512.117	905.418
TCGA.BH.A0B5.01A.11R.A12P.07	HIGH	HIGH	HIGH	630.879	734.469	1365.35
TCGA.A2.A0CU.01A.12R.A034.07	LOW	LOW	LOW	249.181	-170.014	79.1673
TCGA.B6.A0RN.01A.12R.A084.07	HIGH	LOW	LOW	671.876	-196.61	475.266
TCGA.GM.A2DN.01A.11R.A180.07	HIGH	HIGH	HIGH	675.278	1934.2	2609.48
TCGA.S3.A6ZH.01A.22R.A32P.07	LOW	LOW	LOW	-463.069	171.276	-291.793
TCGA.A2.A0CK.01A.11R.A22K.07	LOW	HIGH	HIGH	518.266	691.693	1209.96
TCGA.BH.A0BQ.01A.21R.A115.07	HIGH	HIGH	HIGH	1130.43	1056.4	2186.82
TCGA.BH.A0DK.01A.21R.A056.07	HIGH	HIGH	HIGH	1374	1927.9	3301.91
TCGA.BH.A42V.01A.11R.A24H.07	HIGH	HIGH	HIGH	773.826	910.089	1683.92
TCGA.A8.A07I.01A.11R.A00Z.07	HIGH	HIGH	HIGH	1018.64	788.057	1806.7
TCGA.E9.A54Y.01A.11R.A466.07	LOW	LOW	LOW	-1122.94	115.86	-1007.08
TCGA.MS.A51U.01A.31R.A266.07	HIGH	HIGH	HIGH	805.58	648.204	1453.78
TCGA.B6.A40C.01A.11R.A239.07	HIGH	HIGH	HIGH	783.4	621.224	1404.62
TCGA.A8.A091.01A.11R.A00Z.07	LOW	LOW	LOW	179.26	93.5685	272.828
TCGA.AC.A2B8.01A.11R.A17B.07	HIGH	HIGH	HIGH	1272.01	1150.61	2422.62
TCGA.C8.A12Z.01A.11R.A115.07	LOW	LOW	LOW	-88.3569	-329.13	-417.487
TCGA.A8.A07G.01A.11R.A034.07	HIGH	LOW	HIGH	1190.27	587.554	1777.83
TCGA.C8.A132.01A.31R.A115.07	HIGH	HIGH	HIGH	1079.92	1483.06	2562.98
TCGA.A8.A08P.01A.11R.A00Z.07	HIGH	HIGH	HIGH	1045.53	1797.32	2842.85
TCGA.AO.A12H.01A.11R.A115.07	LOW	LOW	LOW	-67.8328	143.489	75.6564
TCGA.D8.A1XL.01A.11R.A14M.07	LOW	HIGH	HIGH	213.871	1656.51	1870.38
TCGA.BH.A0EB.01A.11R.A034.07	HIGH	HIGH	HIGH	1283.69	1512.36	2796.05
TCGA.OL.A66L.01A.12R.A31O.07	HIGH	HIGH	HIGH	898.266	1368.8	2267.07
TCGA.BH.A5IZ.01A.11R.A27Q.07	LOW	LOW	LOW	-374.493	260.53	-113.963
TCGA.C8.A12V.01A.11R.A115.07	HIGH	HIGH	HIGH	816.975	2938.87	3755.84
TCGA.A8.A082.01A.11R.A00Z.07	LOW	LOW	LOW	292.646	318.422	611.068
TCGA.E2.A1L6.01A.11R.A13Q.07	LOW	LOW	LOW	483.943	375.415	859.358
TCGA.B6.A2IU.01A.32R.A18M.07	LOW	LOW	LOW	-240.339	-344.182	-584.521
TCGA.AO.A1KR.01A.12R.A144.07	LOW	LOW	LOW	-913.335	449.738	-463.597
TCGA.E2.A159.01A.11R.A115.07	HIGH	HIGH	HIGH	543.664	1822.68	2366.35
TCGA.BH.A0HK.01A.11R.A056.07	HIGH	LOW	HIGH	743.772	518.467	1262.24
TCGA.AC.A3BB.01A.21R.A19W.07	HIGH	HIGH	HIGH	1235.88	1801.96	3037.85
TCGA.E9.A244.01A.11R.A169.07	LOW	LOW	LOW	15.731	-7.42293	8.30809
TCGA.AN.A0FL.01A.11R.A034.07	LOW	LOW	LOW	-578.145	-270.14	-848.286
TCGA.BH.A0H9.01A.11R.A056.07	LOW	LOW	LOW	-34.3204	-94.2627	-128.583
TCGA.GM.A2DF.01A.11R.A180.07	HIGH	HIGH	HIGH	593.908	1690.34	2284.25
TCGA.E2.A1B5.01A.21R.A12P.07	HIGH	HIGH	HIGH	860.151	2626.83	3486.98
TCGA.E2.A2P6.01A.11R.A19W.07	LOW	LOW	LOW	79.9528	399.703	479.655
TCGA.D8.A1JI.01A.11R.A13Q.07	LOW	LOW	LOW	-358.718	-5.31405	-364.032
TCGA.S3.AA17.01A.11R.A41B.07	HIGH	HIGH	HIGH	572.694	2363.37	2936.06
TCGA.AN.A0AS.01A.11R.A00Z.07	HIGH	HIGH	HIGH	937.782	665.522	1603.3
TCGA.A7.A3RF.01A.11R.A22K.07	LOW	LOW	LOW	-256.684	-489.698	-746.382
TCGA.AQ.A04L.01B.21R.A10J.07	LOW	LOW	LOW	471.09	108.82	579.91
TCGA.BH.A28Q.01A.11R.A16F.07	LOW	LOW	LOW	479.481	169.996	649.476
TCGA.BH.A1FH.01A.12R.A13Q.07	HIGH	LOW	HIGH	1627.61	413.87	2041.48
TCGA.A8.A09N.01A.11R.A00Z.07	LOW	LOW	LOW	305.721	200.437	506.158
TCGA.B6.A0RL.01A.11R.A084.07	LOW	LOW	LOW	-2054.58	-853.035	-2907.62
TCGA.BH.AB28.01A.31R.A41B.07	LOW	HIGH	HIGH	525.129	958.988	1484.12
TCGA.AN.A0XO.01A.11R.A109.07	LOW	LOW	LOW	265.833	-728.873	-463.04
TCGA.E2.A1LG.01A.21R.A14M.07	LOW	LOW	LOW	-1019.53	249.223	-770.303
TCGA.AO.A12C.01A.11R.A10J.07	HIGH	LOW	LOW	1110.68	-130.207	980.473
TCGA.EW.A1J5.01A.11R.A13Q.07	LOW	HIGH	HIGH	509.782	1589.93	2099.71
TCGA.AR.A1AU.01A.11R.A12P.07	HIGH	LOW	LOW	544.057	73.2954	617.353
TCGA.AC.A8OP.01A.11R.A36F.07	LOW	LOW	LOW	469.77	364.578	834.348
TCGA.A8.A09Z.01A.11R.A00Z.07	LOW	HIGH	LOW	-95.3259	1194.46	1099.14
TCGA.LL.A5YP.01A.21R.A28M.07	HIGH	HIGH	HIGH	1159.16	941.173	2100.33
TCGA.B6.A0RG.01A.11R.A056.07	LOW	LOW	LOW	72.742	-385.528	-312.786
TCGA.A2.A3XW.01A.11R.A239.07	HIGH	HIGH	HIGH	544.283	1299.98	1844.26
TCGA.LD.A9QF.01A.32R.A41B.07	HIGH	HIGH	HIGH	1433.16	2680.56	4113.72
TCGA.A2.A0YD.01A.11R.A109.07	HIGH	HIGH	HIGH	1462.91	1199.8	2662.71
TCGA.BH.A0HP.01A.12R.A084.07	HIGH	HIGH	HIGH	769.814	664.674	1434.49
TCGA.C8.A275.01A.21R.A16F.07	LOW	HIGH	HIGH	475.541	1804.05	2279.59
TCGA.A7.A26I.01B.06R.A22O.07	HIGH	HIGH	HIGH	1453.49	709.793	2163.28
TCGA.A2.A04V.01A.21R.A034.07	HIGH	LOW	HIGH	783.18	410.976	1194.16
TCGA.V7.A7HQ.01A.11R.A33J.07	LOW	LOW	LOW	238.767	400.1	638.868
TCGA.E9.A1R0.01A.22R.A16F.07	HIGH	LOW	HIGH	736.547	589.862	1326.41
TCGA.B6.A400.01A.11R.A239.07	LOW	HIGH	HIGH	417.709	956.33	1374.04
TCGA.BH.A0C7.01B.11R.A115.07	LOW	LOW	LOW	175.958	343.217	519.175
TCGA.A7.A13G.01B.04R.A22O.07	HIGH	LOW	LOW	593.643	93.2908	686.934
TCGA.C8.A138.01A.11R.A115.07	HIGH	HIGH	HIGH	1115.91	1707.13	2823.04
TCGA.AR.A0U2.01A.11R.A109.07	LOW	LOW	LOW	-300.529	419.287	118.759
TCGA.C8.A130.01A.31R.A115.07	LOW	LOW	LOW	514.547	246.249	760.797
TCGA.A8.A07F.01A.11R.A00Z.07	LOW	LOW	LOW	435.722	463.44	899.161
TCGA.GM.A3XL.01A.11R.A22U.07	LOW	HIGH	LOW	-590.215	1471.4	881.185
TCGA.S3.A6ZG.01A.22R.A32P.07	LOW	LOW	LOW	146.089	542.387	688.476
TCGA.AC.A2QH.01B.04R.A22O.07	LOW	LOW	LOW	21.6186	-914.251	-892.632
TCGA.AR.A24S.01A.11R.A169.07	HIGH	HIGH	HIGH	1479.64	1605.64	3085.28
TCGA.E2.A574.01A.11R.A29R.07	LOW	LOW	LOW	-1176.14	-750.071	-1926.21
TCGA.A2.A0T2.01A.11R.A084.07	LOW	LOW	LOW	141.322	505.227	646.549
TCGA.E9.A1RG.01A.11R.A14D.07	LOW	HIGH	LOW	299.643	693.86	993.503
TCGA.A2.A0EU.01A.22R.A056.07	LOW	LOW	LOW	199.45	-62.3644	137.085
TCGA.D8.A1J9.01A.11R.A13Q.07	HIGH	LOW	HIGH	824.054	507.463	1331.52
TCGA.C8.A8HP.01A.11R.A36F.07	LOW	HIGH	HIGH	448.818	1752.89	2201.71
TCGA.BH.A1EX.01A.11R.A13Q.07	HIGH	HIGH	HIGH	1079.24	889.35	1968.59
TCGA.B6.A1KF.01A.11R.A13Q.07	LOW	LOW	LOW	-183.581	-853.487	-1037.07
TCGA.AR.A24T.01A.11R.A169.07	HIGH	HIGH	HIGH	1496.96	691.8	2188.76
TCGA.A2.A0YH.01A.11R.A109.07	HIGH	HIGH	HIGH	1125.87	1677.75	2803.62
TCGA.C8.A133.01A.32R.A12D.07	LOW	LOW	LOW	-1167.25	-180.043	-1347.29
TCGA.D8.A1XM.01A.21R.A14M.07	HIGH	HIGH	HIGH	1180.61	1246.26	2426.86
TCGA.AN.A0XL.01A.11R.A10J.07	HIGH	LOW	HIGH	1107.94	93.6598	1201.6
TCGA.C8.A12T.01A.11R.A115.07	HIGH	LOW	HIGH	909.831	412.082	1321.91
TCGA.E2.A15O.01A.11R.A115.07	LOW	LOW	LOW	-492.656	-55.6117	-548.268
TCGA.AO.A03V.01A.11R.A115.07	LOW	LOW	LOW	-5.89662	-44.4265	-50.3231
TCGA.A7.A6VY.01A.12R.A33J.07	HIGH	HIGH	HIGH	573.998	1454.34	2028.34
TCGA.BH.A1EW.01A.11R.A137.07	LOW	HIGH	HIGH	450.79	957.107	1407.9
TCGA.AC.A2BK.01A.11R.A21T.07	LOW	LOW	LOW	-1310.06	-687.07	-1997.13
TCGA.E2.A1LH.01A.11R.A14D.07	HIGH	HIGH	HIGH	609.509	2214.65	2824.16
TCGA.A2.A1FW.01A.11R.A13Q.07	LOW	LOW	LOW	285.88	-124.224	161.656
TCGA.A8.A09K.01A.11R.A00Z.07	LOW	HIGH	LOW	-626.874	751.925	125.051
TCGA.XX.A899.01A.11R.A36F.07	HIGH	HIGH	HIGH	1233.29	1902.42	3135.71
TCGA.A2.A0SY.01A.31R.A084.07	HIGH	HIGH	HIGH	1196.32	1239.04	2435.36
TCGA.A2.A0CS.01A.11R.A115.07	HIGH	LOW	LOW	646.063	479.087	1125.15
TCGA.BH.A1F6.01A.11R.A13Q.07	LOW	HIGH	HIGH	427.858	1270.78	1698.64
TCGA.A8.A07W.01A.11R.A00Z.07	LOW	LOW	LOW	398.422	536.33	934.752
TCGA.D8.A1XU.01A.11R.A14M.07	HIGH	LOW	HIGH	933.955	498.146	1432.1
TCGA.B6.A0IJ.01A.11R.A034.07	LOW	HIGH	HIGH	-155.857	1952.87	1797.01
TCGA.LL.A5YL.01A.12R.A29R.07	LOW	HIGH	HIGH	477.692	1171.03	1648.72
TCGA.A2.A0CM.01A.31R.A034.07	HIGH	HIGH	HIGH	687.006	1711.47	2398.48
TCGA.AR.A2LN.01A.21R.A18M.07	HIGH	HIGH	HIGH	1404.79	887.858	2292.65
TCGA.E2.A14O.01A.31R.A115.07	LOW	LOW	LOW	-125.749	146.171	20.422
TCGA.B6.A0WV.01A.11R.A109.07	LOW	LOW	LOW	-699.381	-981.214	-1680.6
TCGA.A1.A0SF.01A.11R.A144.07	HIGH	HIGH	HIGH	536.21	908.205	1444.41
TCGA.BH.A0RX.01A.21R.A084.07	HIGH	HIGH	HIGH	1240.88	2213.25	3454.13
TCGA.OL.A5D7.01A.11R.A27Q.07	LOW	HIGH	HIGH	-419.794	1762.52	1342.73
TCGA.B6.A0IA.01A.11R.A034.07	LOW	LOW	LOW	-832.071	-324.672	-1156.74
TCGA.PL.A8LY.01A.11R.A41B.07	LOW	LOW	LOW	-582.489	262.213	-320.275
TCGA.E9.A1R4.01A.21R.A14D.07	HIGH	HIGH	HIGH	607.009	1683.97	2290.98
TCGA.BH.A0HY.01A.11R.A056.07	LOW	LOW	LOW	313.811	-336.349	-22.5379
TCGA.A2.A0CY.01A.12R.A034.07	LOW	LOW	LOW	-1017.6	-522.487	-1540.08
TCGA.A7.A5ZX.01A.12R.A29R.07	HIGH	LOW	LOW	747.708	-44.1004	703.608
TCGA.A2.A4S3.01A.21R.A266.07	LOW	HIGH	LOW	22.3957	975.985	998.381
TCGA.B6.A0WY.01A.11R.A109.07	HIGH	LOW	LOW	685.003	494.907	1179.91
TCGA.C8.A12Y.01A.11R.A12D.07	LOW	LOW	LOW	382.696	324.356	707.052
TCGA.AN.A0XP.01A.11R.A109.07	LOW	LOW	LOW	485.998	24.3409	510.339
TCGA.BH.A0HB.01A.11R.A056.07	LOW	HIGH	HIGH	485.57	1239.21	1724.78
TCGA.E9.A1NH.01A.11R.A14D.07	HIGH	HIGH	HIGH	1215.85	642.762	1858.61
TCGA.E2.A1LA.01A.11R.A144.07	HIGH	HIGH	HIGH	673.049	1773.57	2446.62
TCGA.AO.A0J9.01A.11R.A034.07	HIGH	HIGH	HIGH	1406.26	1774.72	3180.98
TCGA.A2.A0YG.01A.21R.A109.07	LOW	LOW	LOW	-179.785	46.3866	-133.398
TCGA.LL.A441.01A.11R.A24H.07	LOW	HIGH	HIGH	404.883	2250.52	2655.41
TCGA.D8.A73X.01A.11R.A32P.07	HIGH	LOW	LOW	633.749	251.935	885.684
TCGA.BH.A0HN.01A.11R.A10U.07	LOW	LOW	LOW	-713.522	3.93433	-709.587
TCGA.EW.A1PG.01A.11R.A144.07	HIGH	LOW	LOW	832.663	123.205	955.869
TCGA.EW.A1OX.01A.11R.A144.07	LOW	LOW	LOW	-1300.34	-1200.91	-2501.25
TCGA.D8.A1XK.01A.21R.A14M.07	LOW	HIGH	LOW	-424.861	923.943	499.082
TCGA.AR.A24L.01A.11R.A169.07	HIGH	LOW	LOW	988.207	65.1465	1053.35
TCGA.A8.A07Z.01A.11R.A00Z.07	LOW	LOW	LOW	-274.79	597.933	323.143
TCGA.BH.A0W3.01A.11R.A109.07	LOW	LOW	LOW	-409.087	60.7816	-348.305
TCGA.D8.A1XR.01A.11R.A14M.07	LOW	LOW	LOW	137.438	-120.288	17.1504
TCGA.A2.A1FZ.01A.51R.A14D.07	HIGH	HIGH	HIGH	1118.37	811.531	1929.9
TCGA.A2.A04Y.01A.21R.A034.07	LOW	HIGH	HIGH	419.021	1316.29	1735.31
TCGA.D8.A147.01A.11R.A115.07	LOW	HIGH	LOW	-65.6556	906.044	840.389
TCGA.D8.A1JJ.01A.31R.A14M.07	HIGH	LOW	HIGH	888.878	475.455	1364.33
TCGA.EW.A1IX.01A.12R.A144.07	HIGH	LOW	HIGH	1152.05	498.859	1650.91
TCGA.E2.A1IE.01A.11R.A13Q.07	LOW	LOW	LOW	-351.339	-754.862	-1106.2
TCGA.Z7.A8R5.01A.42R.A41B.07	HIGH	HIGH	HIGH	630.673	1584.12	2214.79
TCGA.EW.A1P7.01A.21R.A144.07	HIGH	HIGH	HIGH	1173.78	2623.6	3797.38
TCGA.AR.A1AT.01A.11R.A12P.07	HIGH	HIGH	HIGH	551.944	1728.49	2280.44
TCGA.A7.A13E.01A.11R.A12P.07	LOW	LOW	LOW	-196.707	-427.475	-624.181
TCGA.AO.A126.01A.11R.A10J.07	HIGH	LOW	HIGH	1090.69	594.857	1685.55
TCGA.E2.A15M.01A.11R.A12D.07	HIGH	HIGH	HIGH	1655.31	2029.65	3684.96
TCGA.A7.A13E.01A.11R.A277.07	LOW	LOW	LOW	-23.5571	-527.343	-550.9
TCGA.A8.A08F.01A.11R.A00Z.07	HIGH	HIGH	HIGH	842.578	1462.96	2305.54
TCGA.EW.A1IW.01A.11R.A13Q.07	HIGH	LOW	HIGH	660.349	559.13	1219.48
TCGA.C8.A1HF.01A.11R.A137.07	HIGH	HIGH	HIGH	944.743	1539.62	2484.36
TCGA.AO.A0JI.01A.21R.A056.07	LOW	LOW	LOW	-496.562	-145.281	-641.843
TCGA.D8.A3Z6.01A.11R.A239.07	LOW	LOW	LOW	506.798	12.1746	518.973
TCGA.AO.A0JA.01A.11R.A056.07	HIGH	HIGH	HIGH	1220.36	775.554	1995.92
TCGA.OL.A66O.01A.11R.A31O.07	LOW	LOW	LOW	-186.239	-328.557	-514.795
TCGA.A2.A0T5.01A.21R.A084.07	LOW	LOW	LOW	359.212	89.0371	448.249
TCGA.A2.A0EM.01A.11R.A034.07	HIGH	LOW	LOW	731.024	105.22	836.244
TCGA.BH.A0BJ.01A.11R.A056.07	HIGH	HIGH	HIGH	916.599	700.691	1617.29
TCGA.A7.A0DC.01B.04R.A22O.07	LOW	LOW	LOW	86.0176	-457.122	-371.105
TCGA.D8.A146.01A.31R.A115.07	HIGH	HIGH	HIGH	1116.9	620.248	1737.15
TCGA.B6.A0X7.01A.11R.A10J.07	HIGH	LOW	LOW	689.25	-147.976	541.273
TCGA.E9.A54X.01A.11R.A266.07	LOW	LOW	LOW	-1767.74	-1097.44	-2865.18
TCGA.BH.A0AZ.01A.21R.A12P.07	HIGH	HIGH	HIGH	1655.81	695.352	2351.16
TCGA.GI.A2C8.01A.11R.A16F.07	HIGH	HIGH	HIGH	1494.91	1170.94	2665.85
TCGA.BH.A1FJ.01A.11R.A13Q.07	LOW	LOW	LOW	-332.538	-593.483	-926.021
TCGA.A1.A0SB.01A.11R.A144.07	LOW	LOW	LOW	-349.418	-1069.06	-1418.48
TCGA.BH.A0B6.01A.11R.A19W.07	HIGH	HIGH	HIGH	1036.13	2569.72	3605.84
TCGA.AC.A62X.01A.11R.A29R.07	LOW	LOW	LOW	-847.133	-294.501	-1141.63
TCGA.A8.A09Q.01A.11R.A00Z.07	HIGH	HIGH	HIGH	909.355	1459.86	2369.22
TCGA.BH.A18R.01A.11R.A12D.07	LOW	LOW	LOW	-204.176	368.851	164.676
